# Supplementary material for: Microbial role in CO 2 fluxes along the river-estuary continuum in a rapidly uplifting catchment of eastern Taiwan
Source: Copernicus journal article supplement (doi:10.5194/egusphere-2025-5904), 2025-12-04
Supplement: Supplementary file 1 [file supplementary_material.pdf › supplementary_material.pdf]

Table S1. Detailed physicochemical characteristics for seven field campaigns.

| Tributary & Altitude | Time                   | T <sup>2</sup> (°C) | pH   | TSM <sup>2</sup> (mg/L) | POC (mg m <sup>-3</sup> ) | $\delta^{13}\text{C}$ -POC (‰) | DIC (mM) | $\delta^{13}\text{C}$ -DIC (‰) | DOC (μM) | Chl a (mg m <sup>-3</sup> ) | TIN <sup>3</sup> (μM) | NH <sub>4</sub> <sup>+</sup> (μM) | PO <sub>4</sub> <sup>2-</sup> (μM) | SO <sub>4</sub> <sup>2-</sup> (mM) | Cl <sup>-</sup> (mM) | Na <sup>+</sup> (mM) | Mg <sup>2+</sup> | K <sup>+</sup> | Ca <sup>2+</sup> |
|----------------------|------------------------|---------------------|------|-------------------------|---------------------------|--------------------------------|----------|--------------------------------|----------|-----------------------------|-----------------------|-----------------------------------|------------------------------------|------------------------------------|----------------------|----------------------|------------------|----------------|------------------|
| MLL01<br>699 m       | 2020. Mar <sup>1</sup> | 18.0                | 8.39 | 29.29                   | 134                       | -27.6                          | 2.25     | -3.7                           | 22.10    | NA                          | 3.8                   | 0.9                               | 0.09                               | 2.98                               | 0.01                 | 0.17                 | 0.67             | 0.04           | 3.37             |
|                      | 2020. May <sup>1</sup> | 21.6                | 8.36 | 8.79                    | 189                       | -27.5                          | 1.58     | -1.2                           | 18.75    | 0.499                       | 2.7                   | 0.3                               | 0.02                               | 3.17                               | 0.01                 | 0.17                 | 0.66             | 0.04           | 3.36             |
|                      | 2020. Jul              | 25.9                | 8.82 | 76.95                   | 1111                      | -24.5                          | 1.94     | 0.6                            | 48.53    | 0.097                       | 8.6                   | 2.2                               | 0.03                               | 3.59                               | 0.01                 | 0.17                 | 0.63             | 0.05           | 3.44             |
|                      | 2020. Aug-1            | 23.5                | 8.33 | 236.16                  | 3753                      | -24.1                          | 1.87     | -1.2                           | 25.65    | 0.002                       | 13.5                  | 2.1                               | 0.11                               | NA                                 | NA                   | 0.15                 | 0.65             | 0.06           | 3.46             |
|                      | 2020. Aug-2            | 24.6                | 8.35 | NA                      | NA                        | NA                             | NA       | -4.5                           | 18.10    | NA                          | 7.8                   | NA                                | 0.01                               | 3.26                               | 0.01                 | 0.15                 | 0.60             | 0.05           | 3.09             |
|                      | 2020. Oct              | 19.5                | 7.95 | NA                      | NA                        | NA                             | 1.96     | -1.9                           | 29.30    | 0.103                       | 10.1                  | 9.6                               | 0.02                               | 3.21                               | 0.01                 | 0.14                 | 0.62             | 0.04           | 3.19             |
| CWL01<br>375 m       | 2021. Jan <sup>1</sup> | 12.3                | 7.44 | 6.98                    | 133                       | -27.1                          | 1.91     | -3.3                           | 21.03    | 0.390                       | 13.9                  | 0.5                               | 0.04                               | 2.92                               | 0.01                 | 0.17                 | 0.65             | 0.04           | 3.51             |
|                      | 2020. Mar <sup>1</sup> | 19.5                | 8.3  | 32.92                   | 252                       | -26.1                          | 2.59     | -3.4                           | 20.28    | NA                          | 4.7                   | 2.5                               | 0.06                               | 1.65                               | 0.06                 | 0.77                 | 0.46             | 0.04           | 2.16             |
|                      | 2020. May <sup>1</sup> | 27.3                | 8.3  | 0.92                    | 355                       | -26.3                          | 1.88     | 0.1                            | 26.67    | 2.052                       | 1.7                   | 2.0                               | 0.05                               | 1.57                               | 0.05                 | 0.75                 | 0.43             | 0.04           | 2.05             |
|                      | 2020. Jul              | NA                  | NA   | NA                      | 2454                      | -21.5                          | 2.02     | -4.3                           | 55.11    | 0.841                       | 5.0                   | 3.3                               | 0.03                               | 1.57                               | 0.04                 | 0.47                 | 0.32             | 0.03           | 1.81             |
|                      | 2020. Aug-1            | 27.4                | 7.88 | 50.05                   | 500                       | -25.3                          | 1.26     | -2.0                           | 22.79    | 0.146                       | 6.5                   | 4.3                               | 0.06                               | NA                                 | NA                   | 0.51                 | 0.36             | 0.05           | 2.05             |
|                      | 2020. Aug-2            | 27.5                | 7.88 | 4.17                    | 213                       | -27.2                          | NA       | -3.2                           | 21.23    | 0.374                       | 5.8                   | NA                                | 0.12                               | 1.51                               | 0.04                 | 0.49                 | 0.33             | 0.04           | 1.89             |
| DL<br>382 m          | 2020. Oct              | 23.3                | 7.78 | NA                      | NA                        | NA                             | 2.14     | -1.5                           | 25.78    | 0.958                       | 6.8                   | 7.0                               | 0.04                               | 1.52                               | 0.04                 | 0.52                 | 0.38             | 0.04           | 2.03             |
|                      | 2021. Jan <sup>1</sup> | 13.8                | 8.85 | 3.18                    | 99                        | -28.0                          | 2.06     | -2.9                           | 24.93    | 0.616                       | 9.3                   | 3.1                               | 0.01                               | 1.61                               | 0.04                 | 0.46                 | 0.34             | 0.03           | 2.09             |
|                      | 2020. Mar <sup>1</sup> | 21.2                | 8.29 | 31.35                   | 194                       | -26.3                          | 2.80     | -2.1                           | 17.71    | NA                          | 19.5                  | 1.1                               | 0.12                               | 1.10                               | 0.66                 | 2.04                 | 0.23             | 0.15           | 1.69             |
|                      | 2020. May <sup>1</sup> | 29.5                | 8.41 | 1.95                    | 198                       | -26.1                          | 1.99     | -1.3                           | 24.13    | 0.809                       | 14.5                  | 0.3                               | 0.12                               | 1.26                               | 0.71                 | 1.93                 | 0.22             | 0.14           | 1.44             |
|                      | 2020. Jul              | 25.5                | 8.4  | 2.17                    | 273                       | -26.0                          | 2.13     | -2.6                           | 65.30    | 1.743                       | 12.1                  | 3.0                               | 0.16                               | 1.12                               | 0.46                 | 1.23                 | 0.18             | 0.10           | 1.42             |
|                      | 2020. Aug-1            | 27.6                | 8.05 | 6.70                    | 308                       | -25.8                          | 2.13     | -1.3                           | 26.60    | 0.700                       | 21.7                  | 3.6                               | 0.11                               | NA                                 | NA                   | 1.05                 | 0.20             | 0.09           | 1.51             |
| LY04<br>238 m        | 2020. Aug-2            | 29.1                | 8.2  | NA                      | NA                        | NA                             | NA       | -2.8                           | 25.35    | NA                          | 14.0                  | 2.8                               | 0.15                               | 1.09                               | 0.46                 | 1.19                 | 0.19             | 0.09           | 1.41             |
|                      | 2020. Oct              | 24.1                | 7.1  | NA                      | NA                        | NA                             | 2.21     | -1.1                           | 24.32    | 0.967                       | 16.1                  | 16.1                              | 0.12                               | 1.04                               | 0.52                 | 1.33                 | 0.20             | 0.10           | 1.40             |
|                      | 2021. Jan <sup>1</sup> | 14.9                | 8.63 | 1.26                    | 86                        | -26.9                          | 2.50     | -2.4                           | 18.95    | 0.475                       | 20.0                  | 2.9                               | 0.23                               | 1.03                               | 0.45                 | 1.18                 | 0.20             | 0.09           | 1.53             |
|                      | 2020. Mar <sup>1</sup> | 23.4                | 8.18 | 32.18                   | 186                       | -28.0                          | 1.97     | -3.0                           | 18.92    | NA                          | 5.9                   | 1.6                               | 0.07                               | 1.35                               | 0.06                 | 0.67                 | 0.82             | 0.08           | 2.14             |
|                      | 2020. May <sup>1</sup> | 25.6                | 8.26 | 3.33                    | 214                       | -27.4                          | 2.24     | -5.0                           | 20.39    | 0.305                       | 7.4                   | 1.9                               | 0.07                               | 1.46                               | 0.06                 | 0.68                 | 0.84             | 0.08           | 1.80             |
|                      | 2020. Jul              | 28.2                | 8.19 | 377.09                  | 6280                      | -20.2                          | 2.50     | -4.0                           | 17.66    | 0.001                       | 3.1                   | 4.8                               | 0.07                               | 1.96                               | 0.05                 | 0.48                 | 0.94             | 0.08           | 1.74             |
| BNE<br>7 m           | 2020. Aug-1            | 29.6                | 7.97 | 619.95                  | 12443                     | -20.6                          | 1.86     | -1.2                           | 23.93    | 0.003                       | 13.1                  | 5.9                               | 0.08                               | NA                                 | NA                   | 0.48                 | 0.90             | 0.09           | 1.83             |
|                      | 2020. Aug-2            | 27.6                | 8.16 | NA                      | NA                        | NA                             | NA       | -4.0                           | 27.37    | NA                          | 11.6                  | NA                                | 0.12                               | 1.62                               | 0.05                 | 0.47                 | 0.83             | 0.08           | 1.71             |
|                      | 2020. Oct              | 24.1                | 7.87 | NA                      | NA                        | NA                             | 2.54     | -2.4                           | 22.93    | 0.150                       | 10.6                  | 10.8                              | 0.05                               | 1.51                               | 0.05                 | 0.47                 | 0.80             | 0.06           | 1.73             |
|                      | 2021. Jan <sup>1</sup> | 14.3                | 8.81 | 8.32                    | 121                       | -27.2                          | 2.81     | -3.6                           | 12.95    | 0.432                       | 11.4                  | 3.1                               | 0.06                               | 1.44                               | 0.05                 | 0.50                 | 0.80             | 0.06           | 1.85             |
|                      | 2020. Mar <sup>1</sup> | 25.3                | 8.22 | 31.05                   | 277                       | -26.1                          | 2.35     | -5.4                           | 42.58    | NA                          | 40.9                  | 1.9                               | 0.31                               | 1.39                               | 0.28                 | 0.74                 | 0.66             | 0.08           | 2.19             |
|                      | 2020. May <sup>1</sup> | 25.6                | 8.47 | 1.90                    | 296                       | -27.0                          | 1.87     | -5.8                           | 40.18    | 1.427                       | 29.5                  | 1.5                               | 0.26                               | 1.42                               | 0.27                 | 0.73                 | 0.67             | 0.07           | 2.09             |
| BNE<br>7 m           | 2020. Jul              | 28.8                | 7.64 | 13.07                   | 360                       | -26.0                          | 2.79     | -6.3                           | 76.94    | 0.293                       | 14.0                  | 3.4                               | 0.08                               | 2.06                               | 0.28                 | 0.74                 | 0.74             | 0.09           | 2.20             |
|                      | 2020. Aug-1            | 30.4                | 7.94 | 198.18                  | 4204                      | -24.0                          | 2.06     | -1.3                           | 44.39    | 0.095                       | 48.3                  | 4.1                               | 0.29                               | NA                                 | NA                   | 0.77                 | 0.66             | 0.09           | 2.03             |
|                      | 2020. Aug-2            | 28.6                | 7.75 | NA                      | NA                        | NA                             | NA       | -6.8                           | 26.43    | NA                          | 33.2                  | 5.3                               | 0.18                               | 1.77                               | 0.24                 | 0.73                 | 0.69             | 0.09           | 2.11             |
|                      | 2020. Oct              | 24.3                | 7.92 | NA                      | NA                        | NA                             | 2.88     | -5.1                           | 32.75    | 1.965                       | 28.5                  | 16.5                              | 0.19                               | 1.67                               | 0.24                 | 0.72                 | 0.69             | 0.08           | 2.10             |
|                      | 2021. Jan <sup>1</sup> | 13.7                | 8.49 | 2.80                    | 161                       | -26.0                          | 1.86     | -5.7                           | 24.09    | 2.039                       | 19.9                  | 1.7                               | 0.17                               | 1.57                               | 0.22                 | 0.72                 | 0.65             | 0.07           | 2.20             |

<sup>\*</sup> Parameters shown in bold are significantly different between two seasons (Wilcoxon test,  $p < 0.05$ ).

<sup>1</sup> Dry seasons.

<sup>2</sup> T: water temperature; TSM: total suspended matter.

<sup>3</sup> TIN includes nitrate and nitrite (nitrite was below detection limit).

Table S2. Metabolic rates of autotrophy and heterotrophy measured in this study.

| Site  | Time     | Autotrophy      |                                                     | Substrate | Heterotrophy                                        |                                                        | Ratio    |
|-------|----------|-----------------|-----------------------------------------------------|-----------|-----------------------------------------------------|--------------------------------------------------------|----------|
|       |          | Light condition | Uptake Rate (mg-C m <sup>-3</sup> h <sup>-1</sup> ) |           | Uptake Rate (mg-C m <sup>-3</sup> h <sup>-1</sup> ) | Catabolic rate (mg-C m <sup>-3</sup> h <sup>-1</sup> ) |          |
| MLL01 | Mar 2020 | Light           | 0.12 ± 0.03                                         |           |                                                     |                                                        |          |
|       |          | Dark            | bdl                                                 |           |                                                     |                                                        |          |
|       | May 2020 | Light           | 0.076 ± 0.01                                        |           |                                                     |                                                        |          |
|       |          | Dark            | 0.001                                               |           |                                                     |                                                        |          |
|       | Aug 2020 | Light           | 0.60 ± 0.02                                         | Gly       | 0.061 ± 0.01                                        | 6.50 ± 0.62                                            | 105.54   |
|       |          | Dark            | 0.69                                                | Leu       | 0.004 ± 0.00                                        | 5.58 ± 1.66                                            | 1295.70  |
|       | Jan 2021 | Light           | 0.03 ± 0.017                                        | Gly       | bdl                                                 | 27.17 ± 9.10                                           | inf      |
|       |          | Dark            | bdl                                                 | Leu       | bdl                                                 | 22.75 ± 0.75                                           | inf      |
| CWL01 | Mar 2020 | Light           | 0.47 ± 0.04                                         |           |                                                     |                                                        |          |
|       |          | Dark            | 0.05                                                |           |                                                     |                                                        |          |
|       | May 2020 | Light           | 0.18 ± 0.02                                         |           |                                                     |                                                        |          |
|       |          | Dark            | 0.01                                                |           |                                                     |                                                        |          |
|       | Aug 2020 | Light           | 0.38 ± 0.08                                         | Gly       | 0.02 ± 0.001                                        | 154.48 ± 25.38                                         | 7701.82  |
|       |          | Dark            | 0.02                                                | Leu       | 0.005 ± 0.0006                                      | 62.00 ± 20.33                                          | 12431.40 |
|       | Jan 2021 | Light           | 0.05 ± 0.01                                         | Gly       | 0.001 ± 0.0006                                      | 25.79 ± 3.27                                           | 24883.41 |
|       |          | Dark            | bdl                                                 | Leu       | 0.01 ± 0.004                                        | 20.49 ± 5.44                                           | 1688.73  |
| DL    | Mar 2020 | Light           | 0.46 ± 0.09                                         |           |                                                     |                                                        |          |
|       |          | Dark            | bdl                                                 |           |                                                     |                                                        |          |
|       | May 2020 | Light           | 0.29 ± 0.02                                         |           |                                                     |                                                        |          |
|       |          | Dark            | 0.02                                                |           |                                                     |                                                        |          |
|       | Aug 2020 | Light           | 0.25 ± 0.01                                         | Gly       | 0.048 ± 0.003                                       | 63.86 ± 30.78                                          | 1328.83  |
|       |          | Dark            | bdl                                                 | Leu       | 0.009 ± 0.003                                       | 11.98 ± 1.01                                           | 1350.84  |
|       | Jan 2021 | Light           | bdl                                                 | Gly       | bdl                                                 | 4.57 ± 4.36                                            | inf      |
|       |          | Dark            | bdl                                                 | Leu       | bdl                                                 | 11.13 ± 10.44                                          | inf      |
| LY04  | Mar 2020 | Light           | 0.11 ± 0.01                                         |           |                                                     |                                                        |          |
|       |          | Dark            | bdl                                                 |           |                                                     |                                                        |          |
|       | May 2020 | Light           | 0.13 ± 0.02                                         |           |                                                     |                                                        |          |
|       |          | Dark            | 0.01                                                |           |                                                     |                                                        |          |
|       | Aug 2020 | Light           | 1.10 ± 0.05                                         | Gly       | 0.08 ± 0.03                                         | 63.61 ± 43.70                                          | 737.09   |
|       |          | Dark            | 1.60                                                | Leu       | 0.12 ± 0.10                                         | 16.43 ± 3.79                                           | 134.06   |
|       | Jan 2021 | Light           | 0.09 ± 0.01                                         | Gly       | 0.001 ± 0.001                                       | 7.39 ± 2.77                                            | 5136.36  |
|       |          | Dark            | 0.00                                                | Leu       | 0.001 ± 0.001                                       | 12.84 ± 3.77                                           | 9137.88  |
| BNE   | Mar 2020 | Light           | 1.04 ± 0.03                                         |           |                                                     |                                                        |          |
|       |          | Dark            | 0.03                                                |           |                                                     |                                                        |          |
|       | May 2020 | Light           | 0.89 ± 0.19                                         |           |                                                     |                                                        |          |
|       |          | Dark            | bdl                                                 |           |                                                     |                                                        |          |
|       | Aug 2020 | Light           | 1.98 ± 0.28                                         | Gly       | 0.49 ± 0.079                                        | 67.31 ± 18.12                                          | 137.06   |
|       |          | Dark            | 0.19                                                | Leu       | 0.07 ± 0.01                                         | 57.97 ± 27.61                                          | 777.27   |
|       | Jan 2021 | Light           | 0.58 ± 0.03                                         | Gly       | 0.01 ± 0.002                                        | 62.97 ± 25.66                                          | 4506.05  |
|       |          | Dark            | 0.003                                               | Leu       | 0.004 ± 0.002                                       | 37.62 ± 10.13                                          | 9362.04  |

Table S3. Read numbers and alpha diversities for environmental samples.

| Sample         | Reads | Observed<br>ASVs | Chao1   | SE of<br>Chao1 <sup>1</sup> | Shannon<br>index |
|----------------|-------|------------------|---------|-----------------------------|------------------|
| BNE_Mar_2020   | 12236 | 209              | 226.27  | 10.23                       | 4.43             |
| BNE_May_2020   | 13956 | 291              | 340.04  | 18.18                       | 4.43             |
| BNE_Jul_2020   | 29426 | 708              | 801.15  | 19.24                       | 5.25             |
| BNE_Aug_2020   | 14994 | 338              | 345.50  | 4.27                        | 4.88             |
| BNE_Jan_2021   | 47690 | 1072             | 1370.43 | 41.73                       | 5.99             |
| CWL01_Mar_2020 | 49887 | 1441             | 2037.99 | 62.61                       | 6.10             |
| CWL01_May_2020 | 37811 | 1299             | 1583.22 | 37.02                       | 6.63             |
| CWL01_Aug_2020 | 40062 | 1690             | 2309.96 | 61.81                       | 6.96             |
| CWL01_Jan_2021 | 18358 | 668              | 716.01  | 12.89                       | 5.93             |
| DL_Mar_2020    | 17139 | 716              | 783.08  | 15.57                       | 5.77             |
| DL_May_2020    | 22752 | 816              | 936.63  | 22.81                       | 5.94             |
| DL_Jul_2020    | 19271 | 719              | 774.03  | 14.03                       | 5.99             |
| DL_Aug_2020    | 18152 | 796              | 860.01  | 14.90                       | 6.02             |
| DL_Jan_2021    | 30383 | 747              | 859.99  | 22.13                       | 5.15             |
| LY04_Mar_2020  | 19578 | 948              | 1057.56 | 21.26                       | 6.43             |
| LY04_May_2020  | 28621 | 1265             | 1519.01 | 34.13                       | 6.55             |
| LY04_Jul_2020  | 5220  | 306              | 306.00  | 0.00                        | 4.87             |
| LY04_Aug_2020  | 7169  | 419              | 421.63  | 2.18                        | 5.54             |
| LY04_Jan_2021  | 40904 | 880              | 990.19  | 20.61                       | 5.91             |
| MLL01_Mar_2020 | 10512 | 715              | 742.60  | 8.65                        | 6.20             |
| MLL01_May_2020 | 14418 | 922              | 983.94  | 13.68                       | 6.38             |
| MLL01_Jul_2020 | 9353  | 369              | 380.94  | 6.03                        | 5.23             |
| MLL01_Aug_2020 | 13001 | 728              | 777.63  | 12.61                       | 5.87             |
| MLL01_Jan_2021 | 11894 | 476              | 483.93  | 4.41                        | 5.70             |

\* Reads of CWL01\_Jul\_2020 was excluded from the analysis due to limited number.

<sup>1</sup> Standard error of Chao1 index.

Table S4. Pearson correlation for the physicochemical characteristics.

|                                 | T     | pH      | TSM    | POC    | $\delta^{13}\text{C}$ -POC | DOC   | $\text{NH}_4^+$ | Chl a | DIC    | $\delta^{13}\text{C}$ -DIC | TIN <sup>1</sup> | $\text{PO}_4^{2-}$ | $\text{SO}_4^{2-}$ | $\text{Cl}^-$ | $\text{Na}^+$ | $\text{Mg}^{2+}$ | $\text{K}^+$ | $\text{Ca}^{2+}$ |
|---------------------------------|-------|---------|--------|--------|----------------------------|-------|-----------------|-------|--------|----------------------------|------------------|--------------------|--------------------|---------------|---------------|------------------|--------------|------------------|
| T                               | 1     |         |        |        |                            |       |                 |       |        |                            |                  |                    |                    |               |               |                  |              |                  |
| pH                              | -0.29 | 1       |        |        |                            |       |                 |       |        |                            |                  |                    |                    |               |               |                  |              |                  |
| TSM                             | 0.37  | -0.19   | 1      |        |                            |       |                 |       |        |                            |                  |                    |                    |               |               |                  |              |                  |
| POC                             | 0.39  | -0.21   | 0.99** | 1      |                            |       |                 |       |        |                            |                  |                    |                    |               |               |                  |              |                  |
| $\delta^{13}\text{C}$ -POC      | 0.49* | -0.20   | 0.89** | 0.83** | 1                          |       |                 |       |        |                            |                  |                    |                    |               |               |                  |              |                  |
| DOC                             | 0.34* | -0.09   | -0.08  | -0.02  | 0.20                       | 1     |                 |       |        |                            |                  |                    |                    |               |               |                  |              |                  |
| $\text{NH}_4^+$                 | 0.13  | -0.56** | 0.66** | 0.67** | 0.67**                     | 0.00  | 1               |       |        |                            |                  |                    |                    |               |               |                  |              |                  |
| Chl a                           | -0.12 | 0.10    | -0.46  | -0.41  | -0.31                      | 0.16  | 0.11            | 1     |        |                            |                  |                    |                    |               |               |                  |              |                  |
| DIC                             | -0.12 | 0.00    | -0.09  | -0.11  | -0.06                      | 0.06  | 0.29            | 0.05  | 1      |                            |                  |                    |                    |               |               |                  |              |                  |
| $\delta^{13}\text{C}$ -DIC      | 0.09  | 0.06    | 0.22   | 0.21   | 0.15                       | -0.18 | 0.02            | -0.24 | -0.39* | 1                          |                  |                    |                    |               |               |                  |              |                  |
| $\text{NO}_3^- + \text{NO}_2^-$ | 0.18  | -0.15   | 0.03   | 0.05   | 0.02                       | 0.26  | 0.14            | 0.14  | 0.18   | -0.28                      | 1                |                    |                    |               |               |                  |              |                  |
| $\text{PO}_4^{2-}$              | 0.22  | -0.02   | -0.03  | -0.02  | -0.04                      | 0.23  | 0.01            | 0.31  | 0.17   | -0.31                      | 0.86**           | 1                  |                    |               |               |                  |              |                  |
| $\text{SO}_4^{2-}$              | -0.15 | 0.05    | 0.15   | 0.10   | 0.05                       | 0.01  | -0.12           | -0.42 | -0.36  | 0.14                       | -0.31            | -0.51**            | 1                  |               |               |                  |              |                  |
| $\text{Cl}^-$                   | 0.22  | -0.07   | -0.18  | -0.20  | -0.05                      | 0.15  | 0.04            | 0.33  | 0.24   | 0.04                       | 0.49**           | 0.57**             | -0.57**            | 1             |               |                  |              |                  |
| $\text{Na}^+$                   | 0.20  | -0.03   | -0.22  | -0.20  | -0.12                      | 0.04  | -0.01           | 0.39* | 0.32   | 0.08                       | 0.30             | 0.41*              | -0.71**            | 0.94**        | 1             |                  |              |                  |
| $\text{Mg}^{2+}$                | 0.03  | 0.00    | 0.48*  | 0.43*  | 0.22                       | -0.07 | 0.02            | -0.32 | 0.09   | -0.36*                     | 0.03             | -0.07              | 0.39*              | -0.60**       | -0.59**       | 1                |              |                  |
| $\text{K}^+$                    | 0.37* | -0.09   | 0.13   | 0.11   | 0.09                       | 0.08  | 0.03            | 0.09  | 0.33   | -0.03                      | 0.45**           | 0.49**             | -0.52**            | 0.88*         | 0.84**        | -0.18            | 1            |                  |
| $\text{Ca}^{2+}$                | -0.33 | 0.09    | -0.02  | -0.07  | -0.14                      | -0.04 | -0.22           | -0.27 | -0.33  | 0.08                       | -0.18            | -0.33*             | 0.94**             | -0.58**       | -0.71**       | 0.36*            | -0.55**      | 1                |

\* Results with significant difference are indicated by asterisks (\*:  $p < 0.05$ , \*\*:  $p < 0.01$ ).

<sup>1</sup> TIN includes nitrate and nitrite (nitrite is below detection limit).

Table S5. Estimates of catchment scaled CO<sub>2</sub> emission based on the extrapolation of site incubation data.

| Site &<br>AVE depth (m) | Time      | Flux derived from incubation                                         |         |         |                                                                                     |          | CO <sub>2</sub> consumption flux <sup>2</sup><br>(mol m <sup>-2</sup> yr <sup>-1</sup> ) | Estimated flux and yield                                                                |                                                         |       | Net emission <sup>4</sup><br>(mol yr <sup>-1</sup> ) | Total yield<br>(mol yr <sup>-1</sup> ) |          |
|-------------------------|-----------|----------------------------------------------------------------------|---------|---------|-------------------------------------------------------------------------------------|----------|------------------------------------------------------------------------------------------|-----------------------------------------------------------------------------------------|---------------------------------------------------------|-------|------------------------------------------------------|----------------------------------------|----------|
|                         |           | Uptake rate <sup>1</sup><br>(mol m <sup>-2</sup> day <sup>-1</sup> ) |         |         | CO <sub>2</sub> production <sup>1</sup><br>(mol m <sup>-2</sup> day <sup>-1</sup> ) |          |                                                                                          | CO <sub>2</sub> production flux <sup>2</sup><br>(mol m <sup>-2</sup> yr <sup>-1</sup> ) | River surface<br>area <sup>3</sup><br>(m <sup>2</sup> ) |       |                                                      |                                        |          |
|                         | Substrate | DIC                                                                  | Gly     | Leu     | Gly                                                                                 | Leu      |                                                                                          | DIC                                                                                     | Gly                                                     | Leu   |                                                      |                                        |          |
| MLL01<br>0.5 m          | Mar 2020  | 6.2E-05                                                              |         |         |                                                                                     |          |                                                                                          | 0.13                                                                                    | 6.14                                                    | 5.16  | 1.22E+05                                             | 6.15E+05                               | 7.89E+07 |
|                         | May 2020  | 3.9E-05                                                              |         |         |                                                                                     |          |                                                                                          |                                                                                         |                                                         |       |                                                      |                                        |          |
|                         | Aug 2020  | 6.5E-04                                                              | 6.2E-05 | 4.3E-06 | 6.50E-03                                                                            | 5.59E-03 |                                                                                          |                                                                                         |                                                         |       |                                                      |                                        |          |
|                         | Jan 2021  | 1.8E-05                                                              | bdl     | bdl     | 2.72E-02                                                                            | 2.28E-02 |                                                                                          |                                                                                         |                                                         |       |                                                      |                                        |          |
| CWL01<br>0.7 m          | Mar 2020  | 3.7E-04                                                              |         |         |                                                                                     |          |                                                                                          | 0.09                                                                                    | 46.15                                                   | 21.11 | 2.82E+06                                             | 5.92E+07                               |          |
|                         | May 2020  | 1.3E-04                                                              |         |         |                                                                                     |          |                                                                                          |                                                                                         |                                                         |       |                                                      |                                        |          |
|                         | Aug 2020  | 2.8E-04                                                              | 2.0E-05 | 5.0E-06 | 2.16E-01                                                                            | 8.68E-02 |                                                                                          |                                                                                         |                                                         |       |                                                      |                                        |          |
|                         | Jan 2021  | 4.0E-05                                                              | 1.0E-06 | 1.2E-05 | 3.61E-02                                                                            | 2.87E-02 |                                                                                          |                                                                                         |                                                         |       |                                                      |                                        |          |
| DL<br>0.5 m             | Mar 2020  | 2.3E-04                                                              |         |         |                                                                                     |          |                                                                                          | 0.05                                                                                    | 12.52                                                   | 4.22  | 1.41E+06                                             | 5.88E+06                               |          |
|                         | May 2020  | 1.6E-04                                                              |         |         |                                                                                     |          |                                                                                          |                                                                                         |                                                         |       |                                                      |                                        |          |
|                         | Aug 2020  | 1.3E-04                                                              | 4.8E-05 | 8.9E-06 | 6.39E-02                                                                            | 1.20E-02 |                                                                                          |                                                                                         |                                                         |       |                                                      |                                        |          |
|                         | Jan 2021  | 0.0E+00                                                              | bdl     | bdl     | 4.58E-03                                                                            | 1.11E-02 |                                                                                          |                                                                                         |                                                         |       |                                                      |                                        |          |
| LY04<br>0.5 m           | Mar 2020  | 6.0E-05                                                              |         |         |                                                                                     |          |                                                                                          | 0.26                                                                                    | 12.99                                                   | 5.35  | 2.36E+06                                             | 1.20E+07                               |          |
|                         | May 2020  | 7.2E-05                                                              |         |         |                                                                                     |          |                                                                                          |                                                                                         |                                                         |       |                                                      |                                        |          |
|                         | Aug 2020  | 1.4E-03                                                              | 8.6E-05 | 1.2E-04 | 6.36E-02                                                                            | 1.64E-02 |                                                                                          |                                                                                         |                                                         |       |                                                      |                                        |          |
|                         | Jan 2021  | 5.0E-05                                                              | 1.4E-06 | 1.4E-06 | 7.40E-03                                                                            | 1.28E-02 |                                                                                          |                                                                                         |                                                         |       |                                                      |                                        |          |
| BNE<br>0.7 m            | Mar 2020  | 7.5E-04                                                              |         |         |                                                                                     |          |                                                                                          | 0.39                                                                                    | 33.29                                                   | 24.44 | 5.17E+04                                             | 1.24E+06                               |          |
|                         | May 2020  | 6.3E-04                                                              |         |         |                                                                                     |          |                                                                                          |                                                                                         |                                                         |       |                                                      |                                        |          |
|                         | Aug 2020  | 1.5E-03                                                              | 4.9E-04 | 7.5E-05 | 9.42E-02                                                                            | 8.12E-02 |                                                                                          |                                                                                         |                                                         |       |                                                      |                                        |          |
|                         | Jan 2021  | 4.1E-04                                                              | 1.4E-05 | 4.0E-06 | 8.82E-02                                                                            | 5.27E-02 |                                                                                          |                                                                                         |                                                         |       |                                                      |                                        |          |

<sup>1</sup> CO<sub>2</sub> uptake rate per day = sum of DIC rate (light and dark) per hour (Table S2) x 12 hours x depth (m), or amino acid uptake rate per hour (Table S2) x 24 hours x depth. CO<sub>2</sub> production per day= amino acid catabolic rate per hour (Table S2) x 24 hours x depth.

<sup>2</sup> CO<sub>2</sub> consumption flux per year = {[average of DIC rate for dry season (Mar 2020 + May 2020 + Jan 2021) x 182 days + [DIC rate for wet season (Aug 2020)] x 183 days}.

CO<sub>2</sub> production flux per year = CO<sub>2</sub> production rate per day of Jan 2021 x 182 days + CO<sub>2</sub> production rate per day of Aug 2020 x 183 days.

<sup>3</sup> River surface area was assumed to be 0.47% of the catchment area (following Raymond et al., 2013).

<sup>4</sup> Net emission= [CO<sub>2</sub> production flux per year (Leu) - CO<sub>2</sub> consumption flux per year] x river surface area.

<sup>5</sup> Total yield was sum of net emission from individual tributary.

Table S6. River hydraulic parameters and estimates of CO<sub>2</sub> exchange fluxes at the air-river interface.

| Site  | Time     | Velocity<br>(m s <sup>-1</sup> ) | Slope<br>(m m <sup>-1</sup> ) | $\epsilon_D^1$<br>(m <sup>2</sup> s <sup>-3</sup> ) | $k_{600}$<br>(m d <sup>-1</sup> ) | T (°C) | ScCO <sub>2</sub> <sup>2</sup> | kCO <sub>2</sub><br>(m d <sup>-1</sup> ) | Measured pCO <sub>2</sub><br>in river<br>(atm) | $\Delta$ CO <sub>2</sub> <sup>3</sup><br>(atm) | Flux<br>(mol m <sup>-2</sup> d <sup>-1</sup> ) | Tributary rate <sup>4</sup><br>(mole yr <sup>-1</sup> ) | Total rate <sup>5</sup><br>(mole yr <sup>-1</sup> ) |
|-------|----------|----------------------------------|-------------------------------|-----------------------------------------------------|-----------------------------------|--------|--------------------------------|------------------------------------------|------------------------------------------------|------------------------------------------------|------------------------------------------------|---------------------------------------------------------|-----------------------------------------------------|
| CWL01 | Jan 2020 | 1.60                             | 0.013                         | 0.013                                               | 4.8                               | 20.8   | 576.35                         | 4.94                                     | 1.09E-02                                       | 3.57E-04                                       | 1.76                                           | 1.81E+09                                                | 3.15E+09                                            |
| MLL01 |          | 1.30                             | 0.097                         | 0.076                                               | 29.8                              | 12.8   | 878.33                         | 24.61                                    | 1.08E-02                                       | 3.52E-04                                       | 8.67                                           | 3.87E+08                                                |                                                     |
| DL    |          | 1.10                             | 0.0066                        | 0.004                                               | 3.3                               | 27.1   | 423.64                         | 3.90                                     | 4.30E-03                                       | 1.32E-04                                       | 0.52                                           | 2.66E+08                                                |                                                     |
| LY04  |          | 2.20                             | 0.010                         | 0.014                                               | 5.0                               | 21.1   | 568.00                         | 5.10                                     | 5.00E-03                                       | 1.56E-04                                       | 0.80                                           | 6.87E+08                                                |                                                     |
| BNE   |          | 0.40                             | 0.0029                        | 0.0004                                              | 1.4                               | 18.2   | 656.07                         | 1.38                                     | 5.16E-03                                       | 1.62E-04                                       | 0.22                                           | 4.21E+06                                                |                                                     |
| CWL01 | May 2020 | 1.80                             | 0.013                         | 0.015                                               | 5.1                               | 27.3   | 419.25                         | 6.07                                     | 1.95E-03                                       | 5.23E-05                                       | 0.32                                           | 3.26E+08                                                | 8.38E+08                                            |
| MLL01 |          | 0.70                             | 0.097                         | 0.035                                               | 11.7                              | 21.6   | 554.41                         | 12.16                                    | 2.24E-03                                       | 6.21E-05                                       | 0.76                                           | 3.37E+07                                                |                                                     |
| DL    |          | 1.30                             | 0.0066                        | 0.005                                               | 3.5                               | 29.5   | 370.78                         | 4.47                                     | 2.16E-03                                       | 5.96E-05                                       | 0.27                                           | 1.37E+08                                                |                                                     |
| LY04  |          | 1.20                             | 0.010                         | 0.007                                               | 3.9                               | 25.6   | 457.01                         | 4.46                                     | 3.00E-03                                       | 8.79E-05                                       | 0.39                                           | 3.38E+08                                                |                                                     |
| BNE   |          | 0.90                             | 0.0029                        | 0.001                                               | 2.3                               | 25.6   | 457.01                         | 2.58                                     | 2.69E-03                                       | 7.75E-05                                       | 0.20                                           | 3.77E+06                                                |                                                     |
| CWL01 | Jul 2020 | 1.90                             | 0.013                         | 0.016                                               | 5.2                               | 26.7   | 432.47                         | 6.10                                     | 8.37E-03                                       | 2.71E-04                                       | 1.65                                           | 1.70E+09                                                | 4.21E+09                                            |
| MLL01 |          | 1.90                             | 0.097                         | 0.118                                               | 49.9                              | 25.9   | 450.26                         | 57.54                                    | 9.25E-03                                       | 3.01E-04                                       | 17.30                                          | 7.72E+08                                                |                                                     |
| DL    |          | 1.90                             | 0.0066                        | 0.008                                               | 4.1                               | 25.5   | 459.27                         | 4.68                                     | 4.97E-03                                       | 1.55E-04                                       | 0.73                                           | 3.74E+08                                                |                                                     |
| LY04  |          | 2.50                             | 0.010                         | 0.016                                               | 5.2                               | 28.2   | 399.49                         | 6.39                                     | 7.59E-03                                       | 2.44E-04                                       | 1.56                                           | 1.35E+09                                                |                                                     |
| BNE   |          | 1.10                             | 0.0029                        | 0.002                                               | 2.5                               | 28.8   | 386.29                         | 3.06                                     | 9.02E-03                                       | 2.93E-04                                       | 0.90                                           | 1.69E+07                                                |                                                     |
| CWL01 | Oct 2020 | 2.00                             | 0.013                         | 0.017                                               | 5.3                               | 23.3   | 510.90                         | 5.73                                     | 1.69E-03                                       | 4.37E-05                                       | 0.25                                           | 2.57E+08                                                | 1.28E+09                                            |
| MLL01 |          | 1.30                             | 0.097                         | 0.076                                               | 29.8                              | 19.5   | 614.46                         | 29.43                                    | 7.15E-03                                       | 2.29E-04                                       | 6.75                                           | 3.01E+08                                                |                                                     |
| DL    |          | 2.20                             | 0.0066                        | 0.009                                               | 4.3                               | 24.1   | 491.63                         | 4.79                                     | 2.28E-03                                       | 6.36E-05                                       | 0.30                                           | 1.57E+08                                                |                                                     |
| LY04  |          | 1.30                             | 0.010                         | 0.008                                               | 4.0                               | 24.1   | 491.63                         | 4.45                                     | 4.66E-03                                       | 1.44E-04                                       | 0.64                                           | 5.54E+08                                                |                                                     |
| BNE   |          | 1.20                             | 0.0029                        | 0.002                                               | 2.6                               | 24.3   | 486.91                         | 2.83                                     | 4.19E-03                                       | 1.29E-04                                       | 0.36                                           | 6.87E+06                                                |                                                     |
| CWL01 | Jan 2021 | 1.90                             | 0.013                         | 0.016                                               | 5.2                               | 18.5   | 646.13                         | 4.99                                     | 1.60E-03                                       | 4.04E-05                                       | 0.20                                           | 2.07E+08                                                | 9.20E+08                                            |
| MLL01 |          | 1.80                             | 0.097                         | 0.111                                               | 46.4                              | 14.5   | 798.47                         | 40.22                                    | 3.31E-03                                       | 9.87E-05                                       | 3.97                                           | 1.77E+08                                                |                                                     |
| DL    |          | 1.40                             | 0.0066                        | 0.006                                               | 3.6                               | 22.3   | 536.02                         | 3.84                                     | 3.06E-03                                       | 9.02E-05                                       | 0.35                                           | 1.78E+08                                                |                                                     |
| LY04  |          | 2.10                             | 0.010                         | 0.013                                               | 4.9                               | 18.3   | 652.73                         | 4.67                                     | 2.96E-03                                       | 8.67E-05                                       | 0.41                                           | 3.50E+08                                                |                                                     |
| BNE   |          | 1.50                             | 0.0029                        | 0.003                                               | 2.8                               | 21.4   | 559.79                         | 2.90                                     | 4.83E-03                                       | 1.50E-04                                       | 0.44                                           | 8.21E+06                                                |                                                     |

<sup>1</sup>  $\epsilon_D$ , energy dissipation rate.  $\epsilon_D = gSv$  m<sup>2</sup> s<sup>-3</sup>; g, acceleration due to gravity; S, slope; v, velocity.

<sup>2</sup> ScCO<sub>2</sub>: Schmidt number for CO<sub>2</sub> (Wanninkhof 2014).

<sup>3</sup>  $\Delta$ CO<sub>2</sub> = measured pCO<sub>2</sub> - CO<sub>2</sub> (air) (4.1E-04 atm).

<sup>4</sup> Tributary rate = flux x river surface area (1.22E+05 m<sup>2</sup> for MLL01, 2.82E+06 m<sup>2</sup> for CWL01, 1.41E+06 m<sup>2</sup> for DL, 2.36E+06 m<sup>2</sup> for LY04, 5.17E+04 m<sup>2</sup> for BNE).

<sup>5</sup> Total rate = sum of tributary rate for MLL01, CWL01, DL, LY04 and BNE.

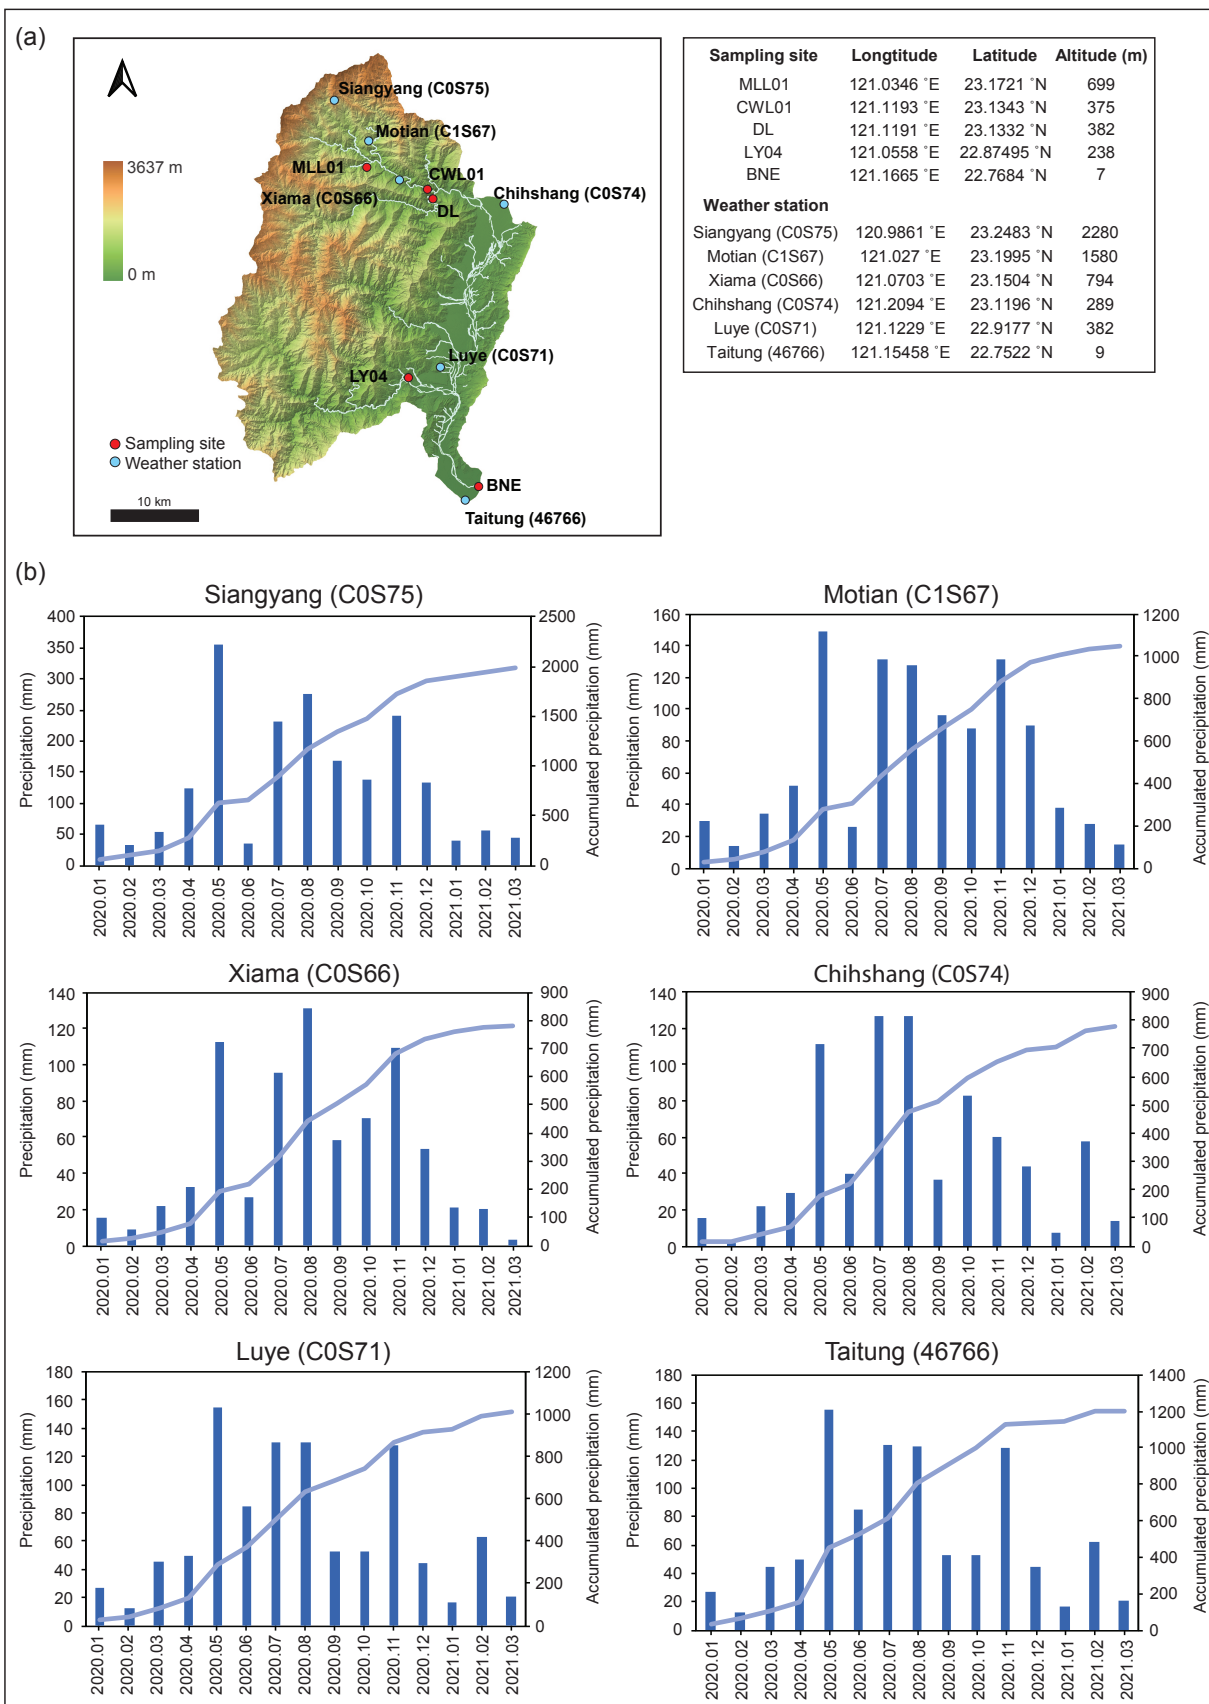

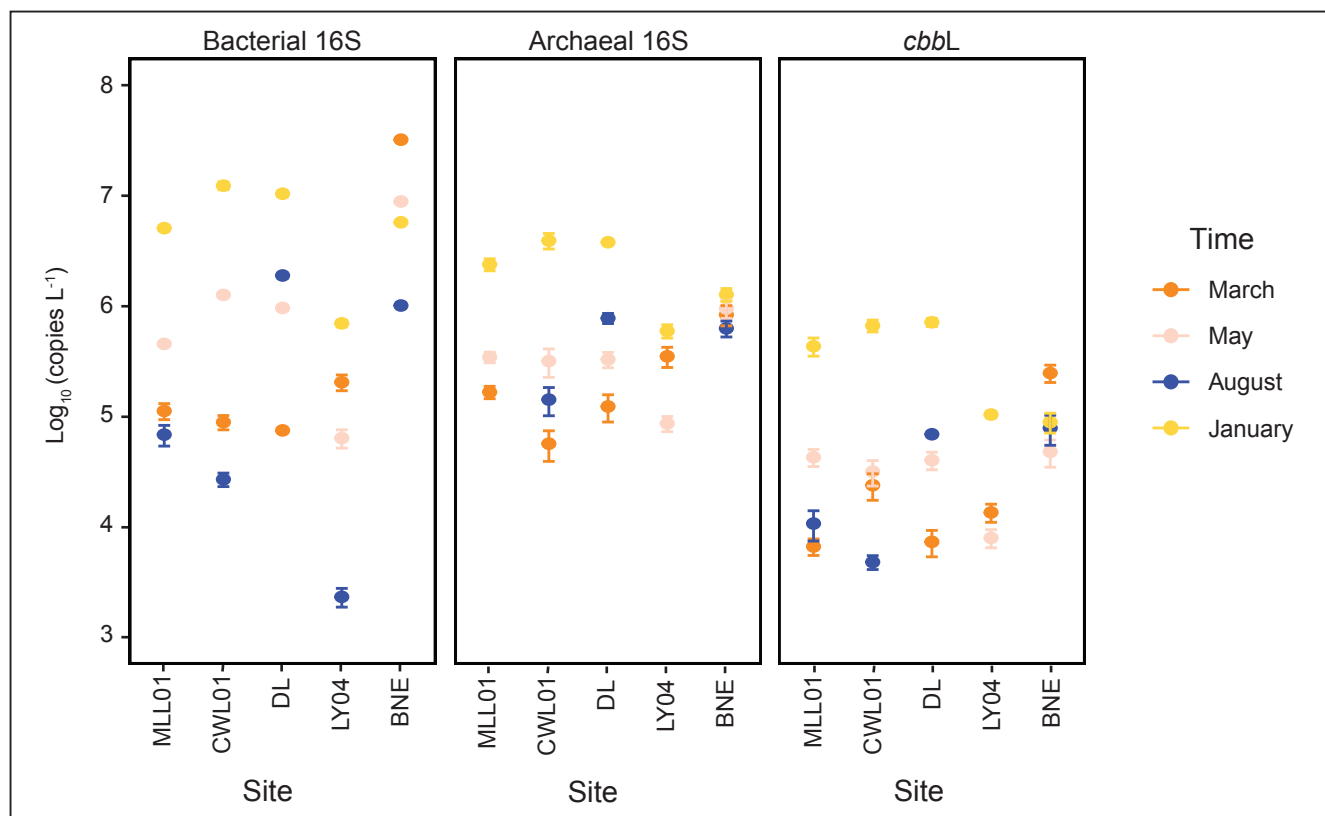

Figure S2. Gene copy numbers of 16S rRNA gene for bacteria and archaea, and functional gene *cbbL* for river samples. Sampling times are presented by colors. Values below the detection limit are not shown (archaeal 16S genes for August samples from MLL01 and LY04; *cbbL* genes for August sample at LY04).



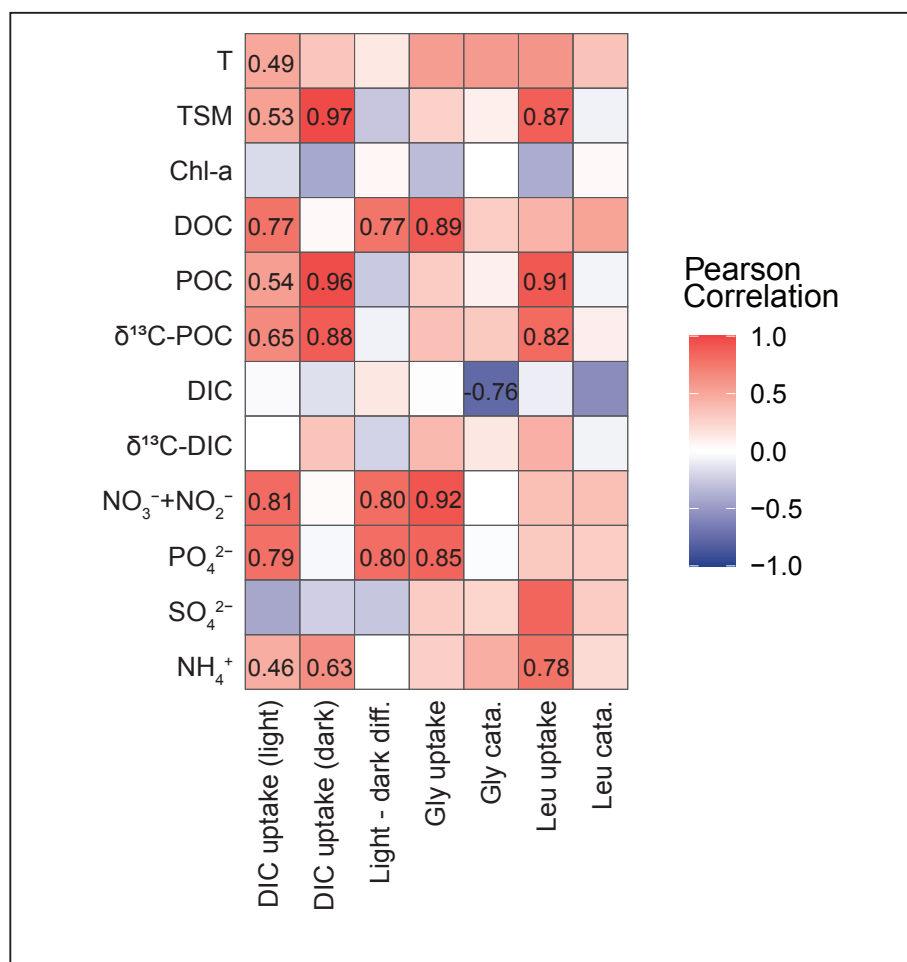

Figure S3. Heatmap showing Pearson correlations between metabolic rates and environmental factors. Environmental variables include nutrients ( $\text{NH}_4^+$ ,  $\text{SO}_4^{2-}$ ,  $\text{PO}_4^{2-}$ ,  $\text{NO}_3^- + \text{NO}_2^-$ ), carbon related entities (DIC, POC, DOC and their  $\delta^{13}\text{C}$  values), chlorophyll-a, total suspended matter, and temperature. Only significant correlation values are displayed ( $p < 0.01$ ).

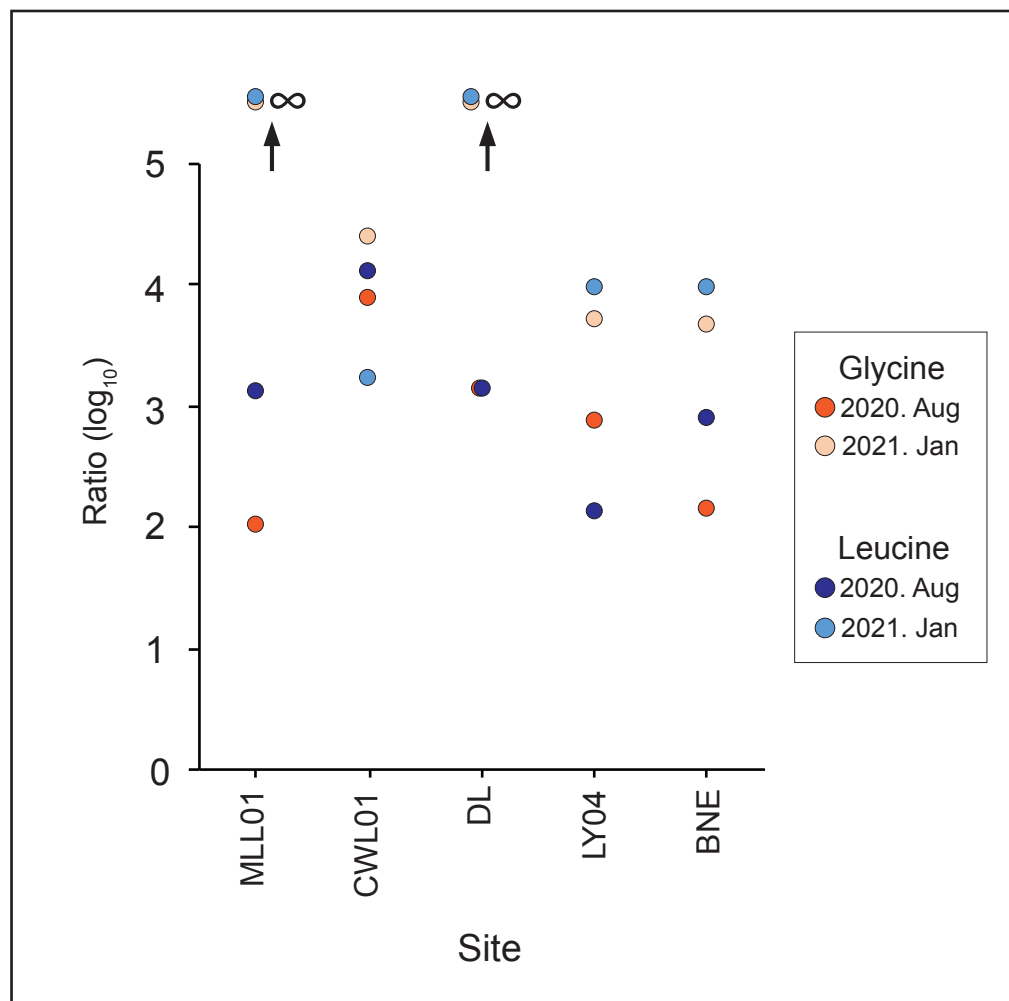

Figure S4. Ratios of catabolism-to-assimilation rates for incubations with amino acids in log<sub>10</sub> scale. Infinite ratios (∞) for sites MLL01 and DL were obtained given that the assimilation rate was below the detection limit.
