# Supplementary material for: Microbial role in CO 2 fluxes along the river-estuary continuum in a rapidly uplifting catchment of eastern Taiwan
Source: Copernicus journal article supplement (doi:10.5194/egusphere-2025-5904), 2025-12-04
Supplement: Supplementary file 1 [file Table_S7_ASVs.xlsx]

## Sheet: Table_S7
ASV No.	domain	phylum	class	order	family	BNE_dry	BNE_wet	CWL01_dry	CWL_wet	DL_dry_1,3,5	DL_July	DL_August	DL_wet	LY04_dry	LY04_wet	MLL01_dry	MLL01_wet
1	Bacteria	Bdellovibrionota	Bdellovibrionia	Bdellovibrionales	Bdellovibrionaceae	0.000111833	0	0	0	0	0	0	0.0295483	0.0289733	0	0	0.000694964
2	Bacteria	Bacteroidota	Bacteroidia	Bacteroidales	Rikenellaceae	0	0	0.000179009	0.000249613	0.000175673	0.000207566	0	0.0264235	0.0233817	0	0	0.00079534
3	Bacteria	Bdellovibrionota	Oligoflexia	0319-6G20	0319-6G20	0	0	4.00906e-05	0	0	0	0	0.0165534	0	0	0	0
4	Bacteria	Proteobacteria	Gammaproteobacteria	Pseudomonadales	Moraxellaceae	0.000517598	0	0	0	0	0	0	0.0112571	0.00139378	0.000278979	0.000348808	0
5	Bacteria	Chloroflexi	Anaerolineae	SBR1031	A4b	1.39792e-05	0	0	0	0	0	0	0.0112086	0.000419273	0	0	0
6	Bacteria	Bacteroidota	Bacteroidia	Chitinophagales	Chitinophagaceae	0	0	0	0	0.000155591	0	0	0.0108014	0.00325774	0.00162835	0.000824455	0.00521008
7	Bacteria	Bacteroidota	Bacteroidia	Chitinophagales	Saprospiraceae	0	0	0.000158684	0	0.000336967	0	0	0.00951658	0.00143307	0.000767192	0.000539066	0.00078034
8	Bacteria	Cyanobacteria	Sericytochromatia	Sericytochromatia	Sericytochromatia	0	0	0	0	0	0.000207566	0	0.00816119	0.00259973	0.00124521	0.000475647	0.00425628
9	Bacteria	Verrucomicrobiota	Omnitrophia	Omnitrophales	Omnitrophales	0	0	0	0	0	0.000259457	0	0.00758379	0.000337747	0	0.00132154	0.0018176
10	Bacteria	Planctomycetota	Planctomycetes	Gemmatales	Gemmataceae	0	0	0	0	2.93015e-05	0	0	0.00710008	0.00298487	0	0	0
11	Bacteria	Bacteroidota	Bacteroidia	Chitinophagales	Saprospiraceae	0	0	0	0	0	0.00124539	0	0.0069794	0	0	0	0
12	Bacteria	Bacteroidota	Bacteroidia	Flavobacteriales	Flavobacteriaceae	0.00192516	0	0	0	0	0	0	0.00697158	0	0	0	0
13	Bacteria	Bacteroidota	Bacteroidia	Bacteroidales	Bacteroidetes_BD2-2	0	0	0	0.000399381	0	0	0	0.00628367	0	0	0	0
14	Bacteria	Myxococcota	bacteriap25	bacteriap25	bacteriap25	0	0	0	0	7.77953e-05	0	0	0.00599346	0	0	0	0
15	Bacteria	Spirochaetota	Leptospirae	Leptospirales	Leptospiraceae	0	0	0	0	0	0	0.000826355	0.00567252	0.00234683	0	0	0
16	Bacteria	Bacteroidota	Kapabacteria	Kapabacteriales	Kapabacteriales	0	0	4.00906e-05	0	0	0	0	0.00529293	0.0013331	0	0	0
17	Bacteria	Bacteroidota	Bacteroidia	Chitinophagales	Saprospiraceae	0	0	0	0	0.0006921	0	0	0.00508501	0.000138536	0	0	0.000641505
18	Bacteria	Chloroflexi	Chloroflexia	Chloroflexales	Roseiflexaceae	0	0	0	0	0	0	0.000330542	0.00498158	0.000512444	0	0	0
19	Bacteria	Desulfobacterota	Desulfovibrionia	Desulfovibrionales	Desulfovibrionaceae	0	0	0.000128528	0	0	0	0	0.00491086	0	0	0	0
20	Bacteria	Proteobacteria	Gammaproteobacteria	Burkholderiales	Comamonadaceae	0.000477692	0	0	0	0	0	0	0.00490286	0	0	0	0
21	Bacteria	Patescibacteria	Microgenomatia	Candidatus_Chisholmbacteria	Candidatus_Chisholmbacteria	0	0	0	0	0	0	0	0.00488793	0	0	0	0
22	Bacteria	Bdellovibrionota	Oligoflexia	053A03-B-DI-P58	053A03-B-DI-P58	0	0	0	0	2.19421e-05	0	0	0.0048778	0.000442565	0	0	0
23	Bacteria	Proteobacteria	Gammaproteobacteria	Diplorickettsiales	Diplorickettsiaceae	0	0	0	0	0	0	0.00126708	0.00485185	0	0	0	0
24	Bacteria	Proteobacteria	Gammaproteobacteria	Nitrosococcales	Methylophagaceae	0	0	0	0.000174729	0	0	0	0.00468943	0.000541409	0	0	0
25	Bacteria	Proteobacteria	Alphaproteobacteria	Rickettsiales	SM2D12	0	0	0	4.99226e-05	3.29131e-05	0	0	0.00439976	0	0	0	0
26	Bacteria	Firmicutes	Symbiobacteriia	Symbiobacteriales	Symbiobacteraceae	0	0	5.34541e-05	0	0	0	0	0.0041419	0.00361842	0	0.00683857	0.00288677
27	Bacteria	Firmicutes	Bacilli	Paenibacillales	Paenibacillaceae	0	0	0	0	0	0.0011935	0	0.00385419	0.00148052	0.000670498	0	0.000307669
28	Bacteria	Proteobacteria	Gammaproteobacteria	Burkholderiales	Chromobacteriaceae	0	0	0	0.000873646	0	0	0	0.0037058	0.000428475	0	0	0
29	Bacteria	Myxococcota	Polyangia	Polyangiales	Phaselicystidaceae	0	0	0.000150707	0	0	0	0	0.00368429	0	0	0.000824455	0
30	Bacteria	Proteobacteria	Alphaproteobacteria	Rhizobiales	Rhizobiales_Incertae_Sedis	0	0	0	0	0	0	0	0.00348206	0.00306484	0.0026503	0.0064965	0.00347482
31	Bacteria	Deinococcota	Deinococci	Thermales	Thermaceae	0	0	0	0	0.000186508	0	0	0.00339587	0.00230447	0.0032669	0	0
32	Bacteria	Firmicutes	Bacilli	Exiguobacterales	Exiguobacteraceae	0	0	0	0	0	0	0	0.00335642	0.00642795	0	0	0
33	Bacteria	Cyanobacteria	Cyanobacteriia	Pseudanabaenales	Pseudanabaenaceae	6.98959e-05	0	0	0	0	0	0	0.00332105	0	0	0	0
34	Bacteria	Bdellovibrionota	Oligoflexia	0319-6G20	0319-6G20	0.000125813	0	0	0	0	0	0	0.00331199	0	0	0	0
35	Bacteria	Patescibacteria	Parcubacteria	Candidatus_Moranbacteria	Candidatus_Moranbacteria	0	0	0	0	5.83465e-05	0	0	0.00331093	0.00125146	0.00175109	0	0.000384586
36	Bacteria	Proteobacteria	Alphaproteobacteria	Rhizobiales	Hyphomicrobiaceae	0	0	4.67724e-05	0	5.48552e-05	0	0	0.00319132	0	0	0	0
37	Bacteria	Bdellovibrionota	Oligoflexia	0319-6G20	0319-6G20	0	0	0	0	0	0	0	0.00316751	0.00176986	0	0.000315648	0
38	Bacteria	Proteobacteria	Gammaproteobacteria	Halothiobacillales	Halothiobacillaceae	0	0	0	0	0	0.000103783	0	0.00307457	0	0	0	0
39	Bacteria	Proteobacteria	Gammaproteobacteria	Burkholderiales	Leeiaceae	0	0	0	0.000424342	0	0	0	0.0030616	0.00111419	0	0	0
40	Bacteria	Myxococcota	bacteriap25	bacteriap25	bacteriap25	0	0	0	0	0	0	0	0.00303689	0	0	0	0
41	Bacteria	Bdellovibrionota	Oligoflexia	Oligoflexales	uncultured	0	0	2.67271e-05	0	0	0	0	0.00299069	0.00200435	0	0.000811193	0
42	Bacteria	Nitrospinota	P9X2b3D02	P9X2b3D02	P9X2b3D02	0	0	0	0	0	0	0	0.00297488	0.000285221	0	0	0
43	Bacteria	Planctomycetota	vadinHA49	vadinHA49	vadinHA49	0	0	0	0	4.38842e-05	0	0	0.00291001	0	0	0	0
44	Bacteria	Proteobacteria	Gammaproteobacteria	Acidiferrobacterales	Acidiferrobacteraceae	0	0	0	0	0	0	0	0.00290592	0	0	0	0
45	Bacteria	Patescibacteria	Microgenomatia	Candidatus_Woesebacteria	Candidatus_Woesebacteria	0	0.00047577	0	0	0	0	0	0.00277762	0.000179282	0	0.0012545	0.0105316
46	Bacteria	Proteobacteria	Alphaproteobacteria	Rickettsiales	SM2D12	0	0	0.000120272	0	0	0	0.000385632	0.0027243	0	0	0	0
47	Archaea	Crenarchaeota	Bathyarchaeia	Bathyarchaeia	Bathyarchaeia	0	0	0	0	0	0	0	0.00267188	0	0	0.000392355	0
48	Bacteria	Bacteroidota	Bacteroidia	Sphingobacteriales	NS11-12_marine_group	0.00073256	0.00030012	0	0	0	0	0	0.00263296	0	0	0	0
49	Bacteria	Patescibacteria	Parcubacteria	Parcubacteria	Parcubacteria	0	0	3.34088e-05	0	0	0	0	0.0026255	0	0	0	0
50	Bacteria	Proteobacteria	Gammaproteobacteria	Enterobacterales	Yersiniaceae	0	0	0.000176316	0	0.00124472	0	0	0.00261679	0	0	0	0
51	Bacteria	Bacteroidota	Bacteroidia	Chitinophagales	Chitinophagaceae	0	0	0	0	0	0	0	0.00256916	0.00217667	0.00274427	9.51294e-05	0
52	Bacteria	Proteobacteria	Gammaproteobacteria	Diplorickettsiales	Diplorickettsiaceae	0	0	0	0	0	0	0.000605994	0.00254268	0	0	0.000983004	0
53	Bacteria	Armatimonadota	Fimbriimonadia	Fimbriimonadales	Fimbriimonadaceae	7.68854e-05	0	0	0	0	0	0	0.00252527	0.00146006	0.00710195	0	0.0142268
54	Bacteria	Bacteroidota	Bacteroidia	Chitinophagales	Saprospiraceae	0	0	0	0	8.79044e-05	0	0	0.00247907	0.00202383	0.0104293	0.00348715	0.00967749
55	Bacteria	Proteobacteria	Gammaproteobacteria	211ds20	211ds20	0.0003105	0	0	0	0	0	0	0.00246609	0.000221283	0	0	0
56	Bacteria	FCPU426	FCPU426	FCPU426	FCPU426	0	0	0	0	3.88976e-05	0	0	0.00246484	0	0	0	0
57	Bacteria	Chloroflexi	Anaerolineae	Anaerolineales	Anaerolineaceae	0	0	0	0	0	0	0	0.0024389	0	0	0	0
58	Bacteria	Bdellovibrionota	Oligoflexia	Silvanigrellales	Silvanigrellaceae	3.49479e-05	0	0	0	0	0	0	0.00242398	0	0.0173879	0	0
59	Bacteria	Firmicutes	Clostridia	Clostridiales	Clostridiaceae	0	0	0.000146999	0	0	0	0	0.00242398	0.000136207	0	0.000392355	0
60	Bacteria	Desulfobacterota	Desulfobulbia	Desulfobulbales	Desulfobulbaceae	0.000125813	0.000730646	0	0	0	0	0	0.00236355	0.00147736	0	0.00408593	0.00205681
61	Bacteria	Bacteroidota	Bacteroidia	Chitinophagales	Saprospiraceae	6.98959e-05	0	0.000107893	0	0.000243359	0	0	0.00233441	0	0	0	0
62	Bacteria	Firmicutes	Clostridia	Oscillospirales	[Eubacterium]_coprostanoligenes_group	0	0	0	0	0	0	0	0.00231379	0	0.0196449	0	0
63	Bacteria	Firmicutes	Clostridia	Clostridia	Gracilibacteraceae	0	0	2.67271e-05	0	0	0	0	0.00231361	0	0	0	0
64	Bacteria	Proteobacteria	Gammaproteobacteria	Gammaproteobacteria_Incertae_Sedis	Unknown_Family	0	0	0	0	7.67973e-05	0	0	0.00230917	0.000244576	0	0	0
65	Bacteria	Campilobacterota	Campylobacteria	Campylobacterales	uncultured	0	0	0	0	0	0	0	0.00230917	0	0	0	0
66	Bacteria	Chloroflexi	Anaerolineae	Caldilineales	Caldilineaceae	0	0	0	0	0	0	0	0.00228625	0.000454212	0.00550983	0	0
67	Bacteria	Patescibacteria	Parcubacteria	Candidatus_Nomurabacteria	Candidatus_Nomurabacteria	6.98959e-05	0	0.000127102	0	0	0	0	0.00226741	0.000600345	0	0	0
68	Bacteria	Proteobacteria	Gammaproteobacteria	Burkholderiales	Nitrosomonadaceae	0	0	0.000176316	0	0	0	0	0.00225728	0.000896777	0	0.00161835	0
69	Bacteria	Bacteroidota	Bacteroidia	Sphingobacteriales	KD3-93	0	0	0	0	0.000164566	0	0	0.00224733	0	0	0	0
70	Bacteria	Planctomycetota	OM190	OM190	OM190	0	0	0	9.98452e-05	0	0	0	0.00223862	0.00019799	0	0	0
71	Bacteria	Patescibacteria	ABY1	Candidatus_Magasanikbacteria	Candidatus_Magasanikbacteria	7.16538e-05	0	0	0	0	0	0	0.00220592	0.000497302	0	0	0
72	Bacteria	Verrucomicrobiota	Omnitrophia	Omnitrophales	Omnitrophaceae	0	0	0	0	0	0	0	0.00219633	0.00130825	0	0.00173757	0
73	Bacteria	Actinobacteriota	Acidimicrobiia	Actinomarinales	uncultured	0	0	0	0.000299536	0	0	0	0.00214674	0.000232929	0.000767192	0	0
74	Bacteria	Firmicutes	Bacilli	Paenibacillales	Paenibacillaceae	0	0	0.000240544	0	0	0	0	0.00213484	0	0	0	0
75	Bacteria	Proteobacteria	Gammaproteobacteria	Acidiferrobacterales	Acidiferrobacteraceae	0	0	0	0.000549149	0	0	0	0.00211049	0.00407996	0	0	0
76	Bacteria	Patescibacteria	ABY1	Candidatus_Uhrbacteria	Candidatus_Uhrbacteria	0	0	2.67271e-05	0	0	0	0	0.0021016	0	0	0.000887874	0.00261214
77	Bacteria	Dependentiae	Babeliae	Babeliales	Babeliales	0	0	0	0	0	0	0	0.0020474	0.00134624	0	0.00418779	0.0016976
78	Bacteria	Campilobacterota	Campylobacteria	Campylobacterales	Sulfurospirillaceae	0	0	4.67724e-05	0	0	0	0	0.00204705	0.00341879	0	0.00140335	0
79	Bacteria	Proteobacteria	Gammaproteobacteria	Burkholderiales	Hydrogenophilaceae	0	0	0	0	0	0	0.00110181	0.00203745	0.00207747	0.00317202	0.00179362	0.00778839
80	Bacteria	Bacteroidota	Bacteroidia	Cytophagales	Spirosomaceae	5.59167e-05	0	0	0	0	0	0	0.00203621	0	0	0	0
81	Bacteria	Proteobacteria	Gammaproteobacteria	Coxiellales	Coxiellaceae	0	0	0	0	0	0	0	0.00203265	0.00118919	0	0	0
82	Bacteria	Proteobacteria	Gammaproteobacteria	Burkholderiales	Gallionellaceae	0	0	0	0	0	0	0	0.00202786	0.000146685	0	0	0
83	Bacteria	Patescibacteria	Gracilibacteria	JGI_0000069-P22	JGI_0000069-P22	5.59167e-05	0	0	0	0	0	0	0.00200351	0.000654085	0	0	0
84	Bacteria	Firmicutes	Clostridia	Clostridiales	Caloramatoraceae	0	0	4.67724e-05	0	0	0	0	0.00198325	0.00159635	0.00944541	0.00326564	0.00800144
85	Bacteria	Proteobacteria	Gammaproteobacteria	Cellvibrionales	Spongiibacteraceae	0	0	0	0.000124807	0	0	0	0.00198325	0	0	0.00123732	0.0101066
86	Bacteria	Proteobacteria	Gammaproteobacteria	Burkholderiales	Hydrogenophilaceae	0	0	0.000236046	0	0	0	0	0.00197916	0	0	0	0
87	Bacteria	Desulfobacterota	Desulfuromonadia	Geobacterales	Geobacteraceae	0	0	0	0.000399381	0	0	0	0.00197721	0.00246949	0.00223183	0.00332032	0.000855341
88	Bacteria	Bacteroidota	Bacteroidia	Cytophagales	Spirosomaceae	0	0	8.81578e-05	0	0.000190459	0	0	0.00194593	0	0	0	0
89	Bacteria	Patescibacteria	Microgenomatia	Candidatus_Amesbacteria	Candidatus_Amesbacteria	0	0	0	0	0	0	0.000165271	0.00194522	0.00027256	0	0	0
90	Bacteria	Proteobacteria	Gammaproteobacteria	Burkholderiales	Comamonadaceae	0.00016076	0	0.000832487	0	0	0	0	0.00192816	0.000301519	0	0	0
91	Bacteria	Bacteroidota	Bacteroidia	Bacteroidales	Paludibacteraceae	0	0	0	0	0	0	0	0.00190257	0	0	0	0
92	Bacteria	Myxococcota	Polyangia	Haliangiales	Haliangiaceae	9.08646e-05	0	0	0	0	0	0	0.00188818	0	0	0	0
93	Bacteria	Firmicutes	Clostridia	Oscillospirales	Oscillospiraceae	0	0	0	0	0	0	0	0.00186809	0	0	0.000369908	0.000923006
94	Archaea	Nanoarchaeota	Nanoarchaeia	Woesearchaeales	Woesearchaeales	0	0	8.01812e-05	0	0	0	0	0.00186774	9.31717e-05	0.000209234	0	0
95	Bacteria	Bacteroidota	Bacteroidia	SM1A07	SM1A07	0	0	0	0	0.000234412	0.000103783	0	0.00186223	0.000974686	0	0.000476431	0
96	Bacteria	Bacteroidota	Bacteroidia	Chitinophagales	uncultured	0	0	3.34088e-05	0	0	0	0	0.00185903	0.0124019	0.0020226	0.00260636	0
97	Bacteria	Chloroflexi	Chloroflexia	Thermomicrobiales	JG30-KF-CM45	0	0	0	0.000149768	0	0	0	0.00181798	0	0.00390571	0	0
98	Bacteria	Bdellovibrionota	Oligoflexia	0319-6G20	0319-6G20	0	0	0	0	4.38842e-05	0	0	0.0018162	0	0	0	0
99	Bacteria	Fibrobacterota	Fibrobacteria	Fibrobacterales	Fibrobacteraceae	1.39792e-05	0	0	0	0	0	0	0.00181354	0.000510777	0	0	0
100	Bacteria	Proteobacteria	Alphaproteobacteria	Rickettsiales	Mitochondria	0	0	0.00115487	0	0	0	0	0.00179274	0	0	0	0
101	Bacteria	Proteobacteria	Gammaproteobacteria	Burkholderiales	Comamonadaceae	0	0	0	0	0.000981599	0	0	0.00179044	0	0	0	0
102	Archaea	Nanoarchaeota	Nanoarchaeia	Woesearchaeales	Woesearchaeales	0	0	0	0	0	0	0	0.00176431	0.00104235	0	0	0
103	Bacteria	Proteobacteria	Gammaproteobacteria	Halothiobacillales	Halothiobacillaceae	0	0	0	0	0	0	0	0.00176431	0	0	0	0
104	Archaea	Nanoarchaeota	Nanoarchaeia	Woesearchaeales	Woesearchaeales	0	0	0	0	0	0	0	0.00176431	0	0	0	0
105	Bacteria	Myxococcota	Polyangia	Blfdi19	Blfdi19	0	0	0	0	0	0	0	0.00176431	0	0	0	0
106	Bacteria	Firmicutes	Clostridia	Clostridia	Hungateiclostridiaceae	0	0	0.000173726	0	0	0	0	0.00176395	0	0	0	0
107	Bacteria	Verrucomicrobiota	Verrucomicrobiae	Pedosphaerales	Pedosphaeraceae	0	0	0	0	0	0	0	0.00176289	0	0	0	0
108	Bacteria	Patescibacteria	Microgenomatia	Candidatus_Beckwithbacteria	Candidatus_Beckwithbacteria	0	8.49589e-05	0	0	0	0	0	0.00173641	0.000186343	0	0	0
109	Bacteria	Proteobacteria	Alphaproteobacteria	Rhizobiales	Rhizobiales_Incertae_Sedis	6.98959e-05	0	0	0	0	0	0	0.00171971	0	0	0	0
110	Bacteria	Patescibacteria	Parcubacteria	GWA2-38-13b	GWA2-38-13b	0	0	0	0	0	0	0	0.00171331	0.000392382	0	0.00202296	0.000641505
111	Bacteria	Desulfobacterota	Desulfobacteria	Desulfobacterales	Desulfosarcinaceae	0.000334384	0.000254877	0	0	0	0	0	0.00170851	0.00808837	0	0.00626821	0.00122955
112	Bacteria	Sva0485	Sva0485	Sva0485	Sva0485	0	0	5.44722e-05	0	0	0	0	0.00168647	0	0	0	0
113	Bacteria	Bdellovibrionota	Bdellovibrionia	Bdellovibrionales	Bdellovibrionaceae	0	0	0	0	0	0	0	0.00168576	0.000151404	0	0	0
114	Bacteria	Deinococcota	Deinococci	Deinococcales	Deinococcaceae	0	0	0	0	0	0	0	0.00168026	0.00516001	0	0	0
115	Bacteria	Verrucomicrobiota	Verrucomicrobiae	Pedosphaerales	Pedosphaeraceae	0	0	0.000254203	0	0.000252835	0	0	0.00166053	0	0	0	0
116	Bacteria	Proteobacteria	Gammaproteobacteria	1013-28-CG33	1013-28-CG33	0	0	0	0	0	0	0.00159762	0.00165271	0.00247786	0.00429632	0.00215348	0.0100206
117	Bacteria	Patescibacteria	WWE3	WWE3	WWE3	0	0	0	0	0	0	0	0.00164987	0.000920855	0	0	0
118	Bacteria	Bacteroidota	Bacteroidia	Chitinophagales	Chitinophagaceae	0	0	0.000526564	0	0	0	0	0.00163458	0	0	0	0
119	Archaea	Nanoarchaeota	Nanoarchaeia	Woesearchaeales	Woesearchaeales	0	0	9.35447e-05	0	0	0	0	0.00162517	0.00130172	0	0.00290399	0.00256985
120	Bacteria	Dependentiae	Babeliae	Babeliales	Babeliales	0	0	0	7.48839e-05	0	0	0	0.00162517	0	0	0	0
121	Bacteria	Fibrobacterota	Fibrobacteria	Fibrobacterales	Fibrobacteraceae	0	0	0	0.000174729	0	0	0	0.00161752	0.000692847	0	0.000919584	0.000588047
122	Bacteria	Proteobacteria	Gammaproteobacteria	Xanthomonadales	Xanthomonadaceae	0	0	0.000100227	0	0	0	0	0.00161432	0.000876775	0	0.000693577	0
123	Bacteria	Bdellovibrionota	Oligoflexia	Oligoflexales	uncultured	0	0	0.00024381	0	0	0	0	0.00161272	0.000460325	0	0.000221969	0
124	Bacteria	Bdellovibrionota	Oligoflexia	Oligoflexales	uncultured	0	0	8.01812e-05	0	0	0	0	0.00160793	0	0	0	0
125	Bacteria	Proteobacteria	Gammaproteobacteria	Diplorickettsiales	Diplorickettsiaceae	0	0	0	0	0	0	0	0.00160668	0	0	0	0
126	Bacteria	Proteobacteria	Gammaproteobacteria	Burkholderiales	Comamonadaceae	0.00256938	0	0.000453935	0	0.000686533	0	0	0.00159318	0.000578591	0	0.00166459	0.000534588
127	Bacteria	Proteobacteria	Alphaproteobacteria	Micavibrionales	uncultured	0	0	0	0	0	0	0	0.00159193	0	0	0	0
128	Bacteria	Proteobacteria	Gammaproteobacteria	B2M28	B2M28	0	0	0	0	0	0	0	0.00158269	0.00298656	0	0	0
129	Bacteria	Planctomycetota	Phycisphaerae	Phycisphaerales	Phycisphaeraceae	0	0	0	0	5.83465e-05	0	0	0.00157914	0	0	0	0
130	Bacteria	Patescibacteria	Parcubacteria	Candidatus_Nomurabacteria	Candidatus_Nomurabacteria	0	0	0.000128248	0	0	0	0	0.00157007	0.00335745	0	0.0022427	0
131	Bacteria	Bacteroidota	Bacteroidia	Chitinophagales	Saprospiraceae	0.000293563	0	0.000132237	0	0.000252334	0.000622697	0	0.00156119	9.31717e-05	0	0	0
132	Bacteria	Bdellovibrionota	Oligoflexia	Silvanigrellales	Silvanigrellaceae	0	0	0	0	0	0	0	0.00155674	0	0	0	0
133	Bacteria	Proteobacteria	Alphaproteobacteria	Rickettsiales	AB1	0	0	0	0	0	0	0.000220361	0.00155443	8.96408e-05	0	0	0
134	Bacteria	Bacteroidota	Bacteroidia	Flavobacteriales	Flavobacteriaceae	0	0	0	0	0.000155591	0	0	0.00154253	0	0	0	0
135	Bacteria	Actinobacteriota	Actinobacteria	Micrococcales	Microbacteriaceae	0.00027616	0.00060024	0	0	0	0	0	0.0015308	0	0	0	0
136	Archaea	Nanoarchaeota	Nanoarchaeia	Woesearchaeales	Woesearchaeales	0	0	0	0	5.48552e-05	0	0	0.0015308	0.00400118	0	0	0
137	Bacteria	Bacteroidota	Bacteroidia	Bacteroidales	Paludibacteraceae	0	0	5.28947e-05	0	0	0	0	0.00151729	0.000309129	0	0	0
138	Bacteria	Actinobacteriota	Acidimicrobiia	Microtrichales	Ilumatobacteraceae	0	0	0	0	0	0	0	0.00151498	0.00136926	0	0.00257417	0.00213835
139	Bacteria	Proteobacteria	Gammaproteobacteria	Burkholderiales	Comamonadaceae	0	0	0.000211579	0	0	0	0	0.00151249	0.00125005	0	0.000952861	0
140	Bacteria	Planctomycetota	Planctomycetes	Gemmatales	Gemmataceae	0	0	0	0	8.79044e-05	0	0	0.00150485	0	0	0	0
141	Bacteria	Proteobacteria	Gammaproteobacteria	Burkholderiales	Nitrosomonadaceae	0	0	0	0	0.000241363	0	0	0.0014814	0.00092112	0	0	0
142	Bacteria	Firmicutes	Bacilli	Bacillales	Bacillaceae	0	0	0	0	0	0.00134918	0	0.00148015	0.00104665	0	0.000672608	0.00144339
143	Bacteria	Desulfobacterota	Desulfuromonadia	Desulfuromonadia	Geopsychrobacteraceae	0	0.000356827	0	0	0	0	0	0.0014798	0	0	0	0
144	Bacteria	Patescibacteria	Gracilibacteria	Absconditabacteriales_(SR1)	Absconditabacteriales_(SR1)	2.79583e-05	0	0	0	0	0	0	0.00147891	0	0	0	0
145	Bacteria	Verrucomicrobiota	Omnitrophia	Omnitrophales	Omnitrophales	0	0	0	7.48839e-05	0	0	0	0.001475	0	0	0.000317098	0
146	Bacteria	Chloroflexi	Anaerolineae	SBR1031	A4b	0	0	0.000105789	4.99226e-05	0	0	0	0.00145989	0.000340518	0	0	0.00187106
147	Bacteria	Spirochaetota	Leptospirae	Leptospirales	Leptospiraceae	0	0	0	4.99226e-05	0	0	0	0.00143235	0	0	0	0
148	Bacteria	Myxococcota	Polyangia	Nannocystales	Nannocystaceae	0	0	0	0	0	0	0	0.00143235	0	0	0	0
149	Bacteria	Proteobacteria	Gammaproteobacteria	Gammaproteobacteria_Incertae_Sedis	Unknown_Family	0	0	0	0	3.88976e-05	0	0	0.00143235	0	0	0	0
150	Bacteria	Proteobacteria	Gammaproteobacteria	Burkholderiales	Comamonadaceae	0	0	0	0	0	0	0.00280961	0.00142701	0	0	0	0.00122955
151	Bacteria	Proteobacteria	Gammaproteobacteria	Legionellales	Legionellaceae	0	0	0	0	0	0	0	0.00142471	0	0	0	0
152	Bacteria	Bacteroidota	Bacteroidia	Sphingobacteriales	env.OPS_17	0	0	0	0	8.77684e-05	0.000674589	0	0.00140711	0.002622	0	0	0
153	Bacteria	Halanaerobiaeota	Halanaerobiia	Halanaerobiales	Halanaerobiaceae	0	0	0	0	0	0	0	0.0014048	0	0	0	0
154	Bacteria	Proteobacteria	Gammaproteobacteria	Xanthomonadales	Xanthomonadaceae	0.000501576	0	0	0	0	0	0	0.00139112	3.49394e-05	0	0	0
155	Bacteria	Patescibacteria	Parcubacteria	Candidatus_Kaiserbacteria	Candidatus_Kaiserbacteria	0	0	0	0	5.86029e-05	0	0	0.00137957	0.000179282	0	0	0
156	Bacteria	Proteobacteria	Gammaproteobacteria	Tenderiales	Tenderiaceae	0	0	0	0	0	0	0	0.00137726	0.000681037	0	0	0
157	Bacteria	Gemmatimonadota	Gemmatimonadetes	Gemmatimonadales	Gemmatimonadaceae	0	0	0	0.000224652	0	0	0	0.00136446	0.000881708	0.000697447	0.000800898	0
158	Bacteria	Proteobacteria	Alphaproteobacteria	Rhodobacterales	Rhodobacteraceae	0	0	0	0	0.000369528	0	0	0.00136322	0.000553124	0	0	0
159	Bacteria	Bdellovibrionota	Oligoflexia	Oligoflexales	uncultured	0	0	0	0	0	0	0.000110181	0.00134918	0	0	0	0
160	Bacteria	Gemmatimonadota	BD2-11_terrestrial_group	BD2-11_terrestrial_group	BD2-11_terrestrial_group	0	0	0	0	0	0	0	0.00133407	0	0	0	0
161	Bacteria	Planctomycetota	Planctomycetes	Pirellulales	Pirellulaceae	0	0	0	4.99226e-05	0	0	0	0.00132323	0.000209636	0	0.000665906	0
162	Bacteria	Bdellovibrionota	Oligoflexia	Oligoflexales	uncultured	0	0	3.63148e-05	0	0	0	0	0.00132217	0.00381169	0	0	0
163	Bacteria	Verrucomicrobiota	Omnitrophia	Omnitrophales	Omnitrophaceae	0	0	0	0	5.48552e-05	0	0	0.00132217	0	0	0	0
164	Bacteria	Proteobacteria	Gammaproteobacteria	Burkholderiales	Sutterellaceae	0	0	0	0	0.000278364	0	0	0.00132217	0	0.00928735	0	0
165	Bacteria	Proteobacteria	Gammaproteobacteria	Alteromonadales	Alteromonadaceae	0	0	0.000114605	0	0	0	0	0.00132092	0.000399309	0	0.0012317	0.000481129
166	Bacteria	Fibrobacterota	Fibrobacteria	Fibrobacterales	Fibrobacteraceae	0	0	0	0	0.000164566	0	0	0.00131293	0.000298089	0	0.000380518	0
167	Bacteria	WS2	WS2	WS2	WS2	0	0.00018691	0	0	0	0	0	0.00131293	0.00322314	0	0.00223642	0
168	Bacteria	Patescibacteria	CPR2	CPR2	CPR2	0	0	0	0	0	0	0	0.00129658	0.00266008	0.00237132	0.00308119	0.000481129
169	Bacteria	Patescibacteria	Gracilibacteria	Absconditabacteriales_(SR1)	Absconditabacteriales_(SR1)	0	0	0	0	0	0	0	0.00129462	0.00737482	0	0.00474158	0
170	Bacteria	Acidobacteriota	Blastocatellia	Blastocatellales	Blastocatellaceae	0	0	0	0	0.000117206	0	0	0.00129462	0.00037457	0	0	0.00222756
171	Bacteria	Proteobacteria	Gammaproteobacteria	Salinisphaerales	Solimonadaceae	5.59167e-05	0	0	0	0	0	0	0.00129338	0	0	0	0
172	Bacteria	Proteobacteria	Gammaproteobacteria	Diplorickettsiales	Diplorickettsiaceae	0	0	0	0	0	0	0	0.00128698	0	0	0	0
173	Bacteria	Elusimicrobiota	Elusimicrobia	Lineage_IV	Lineage_IV	0	0	0	0.000174729	0	0	0	0.00127898	0	0	0	0
174	Bacteria	Planctomycetota	Planctomycetes	Pirellulales	Pirellulaceae	0	0	0	0	0.000153595	0	0	0.00127738	0.000379581	0	0.00081932	0.00156914
175	Bacteria	Proteobacteria	Gammaproteobacteria	Burkholderiales	Comamonadaceae	0	0	0	0	0	0	0	0.00127099	0.000204311	0	0	0
176	Bacteria	Planctomycetota	Planctomycetes	Pirellulales	Pirellulaceae	0	0	0	0.00019969	0	0	0	0.00126903	0.00116298	0	0	0
177	Archaea	Nanoarchaeota	Nanoarchaeia	Woesearchaeales	Woesearchaeales	0	0	0	0	0	0	0	0.00126708	0	0	0	0
178	Bacteria	Bacteroidota	Bacteroidia	Sphingobacteriales	NS11-12_marine_group	0	0	0.000176316	7.48839e-05	0	0	0	0.00126708	0	0	0	0.000499962
179	Bacteria	Patescibacteria	Saccharimonadia	Saccharimonadales	Saccharimonadales	0	0	6.01359e-05	0	0	0	0	0.00126263	0	0	0	0
180	Bacteria	Bacteroidota	Bacteroidia	Cytophagales	Microscillaceae	0	0	0	0.000149768	0	0	0.000881446	0.00125464	0	0	0	0
181	Bacteria	Firmicutes	Bacilli	Brevibacillales	Brevibacillaceae	0	0	0.000388857	0	0	0	0	0.00124539	0	0	0	0
182	Bacteria	Patescibacteria	ABY1	Candidatus_Falkowbacteria	Candidatus_Falkowbacteria	0	0.000543737	0	0	0	0	0	0.00123953	0	0.01123	0	0
183	Bacteria	Bacteroidota	Bacteroidia	Sphingobacteriales	env.OPS_17	0	0	0	0	0	0	0	0.00121945	0	0	0	0
184	Bacteria	Firmicutes	Clostridia	Lachnospirales	Lachnospiraceae	0	0	0	0	8.79044e-05	0	0	0.00121554	0.000583343	0	0	0
185	Bacteria	Proteobacteria	Alphaproteobacteria	Rickettsiales	Mitochondria	0	0	9.07869e-05	0	0	0	0	0.00121234	0	0	0	0
186	Bacteria	Cyanobacteria	Cyanobacteriia	Chloroplast	Chloroplast	0	0	0	0	0	0	0	0.00119795	0	0	0.00125812	0.0015503
187	Bacteria	Proteobacteria	Gammaproteobacteria	Pseudomonadales	Pseudomonadaceae	0	0	0	0	0	0.000570806	0	0.00118515	0	0	0	0
188	Bacteria	Verrucomicrobiota	Verrucomicrobiae	Methylacidiphilales	Methylacidiphilaceae	0	0	0	0	4.39522e-05	0	0	0.00118444	0.000837766	0.000976426	0	0
189	Bacteria	Cyanobacteria	Vampirivibrionia	Vampirovibrionales	Vampirovibrionaceae	0	0	0.000158684	0	0	0	0	0.00118444	0	0	0	0
190	Bacteria	Bacteroidota	Bacteroidia	Cytophagales	Spirosomaceae	0	0	0	0	0.000311181	0	0	0.00118444	0	0	0	0
191	Bacteria	Bacteroidota	Bacteroidia	Cytophagales	Amoebophilaceae	0	0	7.26296e-05	0	0	0	0	0.0011832	0.00126913	0	0.00202161	0.00171068
192	Bacteria	Proteobacteria	Gammaproteobacteria	Burkholderiales	Hydrogenophilaceae	0.000223667	0	0	0	0	0	0	0.0011816	0	0	0	0
193	Bacteria	Patescibacteria	Parcubacteria	Candidatus_Nomurabacteria	Candidatus_Nomurabacteria	0	0	3.52631e-05	0	0	0	0	0.00116756	0	0	0.000242435	0
194	Bacteria	Bdellovibrionota	Oligoflexia	0319-6G20	0319-6G20	0.000286573	0	0	0	0	0	0	0.00116756	0	0	0	0
195	Bacteria	Proteobacteria	Gammaproteobacteria	Pseudomonadales	Pseudomonadaceae	0	0	9.69735e-05	0	0	0	0	0.00116756	0.000945739	0	0.00113284	0.00138993
196	Bacteria	Proteobacteria	Gammaproteobacteria	Legionellales	Legionellaceae	0	0	0	0	0	0	0	0.00116756	0.00105532	0	0.00124844	0
197	Bacteria	Gemmatimonadota	Gemmatimonadetes	Gemmatimonadales	Gemmatimonadaceae	0	0.000203901	0	0	0	0	0	0.00116756	0	0	0	0
198	Bacteria	Proteobacteria	Alphaproteobacteria	Rhizobiales	Rhizobiales_Incertae_Sedis	0	0	0	0	0	0	0	0.00116756	0	0	0	0
199	Bacteria	Proteobacteria	Alphaproteobacteria	Sphingomonadales	Sphingomonadaceae	0	0	0.000405526	0	0	0	0	0.0011569	0	0	0	0
200	Bacteria	Firmicutes	Bacilli	Bacillales	Bacillaceae	0	0	0.000374179	0	0	0	0	0.00114161	0	0	0.00062422	0
201	Bacteria	Verrucomicrobiota	Omnitrophia	Omnitrophales	Omnitrophaceae	0	0	0.000290518	0	0	0	0	0.00114161	0.000204311	0	0	0
202	Bacteria	Proteobacteria	Gammaproteobacteria	Burkholderiales	Methylophilaceae	0	0	0	0	0	0	0	0.00112935	0	0	0	0
203	Bacteria	Bacteroidota	Bacteroidia	Cytophagales	Microscillaceae	0	0	0	0	0	0	0	0.00112935	0	0	0	0
204	Bacteria	Proteobacteria	Alphaproteobacteria	Rickettsiales	SM2D12	0	0	0.000140317	0	0	0	0	0.00111851	0.000186343	0	0.00109658	0
205	Bacteria	Firmicutes	Clostridia	Lachnospirales	Lachnospiraceae	0	0	0.000207135	0	0	0	0	0.00111691	0	0	0	0
206	Bacteria	Chloroflexi	Anaerolineae	SBR1031	SBR1031	0	0	0	0.000149768	0	0	0	0.00110696	0	0	0.000912202	0
207	Bacteria	Verrucomicrobiota	Chlamydiae	Chlamydiales	cvE6	0	0	0	0	0	0	0	0.00110181	0.000203729	0	0	0
208	Bacteria	Proteobacteria	Alphaproteobacteria	Rhizobiales	Methyloligellaceae	0	0.000220893	0	0.000499226	0	0	0	0.00110181	0	0	0	0
209	Bacteria	Verrucomicrobiota	Verrucomicrobiae	Methylacidiphilales	Methylacidiphilaceae	6.29063e-05	0	0	0	0	0	0	0.00109256	0	0	0	0
210	Bacteria	Proteobacteria	Alphaproteobacteria	Rickettsiales	SM2D12	0	0	0	0	0	0	0	0.00108972	0	0	0	0
211	Bacteria	Fibrobacterota	Fibrobacteria	Fibrobacterales	Fibrobacteraceae	0	0	0	0	0	0	0	0.00108972	0.000547384	0	0.0006011	0
212	Bacteria	Firmicutes	Clostridia	Clostridiales	Caloramatoraceae	0	0	0	0.000224652	0	0	0	0.00108972	0.000444395	0	0	0
213	Bacteria	Schekmanbacteria	Schekmanbacteria	Schekmanbacteria	Schekmanbacteria	0	0	0	0	0	0	0	0.00108972	0	0	0	0
214	Bacteria	Fibrobacterota	Fibrobacteria	Fibrobacterales	Fibrobacteraceae	0	0	0	0	7.67973e-05	0	0	0.00108937	0	0	0	0
215	Bacteria	Proteobacteria	Gammaproteobacteria	Diplorickettsiales	Diplorickettsiaceae	0	0	0	0	0	0.000674589	0	0.00107426	0.00163152	0	0.00217258	0.00192452
216	Bacteria	Proteobacteria	Alphaproteobacteria	Rickettsiales	Mitochondria	0	0	0	0	0	0	0	0.00107426	0	0	0	0
217	Bacteria	Proteobacteria	Gammaproteobacteria	Alteromonadales	Alteromonadaceae	0	0	0.000273289	0	0	0	0	0.00107142	0.000529049	0	0	0
218	Bacteria	Bdellovibrionota	Oligoflexia	Silvanigrellales	Silvanigrellaceae	0	0	0	0	0	0	0	0.00107142	0	0	0	0
219	Bacteria	Proteobacteria	Alphaproteobacteria	Rickettsiales	SM2D12	0	0	0	0	9.87394e-05	0	0	0.00106822	0.000567112	0	0.00104642	0.00120801
220	Archaea	Nanoarchaeota	Nanoarchaeia	Woesearchaeales	CG1-02-57-44	0	0	1.76316e-05	0	0	0	0	0.00106377	0.00119181	0	0	0
221	Bacteria	Planctomycetota	Phycisphaerae	MSBL9	SG8-4	0	0	0	0.000174729	0	0	0	0.00106377	0	0	0.00110984	0
222	Bacteria	Dependentiae	Babeliae	Babeliales	Babeliales	0	0	0	0	0	0.000259457	0	0.00105347	0.000592234	0	0.000161835	0
223	Bacteria	Chloroflexi	Anaerolineae	Anaerolineales	Anaerolineaceae	0	0	0	0	0	0	0	0.00104672	0.000309668	0	0	0
224	Bacteria	Desulfobacterota	Desulfobacteria	Desulfatiglandales	Desulfatiglandaceae	0	0	0	0.000124807	0	0	0	0.00103907	0	0	0	0
225	Bacteria	Acidobacteriota	Vicinamibacteria	Vicinamibacterales	Vicinamibacteraceae	0	0	0.000212418	0	0	0	0	0.00103783	0	0	0	0
226	Bacteria	Cyanobacteria	Cyanobacteriia	Thermosynechococcales	Thermosynechococcaceae	0	0	0.000179996	0	0	0	0	0.00103783	0.000646985	0	0	0
227	Bacteria	Actinobacteriota	Thermoleophilia	Gaiellales	uncultured	0	0	0	4.99226e-05	0	0	0	0.00103783	0	0	0.0016172	0
228	Bacteria	Proteobacteria	Alphaproteobacteria	Rhizobiales	A0839	0.00016775	0	0	0	0	0	0	0.00103783	0	0	0	0
229	Bacteria	Cyanobacteria	Vampirivibrionia	Gastranaerophilales	Gastranaerophilales	0	0	0	0	0	0	0	0.00103783	0	0	0	0
230	Bacteria	Bacteroidota	Bacteroidia	Cytophagales	Cyclobacteriaceae	0	0	0	0	0.000274276	0	0	0.00101917	0.00047625	0	0	0
231	Bacteria	LCP-89	LCP-89	LCP-89	LCP-89	0	0	0	0	0	0	0	0.00101917	0.00204736	0	0	0
232	Bacteria	Bacteroidota	Bacteroidia	Cytophagales	Amoebophilaceae	0	0	0	0	0	0	0	0.00101917	0	0	0	0
233	Bacteria	Actinobacteriota	WCHB1-81	WCHB1-81	WCHB1-81	0	0.000271868	0	0	0	0	0	0.00101793	0.000139758	0	0	0
234	Bacteria	Verrucomicrobiota	Verrucomicrobiae	Methylacidiphilales	Methylacidiphilaceae	0	0	6.01359e-05	0	0	0	0	0.00101633	0	0	0	0
235	Bacteria	Patescibacteria	Parcubacteria	Candidatus_Azambacteria	Candidatus_Azambacteria	0	0	0	0	0	0	0	0.00101633	0.000484432	0	0.000697615	0.000872257
236	Bacteria	Bdellovibrionota	Oligoflexia	0319-6G20	0319-6G20	0	0	6.17104e-05	0	0	0	0	0.00101188	0	0	0	0
237	Bacteria	Firmicutes	Clostridia	Peptostreptococcales-Tissierellales	Peptostreptococcaceae	0	0	0.000105789	0	0	0	0	0.00101188	0	0	0	0
238	Archaea	Crenarchaeota	Nitrososphaeria	Nitrosopumilales	Nitrosopumilaceae	0	0.000628696	0	0	0	0	0	0.00101188	0	0	0	0
239	Bacteria	Acidobacteriota	Vicinamibacteria	Vicinamibacterales	Vicinamibacteraceae	0	0	0	0	0	0	0.000771265	0.00100158	0.000204311	0	0.000311793	0
240	Bacteria	Proteobacteria	Alphaproteobacteria	Rhizobiales	A0839	0	0	0	0.000249613	7.77953e-05	0.000207566	0	0.000998379	0.000548418	0	0	0
241	Bacteria	Bacteroidota	Bacteroidia	Cytophagales	Microscillaceae	0	0	0	0	0.000175537	0	0	0.00099358	0.00150444	0	0.000716697	0
242	Bacteria	Desulfobacterota	Desulfuromonadia	Desulfuromonadia	Desulfuromonadaceae	0	0	0	9.98452e-05	0	0	0	0.000991626	0.000260773	0	0.00271846	0.000855341
243	Bacteria	Myxococcota	Polyangia	Haliangiales	Haliangiaceae	0	0	0.000299736	0	0	0	0	0.000991626	0.000823065	0.00817981	0	0.0125308
244	Bacteria	Proteobacteria	Alphaproteobacteria	Sphingomonadales	Sphingomonadaceae	8.3875e-05	0	0	0	0	0	0	0.000990381	0	0	0	0
245	Bacteria	Firmicutes	Clostridia	Clostridiales	Clostridiaceae	0	0	7.34994e-05	0	0	0	0	0.000985937	0	0	0	0
246	Bacteria	Chloroflexi	Anaerolineae	Anaerolineales	Anaerolineaceae	0	0	0	0.000673955	0	0	0	0.000985937	0	0	0	0
247	Bacteria	Cyanobacteria	Cyanobacteriia	Chloroplast	Chloroplast	0	0	2.64473e-05	0	0	0	0	0.000985583	0.000959922	0	0.0013817	0.00160376
248	Bacteria	Aquificota	Aquificae	Aquificales	Aquificaceae	0	0	0	0	0	0	0	0.000964081	0.000700862	0	8.4076e-05	0
249	Bacteria	Proteobacteria	Alphaproteobacteria	Rickettsiales	SM2D12	0	0	0.000153681	0	0	0	0	0.000964081	0	0	0	0
250	Bacteria	Proteobacteria	Alphaproteobacteria	Rickettsiales	Mitochondria	0	0	0	0	0	0.00108972	0	0.000961237	0	0	0	0
251	Bacteria	Proteobacteria	Alphaproteobacteria	Micavibrionales	uncultured	0	0	0.000237291	0	0	0	0	0.000959992	0.000909727	0	0	0
252	Bacteria	Proteobacteria	Gammaproteobacteria	Acidiferrobacterales	Acidiferrobacteraceae	0.000405396	0.000633587	0.000381037	0.00254605	0.000351074	0.00238701	0.0017078	0.000959992	0	0	0	0
253	Bacteria	Firmicutes	Clostridia	Lachnospirales	Defluviitaleaceae	0	0	0	0	0	0	0	0.000959992	0.00347628	0	0.000994128	0
254	Bacteria	Firmicutes	Clostridia	Clostridiales	Clostridiaceae	0.0003105	0	0.000322579	0.00019969	0	0.000467023	0	0.000959992	0	0	0	0
255	Bacteria	Latescibacterota	Latescibacteria	Latescibacterales	Latescibacteraceae	0	0	0	0	0	0	0	0.000959992	0	0	0	0
256	Bacteria	Proteobacteria	Alphaproteobacteria	Ambiguous_taxa	Ambiguous_taxa	0	0	0.000316073	0.000599071	0	0	0.000550903	0.000959992	0	0	0	0
257	Bacteria	Patescibacteria	Gracilibacteria	Absconditabacteriales_(SR1)	Absconditabacteriales_(SR1)	0	0	0	0.000299536	0	0	0	0.000959637	0	0	0	0
258	Bacteria	Cyanobacteria	Cyanobacteriia	Chloroplast	Chloroplast	0	0	0	0	0	0	0	0.00093849	0	0	0	0
259	Bacteria	Myxococcota	Polyangia	Polyangiales	Sandaracinaceae	0	0	0	0	0	0	0	0.000936536	0.00126519	0	0	0
260	Bacteria	Bacteroidota	Bacteroidia	Chitinophagales	Saprospiraceae	0	0	0.000126114	0	0	0	0	0.000934046	0	0	0	0
261	Bacteria	WS2	WS2	WS2	WS2	0	0	0	0	5.86029e-05	0	0	0.000934046	0.000541171	0	0	0
262	Bacteria	Proteobacteria	Gammaproteobacteria	Diplorickettsiales	Diplorickettsiaceae	0	0	0	0	0	0	0	0.000934046	0	0	0	0
263	Bacteria	Bdellovibrionota	Bdellovibrionia	Bdellovibrionales	Bdellovibrionaceae	0	0	0.000106908	0	0	0	0	0.000934046	0	0	0	0
264	Bacteria	Verrucomicrobiota	Verrucomicrobiae	Opitutales	Opitutaceae	0.000237646	0.00110044	0	0.000898607	0.000351074	0	0.00143235	0.000934046	0	0	0	0
265	Bacteria	Spirochaetota	Brachyspirae	Brachyspirales	Brachyspiraceae	4.77692e-05	0	0	0	0	0	0	0.000917342	0.000875174	0	0	0
266	Bacteria	Proteobacteria	Gammaproteobacteria	Pseudomonadales	Pseudomonadaceae	0.00026273	0	0	0.00147272	0.000234412	0	0	0.000915743	0	0	0	0
267	Bacteria	Bacteroidota	Bacteroidia	Chitinophagales	Saprospiraceae	0	0	0	0	0	0	0	0.000908991	0.000778646	0.00146464	0	0
268	Bacteria	Cyanobacteria	Cyanobacteriia	Chloroplast	Chloroplast	0	0	0	0	0	0	0	0.000908991	0	0	0.000252228	0
269	Bacteria	NB1-j	NB1-j	NB1-j	NB1-j	0	0	0	0	0	0	0	0.000908991	0	0	0	0
270	Bacteria	Proteobacteria	Alphaproteobacteria	Rickettsiales	Mitochondria	0	0	0.000308552	7.48839e-05	0	0	0	0.000908991	0	0	0	0
271	Bacteria	GAL15	GAL15	GAL15	GAL15	0	0	0	0	0	0	0	0.000908991	0	0	0	0
272	Bacteria	Planctomycetota	BD7-11	BD7-11	BD7-11	0	0	0	0	0	0	0	0.000908991	0	0	0	0
273	Bacteria	Chloroflexi	Anaerolineae	Anaerolineales	Anaerolineaceae	2.09688e-05	0	0	0	0	0	0	0.0009081	0	0	0	0.0015768
274	Bacteria	Myxococcota	Polyangia	mle1-27	mle1-27	0	0	0	0	4.39522e-05	0	0	0.0009081	0	0	0	0
275	Bacteria	Patescibacteria	ABY1	Candidatus_Magasanikbacteria	Candidatus_Magasanikbacteria	0	0	0	0	0	0	0	0.000892996	0	0	0	0
276	Bacteria	Planctomycetota	Planctomycetes	Planctomycetales	Schlesneriaceae	0	0	0.00011359	0	0	0	0	0.000882155	0	0	0	0
277	Bacteria	Myxococcota	Myxococcia	Myxococcales	27F-1492R	0	0	0	0	0	0.000103783	0	0.000882155	0.00067067	0	9.51294e-05	0
278	Bacteria	Patescibacteria	Microgenomatia	Candidatus_Amesbacteria	Candidatus_Amesbacteria	0	0	0	0	0	0	0	0.000882155	0	0	0	0
279	Bacteria	Firmicutes	Bacilli	Mycoplasmatales	Mycoplasmataceae	0	0	0	0	0	0	0	0.000882155	0	0	0	0
280	Bacteria	Actinobacteriota	Actinobacteria	Frankiales	Sporichthyaceae	0	0.000867013	0	0	0	0	0	0.000882155	0	0	0	0
281	Bacteria	Desulfobacterota	Desulfovibrionia	Desulfovibrionales	Desulfovibrionaceae	0	0	0	0	0	0	0	0.000882155	0	0	0	0
282	Bacteria	Proteobacteria	Alphaproteobacteria	Rhodobacterales	Rhodobacteraceae	0	0	0	0	0	0	0	0.000882155	0	0	0	0
283	Bacteria	NB1-j	NB1-j	NB1-j	NB1-j	0	0	0	0	9.72441e-05	0	0	0.000882155	0	0	0	0
284	Bacteria	Bacteroidota	Bacteroidia	Bacteroidales	Tannerellaceae	0	0	0.000130382	0.000149768	7.32536e-05	0	0	0.000881446	0	0	0	0
285	Bacteria	Firmicutes	Bacilli	Bacillales	Marinococcaceae	0	0	6.01359e-05	0	0	0	0	0.000881446	0.00181697	0	0.000475647	0
286	Bacteria	Bacteroidota	Bacteroidia	Cytophagales	Microscillaceae	0	0	0	0	0	0	0	0.000881446	0.00049281	0	0	0
287	Bacteria	Bdellovibrionota	Bdellovibrionia	Bacteriovoracales	Bacteriovoracaceae	0	0	0.00027014	0	0	0	0	0.000881446	0	0	0.000761035	0
288	Bacteria	Nitrospirota	Nitrospiria	Nitrospirales	Nitrospiraceae	0	0	2.67271e-05	0	0	0	0	0.000881446	0	0	0	0
289	Bacteria	Proteobacteria	Alphaproteobacteria	uncultured	uncultured	0	0	0	0.000299536	0	0	0	0.000856209	0	0	0	0
290	Bacteria	Cyanobacteria	Cyanobacteriia	Leptolyngbyales	Leptolyngbyaceae	0	0	0	0	0	0.000674589	0	0.000856209	0	0	0	0
291	Bacteria	Bacteroidota	Bacteroidia	Cytophagales	Microscillaceae	0	0	0.000261968	0.000174729	0	0	0	0.000856209	0	0	0	0
292	Bacteria	Desulfobacterota	Desulfobulbia	Desulfobulbales	Desulfobulbaceae	0	0.000696663	0	0	0	0	0	0.0008539	0.000806703	0	0	0
293	Bacteria	Firmicutes	Clostridia	Peptostreptococcales-Tissierellales	Fusibacteraceae	0	0	0	0.000324497	0	0	0	0.0008539	0.000224713	0	0.000511446	0
294	Bacteria	Myxococcota	Polyangia	Haliangiales	Haliangiaceae	0	0	0	0	0.000194488	0	0	0.0008539	0	0	0	0
295	Bacteria	Bdellovibrionota	Bdellovibrionia	Bacteriovoracales	Bacteriovoracaceae	0	0	4.40789e-05	0	0	0	0	0.0008539	0	0	0	0
296	Bacteria	Bacteroidota	Bacteroidia	Bacteroidales	SB-5	0	0.000152926	0	0	0	0	0	0.000849457	0.000153233	0	0	0
297	Bacteria	Sumerlaeota	Sumerlaeia	Sumerlaeales	Sumerlaeaceae	0	0	0.000195346	0	0	0	0	0.000849457	0	0	0	0
298	Bacteria	Bacteroidota	Bacteroidia	Chitinophagales	Saprospiraceae	0	0	0.000121846	0	0	0	0	0.000830263	0	0	0	0
299	Bacteria	Proteobacteria	Alphaproteobacteria	Rhizobiales	Xanthobacteraceae	0	0	0	0	0.000190459	0	0	0.000830263	0	0	0	0
300	Bacteria	Proteobacteria	Gammaproteobacteria	Diplorickettsiales	Diplorickettsiaceae	0	0	5.44722e-05	0	0	0	0	0.000830263	0	0	0	0
301	Bacteria	Bacteroidota	Bacteroidia	Sphingobacteriales	KD3-93	0	0	3.34088e-05	0	0	0	0	0.000830263	0	0	0	0
302	Bacteria	Bacteroidota	Bacteroidia	Chitinophagales	Saprospiraceae	0	0	0	0	0	0	0	0.000830263	0	0	0	0
303	Bacteria	Patescibacteria	Parcubacteria	Candidatus_Giovannonibacteria	Candidatus_Giovannonibacteria	0	0	1.76316e-05	0	0	0	0	0.000830263	0	0	0	0
304	Bacteria	Planctomycetota	Planctomycetes	Gemmatales	Gemmataceae	0	0	4.40789e-05	0	0.000141128	0.000518914	0.000440723	0.000828309	0	0	0	0
305	Bacteria	Deinococcota	Deinococci	Deinococcales	Trueperaceae	0	0	0.000106069	0	0	0	0	0.000826355	0.00164267	0	0	0
306	Bacteria	Myxococcota	Polyangia	Haliangiales	Haliangiaceae	0	0	0	0	0	0	0	0.000826355	0.00461945	0	0.00269043	0
307	Bacteria	WPS-2	WPS-2	WPS-2	WPS-2	0	0	0	0	0	0.000570806	0	0.000826355	0	0	0	0
308	Bacteria	Bdellovibrionota	Oligoflexia	Oligoflexales	Oligoflexales	0.000143308	0.00030012	0	0	0.000898662	0.000934046	0.00110181	0.000826355	0.000882587	0.000383142	0	0.00188447
309	Bacteria	Verrucomicrobiota	Omnitrophia	Omnitrophales	Omnitrophaceae	1.39792e-05	0	0	0	0	0	0	0.000826355	0.000256222	0	0	0
310	Bacteria	Patescibacteria	Parcubacteria	Candidatus_Nomurabacteria	Candidatus_Nomurabacteria	0	0	2.67271e-05	0	0	0	0	0.000810361	0	0	0	0
311	Bacteria	Cyanobacteria	Cyanobacteriia	SepB-3	SepB-3	0.000118823	0	0	0	0	0	0	0.000807162	0	0	0	0
312	Bacteria	Chloroflexi	Ktedonobacteria	Ktedonobacterales	Ktedonobacteraceae	0	0.000101951	0	0	0	0	0	0.000805562	0.000232929	0	0	0
313	Bacteria	Bacteroidota	Bacteroidia	Bacteroidales	Prolixibacteraceae	0	0	0	0	0	0	0	0.000805562	0	0	0	0
314	Bacteria	Proteobacteria	Alphaproteobacteria	Caulobacterales	Caulobacteraceae	7.68854e-05	0	0	0.000324497	0.000439522	0.000622697	0	0.000804317	0	0.00104617	0	0.000461503
315	Bacteria	Bacteroidota	Bacteroidia	Chitinophagales	Saprospiraceae	0	0	0	0	0	0	0	0.000804317	0.000114088	0	0	0.00149988
316	Bacteria	Planctomycetota	OM190	OM190	OM190	0	0	0	0	0	0	0	0.000804317	0.000291162	0	0	0
317	Bacteria	Cyanobacteria	Cyanobacteriia	Chloroplast	Chloroplast	0.00275638	0.00176737	0	0	0.000813591	0.00352862	0	0.000804317	0.000209636	0	0	0
318	Bacteria	Spirochaetota	Leptospirae	Leptospirales	Leptospiraceae	0	0	0	0	0	0	0	0.000804317	0	0	0	0
319	Bacteria	Proteobacteria	Gammaproteobacteria	Pseudomonadales	Moraxellaceae	0	0	0	0	0	0	0	0.000804317	0	0	0	0
320	Bacteria	Proteobacteria	Gammaproteobacteria	Burkholderiales	Comamonadaceae	0	0	0.000326184	0	0	0	0	0.000804317	0	0	0	0
321	Bacteria	Proteobacteria	Alphaproteobacteria	Sphingomonadales	Sphingomonadaceae	0	0	0	0	0.00050866	0.00171242	0.00104672	0.000804317	0	0	0	0
322	Archaea	Nanoarchaeota	Nanoarchaeia	Woesearchaeales	SCGC_AAA011-D5	0	0	7.34994e-05	0	0	0	0	0.000800764	0	0	0	0
323	Bacteria	Acidobacteriota	Subgroup_22	Subgroup_22	Subgroup_22	0	0	4.40789e-05	0	0	0	0	0.000799165	0.0013908	0	0.000577981	0
324	Bacteria	Fusobacteriota	Fusobacteriia	Fusobacteriales	Fusobacteriaceae	0	0.000594712	0	0	0	0	0	0.00079881	0.00173243	0	0	0
325	Bacteria	Bacteroidota	Kapabacteria	Kapabacteriales	Kapabacteriales	0	0	0.000472811	0	0.000468823	0.000467023	0.000771265	0.00079881	0.00430263	0	0.00204585	0.00106918
326	Bacteria	Proteobacteria	Gammaproteobacteria	Coxiellales	Coxiellaceae	0	0	0	0	0.000102555	0	0	0.00079881	0.000923783	0	0	0
327	Bacteria	Bacteroidota	Bacteroidia	Chitinophagales	Chitinophagaceae	0	0	0	9.98452e-05	0	0	0	0.00079881	0.000267869	0.000862069	0	0.00161526
328	Bacteria	Bacteroidota	Bacteroidia	Cytophagales	Microscillaceae	0	0	0.000127102	0	0	0	0	0.00079881	0.00264848	0	0.00235897	0
329	Bacteria	Campilobacterota	Campylobacteria	Campylobacterales	Sulfurimonadaceae	0.000132802	0.000967053	0	0.00094853	0.00031816	0	0.00137726	0.00079881	0	0.00347613	0	0
330	Bacteria	Proteobacteria	Gammaproteobacteria	Diplorickettsiales	Diplorickettsiaceae	0	0	0	0	0	0	0.000275452	0.00079881	0.00282293	0	0	0
331	Bacteria	Proteobacteria	Alphaproteobacteria	Rickettsiales	Rickettsiaceae	0	0	1.76316e-05	0	0	0	0	0.00079881	0.000732759	0	0	0
332	Bacteria	Verrucomicrobiota	Verrucomicrobiae	Verrucomicrobiales	Rubritaleaceae	0	0	0.000213817	0	0	0	0	0.00079881	0	0	0	0
333	Bacteria	Proteobacteria	Alphaproteobacteria	Rhizobiales	Hyphomicrobiaceae	0	0	0.000106908	0	9.87394e-05	0	0	0.000795966	0.000607184	0	0.00233277	0
334	Bacteria	Dependentiae	Babeliae	Babeliales	Babeliales	0	0	0	0.000349458	0	0	0	0.000789213	0	0	0	0
335	Bacteria	Proteobacteria	Gammaproteobacteria	Gammaproteobacteria_Incertae_Sedis	Unknown_Family	0	0	0	0	0	0	0	0.000781216	0	0.000574713	0	0
336	Bacteria	Planctomycetota	Phycisphaerae	Phycisphaerales	Phycisphaeraceae	0	0	0	0	0	0	0.000165271	0.000781216	0.000289441	0.00383596	0	0.0184907
337	Bacteria	Proteobacteria	Alphaproteobacteria	Rhodospirillales	uncultured	0	0	7.26296e-05	0	0	0	0	0.000778372	0	0	0	0
338	Bacteria	Desulfobacterota	Desulfuromonadia	Sva1033	Sva1033	0	0	0	0.000449304	0	0	0	0.000778372	0.00165857	0	0.000476431	0
339	Bacteria	Verrucomicrobiota	Verrucomicrobiae	Verrucomicrobiales	Verrucomicrobiaceae	0	0	2.00453e-05	0	0	0	0	0.000778372	0	0	0	0
340	Bacteria	Proteobacteria	Gammaproteobacteria	Burkholderiales	Nitrosomonadaceae	0	0	0.000385305	0.000474265	0	0	0.00154253	0.000778372	0	0.00111592	0	0
341	Bacteria	Bacteroidota	Bacteroidia	Chitinophagales	Chitinophagaceae	0	0	0.000114605	0	0.000293015	0.000985937	0.000936536	0.000778372	0	0	0	0
342	Bacteria	Campilobacterota	Campylobacteria	Campylobacterales	Sulfurimonadaceae	0	0.000152926	0	0	0	0	0	0.000778372	0	0	0	0
343	Bacteria	Bacteroidota	Rhodothermia	Rhodothermales	Rhodothermaceae	0	0	0	0	4.38842e-05	0	0	0.000778017	0.011195	0.00557594	0.00116093	0.000908799
344	Bacteria	Bacteroidota	Bacteroidia	Cytophagales	Microscillaceae	0	0	0	0	0	0	0	0.000773219	0.00128225	0	0.000476431	0.00042767
345	Bacteria	Bacteroidota	Bacteroidia	Flavobacteriales	Cryomorphaceae	0	0.00020008	0	0	0	0	0	0.000771265	0	0.00242249	0	0
346	Bacteria	SAR324_clade(Marine_group_B)	SAR324_clade(Marine_group_B)	SAR324_clade(Marine_group_B)	SAR324_clade(Marine_group_B)	0	0	0.000236046	0	7.67973e-05	0	0	0.000771265	0	0	0.000539066	0
347	Bacteria	Proteobacteria	Gammaproteobacteria	Burkholderiales	Nitrosomonadaceae	0	0	0	0	0.000482726	0	0	0.000771265	0	0	0.000476431	0
348	Archaea	Thermoplasmatota	Thermoplasmata	uncultured	uncultured	0	0	0	0	0	0	0	0.000771265	0	0	0	0
349	Bacteria	Patescibacteria	Gracilibacteria	Candidatus_Peregrinibacteria	Candidatus_Peregrinibacteria	0	0	2.64473e-05	0	0	0	0	0.000771265	0	0	0	0
350	Bacteria	Proteobacteria	Gammaproteobacteria	Burkholderiales	Neisseriaceae	0	0	0	0	0	0	0	0.00077002	0	0	0	0.00305865
351	Bacteria	Proteobacteria	Gammaproteobacteria	Burkholderiales	Comamonadaceae	0	0.000233427	0	0	0	0	0	0.000752426	0.00060362	0	0	0
352	Bacteria	Proteobacteria	Alphaproteobacteria	Paracaedibacterales	Paracaedibacteraceae	0	0	0	0	4.39522e-05	0	0	0.000752426	0	0	0	0
353	Bacteria	Desulfobacterota	Desulfobulbia	Desulfobulbales	Desulfobulbaceae	0	0	0	0.000224652	0	0	0	0.000752071	0	0	0	0
354	Bacteria	Bdellovibrionota	Bdellovibrionia	Bacteriovoracales	Bacteriovoracaceae	0	0	0.0001675	0	0	0	0	0.000750472	0	0	0	0
355	Bacteria	Myxococcota	Polyangia	Haliangiales	Haliangiaceae	0	0	0	0	0.000241363	0	0	0.000745674	0	0	0	0
356	Bacteria	Bacteroidota	Bacteroidia	Cytophagales	Cyclobacteriaceae	0	0	0	0	0.00141879	0.000830263	0	0.000744074	0	0	0	0
357	Bacteria	Proteobacteria	Gammaproteobacteria	Acidiferrobacterales	Acidiferrobacteraceae	0	0	0	0	3.88976e-05	0	0	0.00074372	0	0	0	0
358	Archaea	Nanoarchaeota	Nanoarchaeia	Woesearchaeales	Woesearchaeales	0	0	0	0	0	0	0	0.00074372	0	0	0	0
359	Bacteria	Bacteroidota	Bacteroidia	Cytophagales	MWH-CFBk5	0	0	0.000108944	0	0	0	0	0.00074372	0	0	0	0
360	Bacteria	Proteobacteria	Alphaproteobacteria	Rhizobiales	Rhizobiales_Incertae_Sedis	0	0	0	0	0	0	0	0.000742475	0.000568781	0	0.00159916	0.000106918
361	Bacteria	Bdellovibrionota	Oligoflexia	0319-6G20	0319-6G20	0	0	0.000100227	0	0.000408425	0	0	0.000727725	0.000251784	0.000348724	0	0
362	Bacteria	Bacteroidota	Bacteroidia	Chitinophagales	uncultured	0	0	0	0	0	0	0	0.00072648	0	0	0	0
363	Bacteria	Firmicutes	Bacilli	Bacillales	Bacillaceae	0	0	0	0	0.00161425	0	0	0.000726126	0.00110454	0	0.00211859	0.00604084
364	Bacteria	Patescibacteria	Microgenomatia	Candidatus_Amesbacteria	Candidatus_Amesbacteria	0	0	0	0	0	0	0	0.000718128	0	0	0	0
365	Bacteria	Proteobacteria	Gammaproteobacteria	Burkholderiales	Neisseriaceae	0	0	0	0	0	0	0	0.000716529	0	0.00146464	0	0
366	Bacteria	Myxococcota	Myxococcia	Myxococcales	Myxococcaceae	0	0	0	0	0	0	0	0.000716175	0	0	0	0
367	Bacteria	Firmicutes	Bacilli	Paenibacillales	Paenibacillaceae	0	0	0.000354134	0.000449304	0	0	0	0.000716175	0.000561855	0	0	0
368	Bacteria	Verrucomicrobiota	Omnitrophia	Omnitrophales	Omnitrophales	0	0	0	0.000324497	0	0	0	0.000716175	0.000696112	0	0	0
369	Bacteria	Cyanobacteria	Cyanobacteriia	Leptolyngbyales	Leptolyngbyaceae	0	0	0	0	0	0.000674589	0	0.000716175	0	0	0	0
370	Bacteria	Proteobacteria	Gammaproteobacteria	Diplorickettsiales	Diplorickettsiaceae	0	0	0	0	0	0	0	0.000716175	0	0.00287356	0	0
371	Bacteria	Proteobacteria	Alphaproteobacteria	Sphingomonadales	Sphingomonadaceae	0.000195708	0	0	0	8.77684e-05	0.00207566	0	0.000716175	0	0.00239464	0	0
372	Bacteria	Bacteroidota	Bacteroidia	Sphingobacteriales	AKYH767	0	0	0	0	3.29131e-05	0	0	0.000716175	0	0	0	0
373	Bacteria	Firmicutes	Clostridia	Clostridiales	Clostridiaceae	0.000453807	0	0.000408603	0	0	0.000415132	0	0.000716175	0	0	0	0
374	Bacteria	Proteobacteria	Gammaproteobacteria	Gammaproteobacteria_Incertae_Sedis	Unknown_Family	0	0	3.34088e-05	0	0	0	0	0.000716175	0	0	0	0
375	Bacteria	Bacteroidota	Bacteroidia	Bacteroidales	Rikenellaceae	0	0	8.01812e-05	0	0	0	0	0.000716175	0	0	0	0
376	Bacteria	Planctomycetota	Planctomycetes	Planctomycetales	uncultured	0	0	0	0	0.000274276	0	0	0.000712976	5.70441e-05	0	0	0
377	Bacteria	Proteobacteria	Gammaproteobacteria	Burkholderiales	Hydrogenophilaceae	0	0	0	0	0	0	0	0.000711376	0	0	0	0
378	Bacteria	Firmicutes	Desulfitobacteriia	Desulfitobacteriales	Desulfitobacteriaceae	0	0	0	0	0	0	0	0.000705333	0.000304637	0	0.00111048	0
379	Bacteria	Proteobacteria	Alphaproteobacteria	Rickettsiales	SM2D12	0	0	0	0	0	0	0	0.000703379	0.000321348	0	0.000849579	0
380	Bacteria	Bacteroidota	Bacteroidia	Cytophagales	Spirosomaceae	0	0	4.00906e-05	0	0	0	0	0.000700534	0.000476671	0	0.0014421	0
381	Bacteria	Cyanobacteria	Cyanobacteriia	Cyanobacteriales	Nostocaceae	0	0	0	0.000249613	0	0	0	0.000700534	0.000442565	0	0	0
382	Bacteria	Cyanobacteria	Cyanobacteriia	Cyanobacteriales	Xenococcaceae	0.000489271	0	0	0	0	0	0	0.000700534	0	0	0	0
383	Bacteria	Planctomycetota	Phycisphaerae	Phycisphaerales	Phycisphaeraceae	0	0	0	0	0	0	0	0.000700534	0	0	0	0
384	Bacteria	Bacteroidota	Bacteroidia	Chitinophagales	Saprospiraceae	6.29063e-05	0	0.000163416	0.000324497	0.000102555	0	0	0.000700534	0	0	0	0
385	Bacteria	Bacteroidota	Bacteroidia	Bacteroidales	Prevotellaceae	0	0	0	0	0	0	0	0.000700534	0	0	0	0
386	Bacteria	Proteobacteria	Gammaproteobacteria	Diplorickettsiales	Diplorickettsiaceae	0	0	0	0	2.93015e-05	0	0	0.000700534	0	0	0	0
387	Bacteria	Bdellovibrionota	Bdellovibrionia	Bdellovibrionales	Bdellovibrionaceae	0	0	0	0	2.19421e-05	0	0	0.000695382	0	0	0	0
388	Bacteria	Proteobacteria	Gammaproteobacteria	Cardiobacteriales	Wohlfahrtiimonadaceae	0	0	4.67724e-05	0	0	0	0	0.000688629	0.000342265	0.000862069	0	0.0015768
389	Bacteria	Planctomycetota	Planctomycetes	Planctomycetales	Rubinisphaeraceae	0	0	6.01359e-05	0	0	0	0	0.000688629	0	0	0	0
390	Bacteria	Desulfobacterota	Desulfobulbia	Desulfobulbales	Desulfurivibrionaceae	0	0	0	0	0	0	0	0.000688629	0	0	0	0
391	Bacteria	Firmicutes	Symbiobacteriia	Symbiobacteriales	Symbiobacteraceae	0	0	8.81578e-05	0	0	0.000311349	0	0.000688629	0	0	0	0
392	Bacteria	Firmicutes	Clostridia	Clostridiales	Clostridiaceae	0	0	0	0	0	0	0	0.000688629	0	0	0	0
393	Bacteria	Firmicutes	Clostridia	Peptostreptococcales-Tissierellales	Peptostreptococcaceae	0	0	0.000220498	0	0	0.00249079	0	0.000688629	0	0	0	0
394	Bacteria	Dependentiae	Babeliae	Babeliales	Vermiphilaceae	0	0	0	9.98452e-05	0	0	0	0.000682586	0	0	0	0
395	Bacteria	Myxococcota	Polyangia	Blfdi19	Blfdi19	0	0	0	0.000149768	0	0.000622697	0.000991626	0.000682232	8.15252e-05	0	0	0
396	Bacteria	Acidobacteriota	Blastocatellia	2025-11-24	2025-11-24	0	0	0	0	0	0	0	0.000674589	0	0	0	0
397	Bacteria	Proteobacteria	Gammaproteobacteria	Enterobacterales	Morganellaceae	0	0	0	0	0	0	0	0.000674589	0	0	0	0
398	Bacteria	Bdellovibrionota	Bdellovibrionia	Bdellovibrionales	Bdellovibrionaceae	0	0	0	0	0	0	0	0.000674589	0.000430919	0	0	0
399	Bacteria	Elusimicrobiota	Elusimicrobia	MVP-88	MVP-88	0	0	7.34994e-05	0	0	0	0	0.000674589	0	0	0	0
400	Bacteria	Planctomycetota	OM190	OM190	OM190	0	0	0	0	0	0	0	0.000674589	0	0	0	0
401	Bacteria	Bacteroidota	Bacteroidia	Flavobacteriales	Crocinitomicaceae	0.00326046	0	0	0	0	0	0	0.000674589	0	0	0	0
402	Bacteria	Bacteroidota	Bacteroidia	Sphingobacteriales	env.OPS_17	0	0	0	0	0	0	0.000220361	0.000674589	0	0	0	0
403	Bacteria	Proteobacteria	Gammaproteobacteria	Chromatiales	Sedimenticolaceae	0	0	0	0	0	0.000259457	0	0.000674589	0	0	0	0
404	Bacteria	Bdellovibrionota	Oligoflexia	Oligoflexales	uncultured	0	0	0	0	3.88976e-05	0	0	0.000674589	0	0	0	0
405	Bacteria	Chloroflexi	Anaerolineae	Anaerolineales	Anaerolineaceae	0	0	0	0.000349458	0	0.000207566	0	0.000671035	0	0	0	0
406	Bacteria	Bdellovibrionota	Oligoflexia	Silvanigrellales	Silvanigrellaceae	0	0	0	0	0	0	0.000165271	0.000667836	0	0	0	0.000481129
407	Bacteria	Bacteroidota	Bacteroidia	Chitinophagales	Saprospiraceae	0	0	7.05262e-05	0.000124807	0	0	0	0.000664638	0	0	0	0
408	Bacteria	Proteobacteria	Alphaproteobacteria	Rhodospirillales	uncultured	0	0	9.69735e-05	0	0	0	0	0.000661084	0	0	0	0
409	Bacteria	Firmicutes	Bacilli	Erysipelotrichales	Erysipelotrichaceae	0	0	0	0	0	0	0.000110181	0.000661084	0.000130387	0	0	0
410	Bacteria	Proteobacteria	Gammaproteobacteria	EC3	EC3	0	0	7.05262e-05	0	0	0	0	0.000661084	0	0.00191571	0	0
411	Bacteria	Fibrobacterota	Fibrobacteria	Fibrobacterales	Fibrobacteraceae	0	0	0	0	4.38842e-05	0	0	0.000654686	0	0	0	0
412	Bacteria	Myxococcota	Polyangia	Polyangiales	Sandaracinaceae	0	0	0	0.000174729	0	0	0	0.000648643	0	0	0	0
413	Bacteria	Planctomycetota	OM190	OM190	OM190	0	0	0	0	3.88976e-05	0	0	0.000648643	0	0	0	0
414	Bacteria	Proteobacteria	Alphaproteobacteria	Micavibrionales	uncultured	0	0	4.67724e-05	0	0	0	0	0.000648643	0	0	0	0
415	Bacteria	Bacteroidota	Bacteroidia	Sphingobacteriales	Lentimicrobiaceae	0	0	0	0.000798762	0	0	0	0.000638692	0	0	0	0
416	Bacteria	Bacteroidota	Bacteroidia	Chitinophagales	Saprospiraceae	0	0	0	4.99226e-05	0	0	0	0.000637092	0	0	0	0
417	Bacteria	Bacteroidota	Bacteroidia	Flavobacteriales	NS9_marine_group	0	0	0	0	9.72441e-05	0	0	0.000635493	0	0	0	0
418	Bacteria	Myxococcota	Myxococcia	Myxococcales	Myxococcaceae	0	0	0	7.48839e-05	0	0	0	0.000633539	0.00203601	0	0.0016836	0.00146222
419	Bacteria	Fusobacteriota	Fusobacteriia	Fusobacteriales	Fusobacteriaceae	0	0.000594712	0	0	0	0	0	0.000633539	0	0	0	0
420	Bacteria	Proteobacteria	Gammaproteobacteria	Burkholderiales	Hydrogenophilaceae	0	0	0	0	0	0.00108972	0.00187307	0.000633539	0.0025505	0	0.00196103	0
421	Bacteria	Myxococcota	Polyangia	mle1-27	mle1-27	0	0	0	0	0	0	0	0.000633539	0	0.00181336	0	0
422	Bacteria	Proteobacteria	Alphaproteobacteria	Rhizobiales	Xanthobacteraceae	0	0	0.000216966	0	0	0	0	0.000633539	0	0.00153257	0	0
423	Bacteria	Proteobacteria	Alphaproteobacteria	Rickettsiales	SM1B06	0	0	0.000262899	0	0	0	0	0.000633539	0	0	0	0
424	Bacteria	Desulfobacterota	Desulfuromonadia	Desulfuromonadia	Geothermobacteraceae	0	0	0.000106908	0	0	0	0	0.000633539	0	0	0	0
425	Bacteria	Latescibacterota	Latescibacteria	Latescibacterales	Latescibacteraceae	0	0	0	0.00019969	0	0	0	0.000633539	0	0	0	0
426	Archaea	Nanoarchaeota	Nanoarchaeia	Woesearchaeales	Woesearchaeales	0	0.000118942	0	0	0	0	0	0.000633539	0	0	0	0
427	Bacteria	Firmicutes	Negativicutes	Veillonellales-Selenomonadales	uncultured	0	0	2.00453e-05	0	0	0	0	0.000632294	0	0	0	0
428	Bacteria	Bacteroidota	Bacteroidia	Cytophagales	Spirosomaceae	0.000245178	0	0	0	0	0	0	0.000622697	0	0	0	0
429	Bacteria	Bacteroidota	Bacteroidia	Chitinophagales	Saprospiraceae	0.00016775	0	0	0	0	0	0	0.000622697	0	0	0	0
430	Bacteria	Bacteroidota	Bacteroidia	Sphingobacteriales	Z4MB62	0	0	0	0	0	0	0	0.000622697	0	0	0	0
431	Bacteria	Bacteroidota	Bacteroidia	Chitinophagales	Saprospiraceae	0.000384427	0	0	0.000998452	0	0	0	0.000622697	0	0	0	0
432	Bacteria	Proteobacteria	Gammaproteobacteria	Burkholderiales	Rhodocyclaceae	0	0	0	0.000648994	0	0	0	0.000622697	0	0	0	0
433	Bacteria	Patescibacteria	Microgenomatia	Candidatus_Woesebacteria	Candidatus_Woesebacteria	0	0	0	0	0	0	0.000275452	0.000622697	0	0	0	0
434	Bacteria	Proteobacteria	Gammaproteobacteria	Burkholderiales	Comamonadaceae	0.000484081	0	0	0	0	0	0	0.000622697	0	0	0	0
435	Bacteria	Proteobacteria	Gammaproteobacteria	Burkholderiales	Hydrogenophilaceae	0	0	0	0	0	0	0.00352578	0.000622697	0	0	0	0
436	Bacteria	Proteobacteria	Gammaproteobacteria	Burkholderiales	Hydrogenophilaceae	0	0	0	0	0	0	0	0.000622697	0	0	0	0
437	Bacteria	Planctomycetota	Planctomycetes	Gemmatales	Gemmataceae	0	0	0	0.00019969	0	0	0	0.000619144	0.000160388	0	0.000251026	0
438	Bacteria	Proteobacteria	Alphaproteobacteria	Rhizobiales	KF-JG30-B3	0	0.000118942	0	0	0	0	0	0.000605994	0	0	0	0.000748423
439	Bacteria	Firmicutes	Bacilli	Bacillales	Planococcaceae	0	0	0	0	0	0	0	0.000605994	0.00139563	0	0.00137741	0
440	Bacteria	Planctomycetota	BD7-11	BD7-11	BD7-11	0	0	0	0	0	0	0	0.000605994	0.000340518	0	0.00107813	0
441	Bacteria	Firmicutes	Bacilli	Paenibacillales	Paenibacillaceae	0	0	0.000123421	0	0	0	0	0.000605994	0	0	0	0
442	Bacteria	Elusimicrobiota	Lineage_IIc	Lineage_IIc	Lineage_IIc	0	0.000152926	0	0	0	0	0	0.000605994	0	0	0	0
443	Archaea	Nanoarchaeota	Nanoarchaeia	Woesearchaeales	Woesearchaeales	0	0	0	0	2.19421e-05	0	0	0.000605994	0	0.0520579	0.000112101	0
444	Bacteria	Bacteroidota	Bacteroidia	Bacteroidales	Dysgonomonadaceae	0	0	0.000158684	0	0.000252835	0	0	0.000605994	0	0.00277778	0	0
445	Bacteria	Bacteroidota	Bacteroidia	Cytophagales	Spirosomaceae	0	0	0.000258351	0	0.000798427	0	0	0.000605994	0	0.00223183	0	0
446	Bacteria	Gemmatimonadota	BD2-11_terrestrial_group	BD2-11_terrestrial_group	BD2-11_terrestrial_group	0	0	0	0	0	0	0	0.000605994	0.000186343	0.00105364	0	0.000692254
447	Bacteria	Bacteroidota	Bacteroidia	Bacteroidales	Marinifilaceae	0	0	0	0	4.38842e-05	0	0	0.000605994	0.000862132	0	0.0030209	0.00176414
448	Bacteria	Cyanobacteria	Sericytochromatia	Sericytochromatia	Sericytochromatia	0	0	0	0	0	0	0	0.000605994	0.000544829	0	0.000504456	0
449	Bacteria	Bacteroidota	Bacteroidia	Bacteroidales	Marinilabiliaceae	0	0	0	0.000673955	0	0	0	0.000605994	0	0	0	0
450	Bacteria	Bacteroidota	Kapabacteria	Kapabacteriales	Kapabacteriales	0	0	0	0.00019969	0	0	0	0.000605994	0	0	0	0
451	Bacteria	Proteobacteria	Alphaproteobacteria	Rickettsiales	SM2D12	0	0	0.000141052	0.000524188	0	0	0	0.000596752	0.000471598	0	0.00208287	0.000962258
452	Bacteria	Bacteroidota	Bacteroidia	Chitinophagales	Saprospiraceae	0	0	0.000475868	0	0	0	0	0.000596752	0	0	0	0
453	Bacteria	Chloroflexi	Anaerolineae	SBR1031	A4b	0	0	2.64473e-05	0	0	0	0	0.000596752	0	0	0	0
454	Bacteria	Deinococcota	Deinococci	Deinococcales	Deinococcaceae	0	0	0	0	0	0	0.000165271	0.000596752	0.0016776	0	0	0
455	Archaea	Nanoarchaeota	Nanoarchaeia	Woesearchaeales	Woesearchaeales	0	0	3.34088e-05	0	0	0	0	0.000596752	0.000385275	0	0	0
456	Bacteria	Patescibacteria	Parcubacteria	Candidatus_Nomurabacteria	Candidatus_Nomurabacteria	0	0	0	0	0	0	0	0.000596752	0	0	0	0
457	Bacteria	Bacteroidota	Bacteroidia	Bacteroidales	Prevotellaceae	0	0	0	0	9.72441e-05	0	0	0.000596752	0	0	0	0
458	Bacteria	Patescibacteria	Parcubacteria	Parcubacteria	Parcubacteria	0	0	0	7.48839e-05	0	0	0	0.000596752	0	0	0	0
459	Bacteria	Bacteroidota	Bacteroidia	Bacteroidales	Prolixibacteraceae	0	0	6.17104e-05	0	7.32536e-05	0	0	0.000589999	0	0	0	0
460	Bacteria	Proteobacteria	Alphaproteobacteria	Rickettsiales	Rickettsiaceae	0	0	0.000105789	0	0	0	0	0.0005884	0	0	0.000126839	0
461	Bacteria	Patescibacteria	Parcubacteria	Candidatus_Nomurabacteria	Candidatus_Nomurabacteria	0	0	0	7.48839e-05	0	0	0	0.0005868	6.51933e-05	0.000287356	0.000392394	0.00697488
462	Bacteria	Firmicutes	Clostridia	Lachnospirales	Lachnospiraceae	0	0	0	7.48839e-05	0	0	0	0.0005868	0.000170259	0	0	0
463	Bacteria	Bacteroidota	Bacteroidia	Chitinophagales	uncultured	0	0	0.000141052	9.98452e-05	0.000102555	0	0	0.000583601	0	0	0	0
464	Bacteria	Planctomycetota	Phycisphaerae	Pla1_lineage	Pla1_lineage	0	0	0	4.99226e-05	0	0	0	0.000578449	0.00174528	0	0.00333091	0.000908799
465	Bacteria	Proteobacteria	Gammaproteobacteria	Burkholderiales	Alcaligenaceae	0	0	0	0	8.79044e-05	0	0	0.000578449	0	0.00258621	0	0
466	Bacteria	Firmicutes	Bacilli	Bacillales	Bacillaceae	0	0.000594712	0	0.00132295	0	0	0	0.000578449	0	0.000627703	0	0
467	Bacteria	Dependentiae	Babeliae	Babeliales	Babeliales	0	0	0	0	0	0	0	0.000578449	0	0	0.000554862	0
468	Bacteria	Proteobacteria	Gammaproteobacteria	Burkholderiales	Chitinimonadaceae	0	0	0	0.00037442	0	0	0	0.000578449	0	0	0	0
469	Bacteria	Patescibacteria	ABY1	Candidatus_Magasanikbacteria	Candidatus_Magasanikbacteria	1.39792e-05	0	0	0	0	0	0	0.000578449	0	0	0	0
470	Bacteria	Proteobacteria	Alphaproteobacteria	Rhizobiales	Rhizobiales_Incertae_Sedis	0	0.000271868	0	0.000174729	0	0	0	0.000578449	0	0	0	0
471	Bacteria	Proteobacteria	Gammaproteobacteria	Thiotrichales	Thiotrichaceae	0	0	0	0.00019969	0	0	0	0.000578449	0	0	0	0
472	Bacteria	Firmicutes	Bacilli	Bacillales	Bacillaceae	0	0	0	0	0	0.000934046	0	0.000578449	0	0	0	0
473	Bacteria	Acidobacteriota	Vicinamibacteria	Vicinamibacterales	uncultured	0	0	0	0	0	0	0	0.000570806	6.98788e-05	0	0	0
474	Bacteria	Gemmatimonadota	Gemmatimonadetes	Gemmatimonadales	Gemmatimonadaceae	0.000146781	0	0	0.00019969	0	0	0	0.000570806	0	0	0	0
475	Bacteria	Bacteroidota	Bacteroidia	Bacteroidales	Rikenellaceae	0	0	0	0	0	0	0	0.000570806	0	0	0	0
476	Bacteria	Proteobacteria	Alphaproteobacteria	Rickettsiales	SM2D12	0	0	0	0.000399381	0	0	0	0.000570806	0	0	0	0
477	Bacteria	Proteobacteria	Alphaproteobacteria	Rhodobacterales	Rhodobacteraceae	0.000382153	0	0.000574984	0	0.00368359	0	0	0.000564054	0.00113186	0	0	0
478	Bacteria	Desulfobacterota	Desulfobacteria	Desulfobacterales	Desulfobacteraceae	0	0.000135934	0	0	0	0	0	0.000564054	0	0	0	0
479	Bacteria	Bacteroidota	Bacteroidia	Sphingobacteriales	E6aC02	0	0	0	0.00019969	0	0	0	0.000562454	0.000116465	0	0	0
480	Bacteria	Proteobacteria	Gammaproteobacteria	Burkholderiales	Comamonadaceae	0.000217936	0	0	0	0	0	0	0.000557656	0	0	0	0
481	Bacteria	Firmicutes	Desulfitobacteriia	Desulfitobacteriales	Ambiguous_taxa	0	0.00028886	0.000314043	0	0	0	0	0.000550903	0	0	0	0
482	Bacteria	Bacteroidota	Bacteroidia	Flavobacteriales	Crocinitomicaceae	0.00308362	0	0	0	0	0	0	0.000550903	0.000852963	0	0.000485504	0
483	Bacteria	Planctomycetota	BD7-11	BD7-11	BD7-11	0	5.09753e-05	0	0	0	0	0	0.000550903	0.000228177	0	0	0
484	Bacteria	Elusimicrobiota	Endomicrobia	Endomicrobiales	Endomicrobiaceae	0	6.79671e-05	0	0	0	0	0	0.000550903	0.000136207	0	0	0
485	Bacteria	Acidobacteriota	Holophagae	Holophagales	Holophagaceae	0	0	0.000127102	0	0	0	0	0.000550903	5.82323e-05	0	0	0
486	Bacteria	Proteobacteria	Alphaproteobacteria	Sphingomonadales	Sphingomonadaceae	0.000153771	0	0.000114605	0.000673955	0.00135354	0.00399564	0.000936536	0.000550903	0	0	0	0
487	Bacteria	SAR324_clade(Marine_group_B)	SAR324_clade(Marine_group_B)	SAR324_clade(Marine_group_B)	SAR324_clade(Marine_group_B)	0	0	0	0	0	0	0	0.000550903	0	0	0	0
488	Bacteria	Proteobacteria	Gammaproteobacteria	Burkholderiales	Methylophilaceae	6.29063e-05	0	0	0	0	0	0	0.000550903	0	0	0	0
489	Bacteria	Firmicutes	Bacilli	Bacillales	Bacillaceae	0	0	0	0	0	0.000311349	0	0.000550903	0	0	0	0
490	Bacteria	Planctomycetota	Planctomycetes	Pirellulales	Pirellulaceae	0	0	0	0	0	0	0	0.00054486	0	0	0	0
491	Bacteria	Firmicutes	Bacilli	Alicyclobacillales	Alicyclobacillaceae	0	0	0	0	0	0.000570806	0	0.00054486	0	0	0	0
492	Bacteria	Verrucomicrobiota	Omnitrophia	Omnitrophales	Omnitrophaceae	0	0	0	7.48839e-05	0	0	0	0.00054486	0	0	0	0
493	Bacteria	Verrucomicrobiota	Verrucomicrobiae	Verrucomicrobiales	Verrucomicrobiaceae	0	0	3.52631e-05	0	0.000170498	0	0	0.00054486	0.000139758	0.001341	0	0.000499962
494	Bacteria	Myxococcota	Polyangia	Blfdi19	Blfdi19	0	0	0	0	0	0	0	0.00054486	0.000309668	0	0	0
495	Bacteria	Proteobacteria	Gammaproteobacteria	Acidiferrobacterales	Acidiferrobacteraceae	0	0	0	0	0	0	0	0.00054486	0	0	0	0
496	Bacteria	Deinococcota	Deinococci	Deinococcales	Deinococcaceae	8.17261e-05	0	0	0	0	0	0.000716175	0.00054486	0	0.000836937	0	0
497	Bacteria	Myxococcota	bacteriap25	bacteriap25	bacteriap25	0	0	0	0	0	0	0	0.00054486	0	0	0	0
498	Bacteria	Firmicutes	Clostridia	Oscillospirales	UCG-010	0	0	0	0	0	0	0	0.00054486	0	0	0	0
499	Bacteria	Myxococcota	Polyangia	Polyangiales	Sandaracinaceae	0.00016076	0	0	0	0.000219421	0	0	0.00054486	0	0	0	0
500	Bacteria	Planctomycetota	Pla3_lineage	Pla3_lineage	Pla3_lineage	0	8.49589e-05	0	0	0	0	0	0.00054486	0	0	0	0
501	Bacteria	Desulfobacterota	Desulfobacteria	Desulfobacterales	Desulfosarcinaceae	0	0.000271868	0	0	0	0	0	0.000542906	0.000628115	0	0.00383365	0.000192293
502	Bacteria	Proteobacteria	Gammaproteobacteria	JTB23	JTB23	0	0	0	0	6.58263e-05	0	0	0.000541307	5.82323e-05	0	0	0
503	Bacteria	Bdellovibrionota	Oligoflexia	0319-6G20	0319-6G20	0	0	5.34541e-05	0	0	0	0	0.000528511	0.000209636	0	0.000577981	0
504	Bacteria	Firmicutes	Bacilli	Bacillales	Bacillaceae	0	0	0	0	0	0	0.000605994	0.000523358	0.000630792	0	0	0.000801882
505	Bacteria	Spirochaetota	Leptospirae	Leptospirales	Leptospiraceae	0	0	0	0	0	0	0	0.000523358	0.000598521	0	0	0.00112263
506	Bacteria	Campilobacterota	Campylobacteria	Campylobacterales	Sulfurovaceae	0	0	0	0	0	0.000467023	0	0.000523358	0	0	0	0
507	Bacteria	Proteobacteria	Gammaproteobacteria	Burkholderiales	Sulfuricellaceae	0	0	0	0	0	0	0	0.000523358	0	0	9.2477e-05	0
508	Bacteria	Myxococcota	Polyangia	Polyangiales	BIrii41	0	0	6.68177e-05	0	0	0	0	0.000523358	0	0	0	0
509	Bacteria	Dependentiae	Babeliae	Babeliales	Babeliales	0	0	0	0	0.000322316	0	0	0.000523358	0	0.00188311	0	0
510	Bacteria	Verrucomicrobiota	Omnitrophia	Omnitrophales	Omnitrophales	7.16538e-05	0	0	0	0	0	0	0.000523358	0	0.00125541	0	0
511	Bacteria	Myxococcota	Polyangia	Polyangiales	Sandaracinaceae	0	0	0	0	0	0	0	0.000523358	0	0	0	0.000230751
512	Bacteria	Myxococcota	bacteriap25	bacteriap25	bacteriap25	0	0	5.28947e-05	0	0	0	0	0.000523358	0	0	0.00146914	0
513	Bacteria	Proteobacteria	Gammaproteobacteria	Burkholderiales	Gallionellaceae	0	0	0	0	0	0	0	0.000523358	0	0	0	0
514	Bacteria	Patescibacteria	Parcubacteria	Candidatus_Yonathbacteria	Candidatus_Yonathbacteria	0	0.000133387	0	0	0	0	0	0.000523358	0	0	0	0
515	Bacteria	Bacteroidota	Bacteroidia	Sphingobacteriales	env.OPS_17	0	0	5.34541e-05	7.48839e-05	0.000153595	0	0	0.000523358	0	0	0	0
516	Bacteria	Proteobacteria	Gammaproteobacteria	Methylococcales	Methylomonadaceae	0	0	0	0.00102341	0	0	0	0.000518914	0	0	0.000570776	0
517	Bacteria	Proteobacteria	Alphaproteobacteria	Caulobacterales	Hyphomonadaceae	0	0	0	0	0	0	0	0.000518914	0	0	0	0
518	Bacteria	Bdellovibrionota	Oligoflexia	Silvanigrellales	Silvanigrellaceae	0	0	0.000114605	0	0	0	0	0.000518914	0	0	0	0
519	Bacteria	Spirochaetota	Spirochaetia	Spirochaetales	Spirochaetaceae	0	0	0	7.48839e-05	0	0	0	0.000518914	0	0	0	0
520	Bacteria	Proteobacteria	Gammaproteobacteria	Legionellales	Legionellaceae	0	0	5.34541e-05	0	0	0	0	0.000518914	0	0	0	0
521	Bacteria	Proteobacteria	Alphaproteobacteria	Alphaproteobacteria	Alphaproteobacteria	0	0	0	0	0	0	0	0.000518914	0	0	0	0
522	Bacteria	Proteobacteria	Gammaproteobacteria	Burkholderiales	Methylophilaceae	0	0	0.000638373	0	0	0	0	0.000518914	0	0	0	0
523	Bacteria	Bacteroidota	Bacteroidia	Cytophagales	Spirosomaceae	0.000125813	0	0.000743804	0.000599071	0.00039557	0	0	0.000518914	0	0	0	0
524	Bacteria	Proteobacteria	Alphaproteobacteria	Rickettsiales	SM2D12	0	0	0	0	0	0	0	0.000518914	0	0	0	0
525	Bacteria	SAR324_clade(Marine_group_B)	SAR324_clade(Marine_group_B)	SAR324_clade(Marine_group_B)	SAR324_clade(Marine_group_B)	4.19375e-05	0	0.000217889	0	4.38842e-05	0	0	0.000518914	0	0	0	0
526	Bacteria	Verrucomicrobiota	Omnitrophia	Omnitrophales	Omnitrophaceae	0	0	0	0.000499226	0	0	0	0.000518914	0	0	0	0
527	Bacteria	Bacteroidota	Bacteroidia	Bacteroidales	Dysgonomonadaceae	0	0	0	0	0	0	0	0.000518914	0	0	0	0
528	Bacteria	Bdellovibrionota	Bdellovibrionia	Bdellovibrionales	Bdellovibrionaceae	0	0	0	0	0	0	0	0.000518914	0	0	0	0
529	Bacteria	Cyanobacteria	Sericytochromatia	Sericytochromatia	Sericytochromatia	0	0	0	0	0	0	0	0.000518914	0	0	0	0
530	Bacteria	Bdellovibrionota	Oligoflexia	0319-6G20	0319-6G20	0	0	4.67724e-05	0	0	0	0	0.000510563	0	0	0.000358032	0
531	Bacteria	Firmicutes	Clostridia	Lachnospirales	Lachnospiraceae	0	0	0	0.000249613	0	0	0	0.000507364	0.000146685	0.000418468	0.00196166	0.00038267
532	Bacteria	Proteobacteria	Gammaproteobacteria	Cellvibrionales	Cellvibrionaceae	0	0	2.64473e-05	0	0	0	0	0.000495813	0.000405905	0	0.00164382	0.000534588
533	Bacteria	Proteobacteria	Gammaproteobacteria	KI89A_clade	KI89A_clade	0.000153771	0	9.69735e-05	0	0	0	0	0.000495813	0.00148195	0	0	0
534	Bacteria	Myxococcota	Polyangia	Polyangiales	Sandaracinaceae	0	0	0.000127102	0	0	0	0	0.000495813	0	0	0.00062422	0
535	Bacteria	Planctomycetota	Planctomycetes	Gemmatales	Gemmataceae	0	0	0	0	0	0	0	0.000495813	0	0	0	0
536	Bacteria	Armatimonadota	Fimbriimonadia	Fimbriimonadales	Fimbriimonadales	0	0.000118942	0	0	0	0	0	0.000495813	0	0	0	0
537	Bacteria	Proteobacteria	Alphaproteobacteria	Rickettsiales	SM2D12	0	0	2.67271e-05	0	0	0	0	0.000495813	0	0	0	0
538	Bacteria	Patescibacteria	Parcubacteria	Parcubacteria	Parcubacteria	0	0	0	0	0	0	0	0.000495813	0	0	0	0
539	Bacteria	Bacteroidota	Bacteroidia	Cytophagales	Flammeovirgaceae	0	0	0	0	0	0	0	0.000495813	0	0	0	0
540	Bacteria	Proteobacteria	Gammaproteobacteria	Cellvibrionales	Cellvibrionaceae	0	0	0	0	0	0	0	0.000495813	0	0	0	0
541	Bacteria	Proteobacteria	Alphaproteobacteria	Sphingomonadales	Sphingomonadaceae	0	0	0	0	0	0.00674589	0.00302997	0.000492969	0.0010157	0	0	0
542	Bacteria	Bdellovibrionota	Bdellovibrionia	Bacteriovoracales	Bacteriovoracaceae	0	0	0	0	0	0	0	0.000492969	0.000683645	0	0	0
543	Bacteria	Bdellovibrionota	Oligoflexia	0319-6G20	0319-6G20	0	0	0	0	0.000427874	0	0	0.000492969	0.000228177	0	0	0
544	Bacteria	Planctomycetota	Planctomycetes	Gemmatales	Gemmataceae	0	0	0	0	0.000146507	0	0	0.000492969	0	0	0	0
545	Bacteria	Bacteroidota	Bacteroidia	Chitinophagales	Saprospiraceae	0	0	0	0	3.29131e-05	0	0	0.000492969	0	0	0	0
546	Bacteria	Verrucomicrobiota	Verrucomicrobiae	Opitutales	Opitutaceae	0	0	0.000363148	0.000449304	0	0	0	0.000492969	0	0	0	0
547	Bacteria	Bacteroidota	Bacteroidia	Chitinophagales	Chitinophagaceae	0	0	0	0	0.000468823	0	0	0.000492969	0	0	0	0
548	Bacteria	Patescibacteria	Parcubacteria	Candidatus_Nomurabacteria	Candidatus_Nomurabacteria	0	0	0	0	2.93015e-05	0	0	0.000492969	0	0	0	0
549	Archaea	Crenarchaeota	Nitrososphaeria	Marine_Benthic_Group_A	Marine_Benthic_Group_A	0	0	0	0.000474265	0	0	0	0.000484617	0	0	0	0
550	Bacteria	Verrucomicrobiota	Verrucomicrobiae	Opitutales	Opitutaceae	0	0	3.34088e-05	0	0	0	0	0.000479819	0.000477505	0	0	0
551	Bacteria	Proteobacteria	Alphaproteobacteria	Rhizobiales	Amb-16S-1323	0	0	0	0	0	0	0	0.000468268	0	0	0.000317098	0
552	Archaea	Nanoarchaeota	Nanoarchaeia	Woesearchaeales	Woesearchaeales	1.39792e-05	0	0	0	0	0	0	0.000468268	0	0	0	0.000615337
553	Bacteria	Proteobacteria	Alphaproteobacteria	Rickettsiales	SM1B06	0	0	0	0	0.00010971	0	0	0.000468268	0.000174697	0	0	0
554	Bacteria	Spirochaetota	MVP-15	MVP-15	MVP-15	0	0	5.34541e-05	0	0	0	0	0.000468268	0	0	0.00127156	0
555	Bacteria	Patescibacteria	Saccharimonadia	Saccharimonadales	Saccharimonadales	1.39792e-05	0	0	0	0	0	0	0.000468268	0	0	0.00107813	0
556	Bacteria	Bacteroidota	Bacteroidia	Flavobacteriales	Flavobacteriaceae	0	0	0	0	0	0	0	0.000468268	0	0	0	0
557	Bacteria	Proteobacteria	Gammaproteobacteria	Burkholderiales	Rhodocyclaceae	0	0	0	0	0	0	0.000275452	0.000468268	0	0	0	0
558	Bacteria	Planctomycetota	Brocadiae	Brocadiales	Brocadiaceae	0	0	2.67271e-05	0	0	0	0	0.000468268	0	0	0	0
559	Bacteria	Proteobacteria	Alphaproteobacteria	Rickettsiales	SM2D12	0	0	7.05262e-05	0	0	0	0	0.000468268	0	0	0	0
560	Bacteria	Actinobacteriota	Coriobacteriia	CG2-30-50-142	CG2-30-50-142	0	0	0	0	0	0	0	0.000468268	0	0	0	0
561	Bacteria	Proteobacteria	Gammaproteobacteria	Cellvibrionales	Cellvibrionaceae	0	0	0	0	0	0	0	0.000468268	0	0	0	0
562	Bacteria	Bdellovibrionota	Oligoflexia	0319-6G20	0319-6G20	0	0	0	0.00019969	0	0	0	0.000468268	0	0	0	0
563	Bacteria	Bacteroidota	Bacteroidia	Cytophagales	Spirosomaceae	0	0	0	0	0.000394958	0.00108972	0	0.000468268	0	0	0	0
564	Bacteria	Chloroflexi	Dehalococcoidia	SAR202_clade	SAR202_clade	0	0	0	0	0	0	0	0.000467023	0	0	0	0
565	Bacteria	Planctomycetota	Planctomycetes	Pirellulales	Pirellulaceae	0	0.000237885	0	0	0	0	0	0.000467023	0	0	0	0
566	Bacteria	Proteobacteria	Gammaproteobacteria	Acidiferrobacterales	Acidiferrobacteraceae	0	0	0	0.000399381	0	0	0	0.000467023	0	0	0	0
567	Bacteria	Proteobacteria	Gammaproteobacteria	Burkholderiales	Comamonadaceae	0	0	0	0	0	0	0	0.000467023	0	0	0	0
568	Bacteria	Verrucomicrobiota	Verrucomicrobiae	Verrucomicrobiales	Rubritaleaceae	0	0	0.000126114	0	0	0	0	0.000467023	0.000104818	0	0	0
569	Bacteria	Dependentiae	Babeliae	Babeliales	Babeliales	0	0	0	0	0	0	0	0.000467023	0	0	0.0006011	0
570	Bacteria	Proteobacteria	Gammaproteobacteria	Xanthomonadales	Rhodanobacteraceae	0	0	6.17104e-05	0	0	0	0	0.000467023	0	0	0	0
571	Bacteria	Proteobacteria	Gammaproteobacteria	Burkholderiales	Rhodocyclaceae	0	0	0	0.00114822	0	0	0	0.000467023	0	0	0	0
572	Bacteria	Campilobacterota	Campylobacteria	Campylobacterales	Sulfurimonadaceae	0	0	0	0	0	0	0	0.000467023	0	0	0	0
573	Bacteria	Bdellovibrionota	Oligoflexia	Silvanigrellales	Silvanigrellaceae	4.89271e-05	0	6.01359e-05	0	0	0	0	0.000467023	0	0	0	0
574	Bacteria	Verrucomicrobiota	Omnitrophia	Omnitrophales	Omnitrophaceae	0	0	0	0	0	0	0	0.000467023	0	0	0	0
575	Bacteria	Patescibacteria	Microgenomatia	Microgenomatia	Microgenomatia	0	0	0	0	0	0	0	0.000467023	0	0	0	0
576	Bacteria	Verrucomicrobiota	Verrucomicrobiae	Pedosphaerales	Pedosphaeraceae	0	0	4.67724e-05	0	0	0	0	0.000467023	0	0	0	0
577	Bacteria	Verrucomicrobiota	Verrucomicrobiae	Pedosphaerales	Pedosphaeraceae	9.08646e-05	0	0	0	0	0	0	0.000467023	0	0	0	0
578	Bacteria	Bdellovibrionota	Bdellovibrionia	Bacteriovoracales	Bacteriovoracaceae	0	0	0	0	0	0	0	0.000467023	0	0	0	0
579	Bacteria	Fermentibacterota	Fermentibacteria	Fermentibacterales	Fermentibacteraceae	0	0	0	0.000149768	0	0	0	0.000460271	0	0	0	0
580	Bacteria	Actinobacteriota	Thermoleophilia	Gaiellales	Gaiellaceae	0	0	0	0	0	0	0	0.000457072	0	0	0	0
581	Bacteria	Bacteroidota	Bacteroidia	Flavobacteriales	Flavobacteriaceae	0	0	0	0	0	0	0	0.000447475	0	0	0	0
582	Bacteria	Bacteroidota	Bacteroidia	Sphingobacteriales	env.OPS_17	0	0.000933707	0	0.00104838	8.77684e-05	0	0.00137726	0.000447475	0	0	0	0
583	Bacteria	Bacteroidota	Bacteroidia	Flavobacteriales	Flavobacteriaceae	0	0	0	0.000274574	0	0	0	0.000441077	0	0	0	0
584	Archaea	Nanoarchaeota	Nanoarchaeia	Woesearchaeales	Woesearchaeales	0	0	0	0	0	0	0	0.000441077	0	0	0	0
585	Bacteria	Proteobacteria	Gammaproteobacteria	Burkholderiales	Comamonadaceae	0	0	0	0	0	0	0	0.000441077	0.00187273	0	0.00237748	0
586	Bacteria	Proteobacteria	Gammaproteobacteria	Burkholderiales	Rhodocyclaceae	0	0	0	0	0	0	0	0.000441077	0	0	0.000336304	0
587	Bacteria	Desulfobacterota	Desulfobacteria	Desulfobacterales	uncultured	0	0	0	0	0	0	0	0.000441077	0.000267869	0	0	0
588	Archaea	Crenarchaeota	Nitrososphaeria	Nitrosopumilales	Nitrosopumilaceae	0	0.00047577	0	0	0	0	0	0.000441077	0	0	0	0
589	Bacteria	Planctomycetota	Brocadiae	Brocadiales	Scalinduaceae	0	0	0	0.000174729	0	0	0	0.000441077	0	0	0	0
590	Bacteria	Myxococcota	Polyangia	mle1-27	mle1-27	0	0	0	0	0	0	0	0.000441077	0	0	0	0
591	Bacteria	Bacteroidota	Bacteroidia	Chitinophagales	Chitinophagaceae	0	0	0	0	0	0	0	0.000441077	0	0	0	0
592	Bacteria	Bacteroidota	Bacteroidia	Sphingobacteriales	env.OPS_17	0	0	5.34541e-05	0	0.000102555	0	0	0.000441077	0	0	0	0
593	Bacteria	Bdellovibrionota	Bdellovibrionia	Bdellovibrionales	Bdellovibrionaceae	0	0	5.34541e-05	0	0	0	0	0.000441077	0	0	0	0
594	Bacteria	Patescibacteria	Microgenomatia	Candidatus_Woesebacteria	Candidatus_Woesebacteria	0	0	0	0	0	0	0	0.000441077	0	0	0	0
595	Archaea	Crenarchaeota	Bathyarchaeia	Bathyarchaeia	Bathyarchaeia	0	0	0	0.000449304	0	0	0	0.000440723	0	0	0	0
596	Bacteria	Acidobacteriota	Holophagae	Subgroup_7	Subgroup_7	0	0	0	0	8.77684e-05	0	0	0.000440723	0.00141581	0	0	0
597	Bacteria	Proteobacteria	Gammaproteobacteria	Burkholderiales	Comamonadaceae	0.000125813	0	0.000472092	0.000823723	0.000186508	0	0	0.000440723	0	0	0.000809912	0.000908799
598	Bacteria	Proteobacteria	Gammaproteobacteria	Enterobacterales	Ambiguous_taxa	0	0	0	0	0	0	0	0.000440723	0	0	0	0
599	Bacteria	Proteobacteria	Alphaproteobacteria	Rhizobiales	Rhizobiales_Incertae_Sedis	0	0	0.000285358	0	0.000700158	0.00202377	0.00198325	0.000440723	0.000462367	0	0.00042038	0
600	Bacteria	Bacteroidota	Bacteroidia	SM1A07	SM1A07	0	0	3.52631e-05	0	0	0	0	0.000440723	0	0.00487012	0	0
601	Bacteria	Bdellovibrionota	Bdellovibrionia	Bacteriovoracales	Bacteriovoracaceae	0	0	8.01812e-05	0	0	0	0	0.000440723	0	0.00252666	0	0
602	Bacteria	Bacteroidota	Bacteroidia	Flavobacteriales	Flavobacteriaceae	0	0	0.000133635	0	0	0	0	0.000440723	5.82323e-05	0.00245691	0	0
603	Bacteria	Proteobacteria	Alphaproteobacteria	Rhizobiales	Xanthobacteraceae	0	0	0	0	0	0	0	0.000440723	0	0.00132515	0	0
604	Bacteria	Bacteroidota	Bacteroidia	Chitinophagales	uncultured	6.29063e-05	0	0.000181574	0.000174729	0.00010971	0	0	0.000440723	0	0.000984804	0	0
605	Bacteria	Bdellovibrionota	Oligoflexia	0319-6G20	0319-6G20	0	0	0	0	0	0	0	0.000440723	0.000470177	0	0	0
606	Bacteria	Proteobacteria	Alphaproteobacteria	Rickettsiales	Mitochondria	0	0	0.00130291	0	0	0	0	0.000440723	0	0	0.000277431	0
607	Bacteria	Bdellovibrionota	Bdellovibrionia	Bdellovibrionales	Bdellovibrionaceae	0	0	4.40789e-05	0	0	0	0	0.000440723	0	0	0	0
608	Bacteria	Proteobacteria	Alphaproteobacteria	Rhodospirillales	uncultured	0	0	0.000108944	0	0	0	0	0.000440723	0	0	0	0
609	Bacteria	Proteobacteria	Gammaproteobacteria	Beggiatoales	Beggiatoaceae	0.000405396	0	0.000514071	0.000274574	0.000757002	0	0.00126708	0.000440723	0	0	0	0
610	Archaea	Nanoarchaeota	Nanoarchaeia	Woesearchaeales	GW2011	0	0	0	0	0	0	0	0.000440723	0	0	0	0
611	Bacteria	Proteobacteria	Gammaproteobacteria	Burkholderiales	Comamonadaceae	0	0	0	0	0.000263713	0.00217944	0	0.000432726	0.00165428	0	0.00164884	0.000641505
612	Archaea	Nanoarchaeota	Nanoarchaeia	Woesearchaeales	Woesearchaeales	0	0	0	0.000324497	0	0	0	0.000426328	0	0	0.000252228	0
613	Bacteria	Patescibacteria	Gracilibacteria	Gracilibacteria	Gracilibacteria	0	0	0	0	0	0	0	0.00041993	6.98788e-05	0	0	0
614	Bacteria	Bacteroidota	Bacteroidia	Flavobacteriales	Crocinitomicaceae	0.0521662	0.00337056	0.000446176	0.000124807	0.000468823	0	0	0.000415132	0.000114088	0.000209234	0	0
615	Bacteria	Proteobacteria	Gammaproteobacteria	Burkholderiales	Hydrogenophilaceae	0	0	0	0	0.000135144	0	0	0.000415132	0.000561801	0	0.00160722	0
616	Bacteria	Bacteroidota	Bacteroidia	Chitinophagales	Saprospiraceae	0	0	0.000123421	0.000274574	0	0	0	0.000415132	0.000433142	0	0	0.000267294
617	Bacteria	Bdellovibrionota	Oligoflexia	Oligoflexales	uncultured	0.000132802	0	0	0	0	0	0	0.000415132	0	0	0	0
618	Bacteria	Bacteroidota	Bacteroidia	Bacteroidales	Williamwhitmaniaceae	0	0	0	0	0	0	0	0.000415132	0	0	0	0
619	Bacteria	Proteobacteria	Alphaproteobacteria	Rhizobiales	Rhizobiales_Incertae_Sedis	0	0.000254877	0	0	0	0	0	0.000415132	0	0	0	0
620	Bacteria	Proteobacteria	Alphaproteobacteria	Micavibrionales	uncultured	0	0	0.000387894	0.000224652	0	0	0	0.000415132	0	0	0	0
621	Archaea	Nanoarchaeota	Nanoarchaeia	Woesearchaeales	Woesearchaeales	2.79583e-05	0	0	0	0	0	0	0.000415132	0	0	0	0
622	Bacteria	Firmicutes	Clostridia	Oscillospirales	Ruminococcaceae	0	0	0	0	0	0	0	0.000415132	0	0	0	0
623	Bacteria	Acidobacteriota	Thermoanaerobaculia	Thermoanaerobaculales	Thermoanaerobaculaceae	0.000143308	0	0	0	0	0.000570806	0	0.000413178	0.00183414	0	0.00345447	0
624	Bacteria	Bacteroidota	Bacteroidia	Sphingobacteriales	env.OPS_17	0	0	9.35447e-05	0	0	0	0	0.000413178	0	0	0	0
625	Bacteria	Calditrichota	Calditrichia	Calditrichales	Calditrichaceae	0	0	0	7.48839e-05	0	0	0	0.000413178	0	0	0	0
626	Bacteria	Campilobacterota	Campylobacteria	Campylobacterales	Arcobacteraceae	0.000517598	0	0	0	0	0	0	0.000413178	0	0	0	0
627	Bacteria	Planctomycetota	Planctomycetes	Isosphaerales	Isosphaeraceae	1.39792e-05	0	0	0	0	0	0	0.000413178	0	0.00540113	0	0.000192293
628	Bacteria	Bacteroidota	Bacteroidia	Sphingobacteriales	NS11-12_marine_group	0	0	3.34088e-05	0	0	0	0	0.000413178	0.000271299	0	0	0
629	Bacteria	Bacteroidota	Bacteroidia	Sphingobacteriales	env.OPS_17	0	0	0	0.000249613	0	0	0	0.000413178	0	0	0	0
630	Bacteria	Patescibacteria	Parcubacteria	Candidatus_Jorgensenbacteria	Candidatus_Jorgensenbacteria	0	0	2.64473e-05	0	0	0	0	0.000413178	0	0	0	0
631	Archaea	Nanoarchaeota	Nanoarchaeia	Woesearchaeales	GW2011	0	0	0	0	0	0	0	0.000413178	0	0	0	0
632	Bacteria	Myxococcota	Polyangia	Haliangiales	Haliangiaceae	0	0	7.26296e-05	0	3.29131e-05	0	0	0.000413178	0	0	0	0
633	Bacteria	Proteobacteria	Gammaproteobacteria	Burkholderiales	Oxalobacteraceae	0	0	0	0.000499226	0	0	0	0.000413178	0	0	0	0
634	Bacteria	Planctomycetota	Planctomycetes	Gemmatales	Gemmataceae	0	0	2.00453e-05	0	0	0	0	0.000413178	0	0	0	0
635	Bacteria	Bacteroidota	Bacteroidia	Flavobacteriales	Flavobacteriaceae	3.49479e-05	0	3.34088e-05	0	0	0	0	0.000413178	0	0	0	0
636	Bacteria	Bacteroidota	Bacteroidia	Bacteroidales	Marinilabiliaceae	0	0	0	0	0	0	0	0.000413178	0	0	0	0
637	Bacteria	Elusimicrobiota	Elusimicrobia	Lineage_IV	Lineage_IV	0	0	0	0	0	0	0	0.000413178	0	0	0	0
638	Bacteria	Proteobacteria	Gammaproteobacteria	Burkholderiales	Comamonadaceae	0	0	0	0.000224652	0	0	0	0.000413178	0	0	0	0
639	Bacteria	Proteobacteria	Alphaproteobacteria	Rickettsiales	Mitochondria	0	0	0	0	5.83465e-05	0	0	0.000413178	0	0	0	0
640	Bacteria	Proteobacteria	Gammaproteobacteria	Burkholderiales	Oxalobacteraceae	0	0	0	0.000424342	0	0	0	0.000413178	0	0	0	0
641	Bacteria	Dependentiae	Babeliae	Babeliales	UBA12409	0	0	3.34088e-05	0	0	0	0	0.000413178	0	0	0	0
642	Bacteria	Bacteroidota	Bacteroidia	Chitinophagales	Saprospiraceae	0.000181729	0	0	0	0.000384395	0.00140107	0.0017078	0.000408379	0	0	0	0
643	Bacteria	Bacteroidota	Bacteroidia	Sphingobacteriales	NS11-12_marine_group	0	0	0	0	0.000102555	0	0	0.000400382	0.000241913	0	0.00142492	0.000752255
644	Bacteria	Nitrospirota	BMS9AB35	BMS9AB35	BMS9AB35	0	0	3.34088e-05	0	0	0	0	0.000398783	0.00115322	0	0	0
645	Bacteria	Verrucomicrobiota	Omnitrophia	Omnitrophales	Omnitrophaceae	0	0	4.00906e-05	0	0	0	0	0.000395584	0	0	0	0
646	Bacteria	Patescibacteria	Gracilibacteria	JGI_0000069-P22	JGI_0000069-P22	0	0	0.000106908	0	0	0	0	0.000393984	0.000314454	0	0	0
647	Bacteria	Proteobacteria	Gammaproteobacteria	Burkholderiales	Alcaligenaceae	0	0	0	0	0	0	0	0.000389186	0.00115593	0	0	0
648	Bacteria	Myxococcota	Polyangia	Blfdi19	Blfdi19	0	0	0	0	0	0	0	0.000389186	0	0	0	0
649	Bacteria	Myxococcota	Polyangia	Polyangiales	Sandaracinaceae	0.000111833	0	0.000523409	0	0	0	0	0.000389186	0	0	0	0
650	Bacteria	Patescibacteria	Gracilibacteria	Candidatus_Peregrinibacteria	Candidatus_Peregrinibacteria	0	0	0	0	0.000243751	0	0	0.000389186	0	0	0	0
651	Bacteria	Proteobacteria	Alphaproteobacteria	Rickettsiales	Rickettsiaceae	0	0	0	0	0	0	0	0.000389186	0	0	0	0
652	Bacteria	Proteobacteria	Alphaproteobacteria	Rickettsiales	Mitochondria	0	0	0	0	0	0	0	0.000389186	0	0	0	0
653	Bacteria	Bacteroidota	Bacteroidia	Bacteroidales	Marinilabiliaceae	0	0.000220893	0	0	0	0	0	0.000385632	0.000268922	0	0	0
654	Bacteria	Myxococcota	Polyangia	Polyangiales	Sandaracinaceae	0.00026273	0	0	0	0	0	0	0.000385632	0.000521482	0	0	0
655	Bacteria	Proteobacteria	Alphaproteobacteria	Rickettsiales	Mitochondria	0	0	0.000110617	0	0	0	0	0.000385632	0.000418439	0	0.00050799	0
656	Bacteria	Bacteroidota	Bacteroidia	Cytophagales	Microscillaceae	0	0	0.000653666	0	0	0	0	0.000385632	0	0	0	0
657	Bacteria	Proteobacteria	Gammaproteobacteria	Burkholderiales	Nitrosomonadaceae	0	0	0	0.00019969	0	0	0	0.000385632	0.000228758	0.0553063	0	0
658	Bacteria	Cyanobacteria	Sericytochromatia	Sericytochromatia	Sericytochromatia	0	0	0	0	0	0	0	0.000385632	0	0	0	0.00160376
659	Bacteria	Bacteroidota	Bacteroidia	Chitinophagales	uncultured	1.39792e-05	0	6.17104e-05	0	0	0	0	0.000385632	0	0	0	0
660	Bacteria	Verrucomicrobiota	Chlamydiae	Chlamydiales	Parachlamydiaceae	0	0	0	0	0	0	0	0.000385632	0	0	0	0
661	Bacteria	Cyanobacteria	Cyanobacteriia	Chloroplast	Chloroplast	4.19375e-05	0	0	0	0	0	0	0.000385632	0	0	0	0
662	Bacteria	Proteobacteria	Gammaproteobacteria	Burkholderiales	Comamonadaceae	0	0	0.000140317	0	0.000468823	0	0	0.000385632	0	0	0	0
663	Bacteria	Bdellovibrionota	Oligoflexia	Silvanigrellales	Silvanigrellaceae	0	0	0	0	0	0	0	0.000385632	0	0	0	0
664	Bacteria	Proteobacteria	Gammaproteobacteria	Acidiferrobacterales	Acidiferrobacteraceae	0	0	0	0	0.000102555	0	0	0.000385632	0	0	0	0
665	Bacteria	Bdellovibrionota	Bdellovibrionia	Bacteriovoracales	Bacteriovoracaceae	0	0	0	0	0	0	0	0.000379235	0.000170259	0	0	0
666	Bacteria	Proteobacteria	Alphaproteobacteria	Caulobacterales	Caulobacteraceae	0	0	0	0.000224652	0	0	0	0.000376036	0	0	0	0
667	Bacteria	Bacteroidota	Bacteroidia	Cytophagales	Cyclobacteriaceae	0	0.000254877	0	0	0	0	0	0.000374436	0.00504562	0	0.00184967	0.000267294
668	Bacteria	Proteobacteria	Gammaproteobacteria	Burkholderiales	Methylophilaceae	9.78542e-05	0	0	0	0	0	0	0.00036324	0.000627134	0	0	0
669	Bacteria	Dependentiae	Babeliae	Babeliales	Babeliales	0	0	0	0.000449304	0	0	0	0.00036324	0	0	0	0
670	Bacteria	Bdellovibrionota	Bdellovibrionia	Bacteriovoracales	Bacteriovoracaceae	0	0	0	0	0	0	0	0.00036324	0.000130387	0	0	0
671	Bacteria	Acidobacteriota	Blastocatellia	Blastocatellales	Blastocatellaceae	0	0	9.35447e-05	0	0	0	0	0.00036324	0.000580602	0.000557958	0	0
672	Bacteria	Proteobacteria	Gammaproteobacteria	Burkholderiales	Comamonadaceae	0	0	0.000562879	0	0	0	0	0.00036324	0.000419273	0	0	0
673	Bacteria	Bacteroidota	Bacteroidia	Bacteroidales	Rikenellaceae	5.59167e-05	0	0	0	0	0	0	0.00036324	0.000602747	0	0	0
674	Bacteria	Bdellovibrionota	Bdellovibrionia	Bacteriovoracales	Bacteriovoracaceae	0	0	0	0	2.93015e-05	0	0	0.00036324	0.000408622	0	9.2477e-05	0
675	Bacteria	Proteobacteria	Alphaproteobacteria	Rickettsiales	Rickettsiales	0	0	6.01359e-05	0	0	0	0	0.00036324	0	0	0.000277431	0
676	Bacteria	Proteobacteria	Alphaproteobacteria	Rhizobiales	Rhizobiales_Incertae_Sedis	0	0	2.64473e-05	0.000149768	0	0	0	0.00036324	0	0	0	0
677	Bacteria	Proteobacteria	Alphaproteobacteria	Rickettsiales	SM2D12	0	0	2.64473e-05	0	0	0	0	0.00036324	0	0	0	0
678	Bacteria	Proteobacteria	Alphaproteobacteria	Kordiimonadales	Kordiimonadaceae	0	0	6.01359e-05	0	0	0	0	0.00036324	0	0	0	0
679	Bacteria	Actinobacteriota	Acidimicrobiia	uncultured	uncultured	4.89271e-05	0	0	0	0	0	0	0.00036324	0	0	0	0
680	Bacteria	Cyanobacteria	Vampirivibrionia	Vampirovibrionales	Vampirovibrionales	0	0	0	0	0	0	0	0.00036324	0	0	0	0
681	Bacteria	Nitrospirota	Thermodesulfovibrionia	uncultured	uncultured	9.08646e-05	0.000366813	0	0	0	0	0	0.00036324	0	0	0	0
682	Bacteria	Bacteroidota	Bacteroidia	SM1A07	SM1A07	0	0	7.34994e-05	0	0	0	0	0.00036324	0	0	0	0
683	Bacteria	Proteobacteria	Gammaproteobacteria	Burkholderiales	Neisseriaceae	0	0	0	0	0	0	0	0.00036324	0	0	0	0
684	Bacteria	Desulfobacterota	Desulfobacteria	Desulfobacterales	Desulfosarcinaceae	0	0	0	0	0	0	0	0.00036324	0	0	0	0
685	Bacteria	Verrucomicrobiota	Omnitrophia	Omnitrophales	Omnitrophaceae	0	0	0	0	0	0	0	0.00036324	0	0	0	0
686	Bacteria	Proteobacteria	Gammaproteobacteria	Burkholderiales	Comamonadaceae	0	0	0	0	0	0	0	0.000358087	0.000310017	0	0.0012809	0.000692254
687	Bacteria	Cyanobacteria	Cyanobacteriia	Chloroplast	Chloroplast	0	6.79671e-05	0	0	0	0	0	0.000358087	0.000668861	0	0	0
688	Bacteria	Proteobacteria	Gammaproteobacteria	B2M28	B2M28	0	0.000441786	0	0	0	0	0	0.000358087	0	0	0	0
689	Bacteria	Verrucomicrobiota	Verrucomicrobiae	Verrucomicrobiales	Rubritaleaceae	0	0	0.000311805	0	0	0	0	0.000358087	0	0	0.000184954	0
690	Bacteria	Proteobacteria	Alphaproteobacteria	SAR11_clade	Clade_IV	0	0	0	0	0	0	0	0.000358087	0.000114088	0.00132515	0	0
691	Bacteria	Dependentiae	Babeliae	Babeliales	UBA12411	0	0	0	0	0.000136142	0	0	0.000358087	0	0	0	0
692	Bacteria	Bacteroidota	Bacteroidia	Sphingobacteriales	env.OPS_17	0	0	0	0	0	0	0	0.000358087	0	0	0	0.000692254
693	Bacteria	Firmicutes	Bacilli	Bacillales	Bacillaceae	0	0	0	0	0.00221717	0	0	0.000358087	0	0.00172414	0	0
694	Bacteria	Proteobacteria	Alphaproteobacteria	Paracaedibacterales	Paracaedibacteraceae	0	0	0	0	0	0	0	0.000358087	0	0	0	0.000694964
695	Bacteria	Cyanobacteria	Vampirivibrionia	Caenarcaniphilales	Caenarcaniphilales	0	0	8.01812e-05	0	0	0	0	0.000358087	0.000563576	0	0	0
696	Bacteria	Patescibacteria	Parcubacteria	Candidatus_Ryanbacteria	Candidatus_Ryanbacteria	0	0	7.9342e-05	0.000299536	0	0	0	0.000358087	0	0	0	0
697	Bacteria	Elusimicrobiota	Lineage_IIb	Lineage_IIb	Lineage_IIb	0	0	0	0	0	0	0	0.000358087	0	0	0	0
698	Bacteria	Proteobacteria	Gammaproteobacteria	Burkholderiales	Nitrosomonadaceae	0.00016076	0	0.000193947	0	0	0	0	0.000358087	0	0	0	0
699	Bacteria	Bdellovibrionota	Oligoflexia	Oligoflexales	uncultured	0	0	4.67724e-05	0	0	0	0	0.000358087	0	0	0	0
700	Bacteria	Bacteroidota	Kapabacteria	Kapabacteriales	Kapabacteriales	0	0	0	0	0	0	0	0.000358087	0	0	0	0
701	Bacteria	Campilobacterota	Campylobacteria	Campylobacterales	Arcobacteraceae	0	0	2.00453e-05	0	0	0	0	0.000358087	0	0	0	0
702	Bacteria	SAR324_clade(Marine_group_B)	SAR324_clade(Marine_group_B)	SAR324_clade(Marine_group_B)	SAR324_clade(Marine_group_B)	0	0	0	0	0	0	0	0.000358087	0	0	0	0
703	Bacteria	Bacteroidota	Bacteroidia	Sphingobacteriales	env.OPS_17	0	0	0	0	0	0.000882155	0	0.000358087	0	0	0	0
704	Bacteria	Proteobacteria	Gammaproteobacteria	Halothiobacillales	Halothiobacillaceae	0	0	0.000290518	0	0	0	0	0.000358087	0	0	0	0
705	Bacteria	Proteobacteria	Gammaproteobacteria	Burkholderiales	Leeiaceae	0	0	0	0	0	0	0	0.000358087	0	0	0	0
706	Bacteria	Aquificota	Aquificae	Aquificales	Aquificaceae	0	0	0	0	0	0	0	0.000358087	0	0	0	0
707	Bacteria	Proteobacteria	Gammaproteobacteria	Burkholderiales	Comamonadaceae	0	0	0	0.00384404	0	0	0	0.000358087	0	0	0	0
708	Bacteria	Myxococcota	Polyangia	Polyangiales	Polyangiaceae	0	0	0	0	0	0	0.000716175	0.000358087	0	0	0	0
709	Bacteria	Bacteroidota	Bacteroidia	Cytophagales	Spirosomaceae	0	0	0.000464647	0	0.00123667	0	0	0.000353289	0	0.000287356	0.000428781	0
710	Bacteria	Actinobacteriota	Thermoleophilia	Solirubrobacterales	67-14	0	0	0	0	0	0.00166053	0	0.000351689	0	0	0	0
711	Bacteria	Actinobacteriota	Actinobacteria	Streptomycetales	Streptomycetaceae	0	0.000169918	0	0	0	0	0	0.000337294	0.000717697	0	0	0
712	Bacteria	Bacteroidota	Bacteroidia	Flavobacteriales	Crocinitomicaceae	0	0.000366813	0	0	0	0	0	0.000337294	0	0	0	0
713	Archaea	Nanoarchaeota	Nanoarchaeia	Woesearchaeales	SCGC_AAA011-D5	0	0	0	7.48839e-05	0	0	0	0.000337294	0	0.000478927	0	0
714	Bacteria	Myxococcota	Myxococcia	Myxococcales	Myxococcaceae	0	0	0	0	0	0	0	0.000337294	0	0	0	0
715	Bacteria	Proteobacteria	Alphaproteobacteria	Rhodobacterales	Rhodobacteraceae	0	0	0	0.000349458	0	0	0	0.000337294	0	0	0	0
716	Bacteria	Firmicutes	Bacilli	Paenibacillales	Paenibacillaceae	0	0	8.01812e-05	0	0	0	0	0.000337294	0.000267869	0.00153257	0	0
717	Bacteria	Acidobacteriota	Aminicenantia	Aminicenantales	Aminicenantales	0	0	0	7.48839e-05	0	0	0	0.000337294	0.000699729	0	0	0
718	Bacteria	Firmicutes	Clostridia	Clostridia	Hungateiclostridiaceae	0	0	0.000541295	0	0	0	0	0.000337294	0.000267869	0	0	0
719	Bacteria	Verrucomicrobiota	Chlamydiae	Chlamydiales	Parachlamydiaceae	0	0	7.9342e-05	0	0	0	0	0.000337294	0.000179282	0	0	0
720	Bacteria	Dependentiae	Babeliae	Babeliales	UBA12409	0	0	8.6863e-05	0	0	0	0	0.000337294	0	0	0	0
721	Bacteria	Firmicutes	Clostridia	Christensenellales	Christensenellaceae	0	6.66933e-05	0	0	0	0	0	0.000337294	0	0	0	0
722	Bacteria	Patescibacteria	Gracilibacteria	Gracilibacteria	Gracilibacteria	0	0	0	0	0.000186508	0	0.000661084	0.000337294	0	0	0	0
723	Bacteria	Verrucomicrobiota	Omnitrophia	Omnitrophales	Omnitrophales	0	0	0	0	2.93015e-05	0	0	0.000337294	0	0	0	0
724	Bacteria	Campilobacterota	Campylobacteria	Campylobacterales	uncultured	0	0	0	0	0	0	0	0.000337294	0	0	0	0
725	Bacteria	Firmicutes	Clostridia	Clostridiales	Clostridiaceae	0	0	0.000153681	0	0	0	0	0.000337294	0	0	0	0
726	Bacteria	Firmicutes	Clostridia	Clostridia	Gracilibacteraceae	0	0.000152926	0	0	0	0	0	0.000337294	0	0	0	0
727	Bacteria	Bacteroidota	Bacteroidia	Chitinophagales	Chitinophagaceae	0	0	0.00036414	0	0	0	0	0.000337294	0	0	0	0
728	Bacteria	Proteobacteria	Gammaproteobacteria	Pseudomonadales	Moraxellaceae	0	0	0	0.000124807	0	0	0	0.000337294	0	0	0	0
729	Bacteria	Actinobacteriota	Actinobacteria	Micrococcales	Microbacteriaceae	0	0	0.00211039	0.00209675	0.000792888	0.0011935	0	0.000337294	0	0	0	0
730	Bacteria	Chloroflexi	Chloroflexia	Chloroflexales	Roseiflexaceae	0	0	0	0	0	0	0	0.000330542	0.00443581	0.00376622	0.000568757	0.000374211
731	Bacteria	Campilobacterota	Campylobacteria	Campylobacterales	Sulfurovaceae	0.00034249	0.00548687	0	0.0019969	0	0	0.000385632	0.000330542	0.00380749	0.00362673	0.000323669	0
732	Bacteria	Proteobacteria	Gammaproteobacteria	Beggiatoales	Beggiatoaceae	0	0	0	0	0	0	0	0.000330542	0.000912282	0	0.0018081	0.00631197
733	Bacteria	Bacteroidota	Bacteroidia	Chitinophagales	Chitinophagaceae	0	0.00020008	0	0	0	0	0	0.000330542	0.000358563	0	0	0
734	Bacteria	Bacteroidota	Bacteroidia	Bacteroidales	Dysgonomonadaceae	0	0	4.00906e-05	0	5.83465e-05	0	0	0.000330542	0	0	0	0
735	Bacteria	Cyanobacteria	Cyanobacteriia	Chloroplast	Chloroplast	0	0	0	0	0	0	0	0.000330542	0	0	0	0
736	Bacteria	Proteobacteria	Alphaproteobacteria	Rhizobiales	Labraceae	0	0	0	0.000274574	0.000329131	0.000830263	0.0017078	0.000330542	0	0	0	0
737	Bacteria	Proteobacteria	Alphaproteobacteria	Rickettsiales	SM2D12	0	0	0	0	0	0	0	0.000330542	0	0	0	0
738	Bacteria	Proteobacteria	Gammaproteobacteria	Xanthomonadales	Rhodanobacteraceae	0	0	0	0	0	0	0	0.000330542	0	0.00223001	0	0
739	Bacteria	Planctomycetota	Planctomycetes	Gemmatales	Gemmataceae	0	0	0	0	0	0	0	0.000330542	0	0.000836937	0	0
740	Bacteria	Bdellovibrionota	Bdellovibrionia	Bacteriovoracales	Bacteriovoracaceae	0	0	0	0	4.39522e-05	0	0	0.000330542	0	0.00080161	0	0
741	Bacteria	Verrucomicrobiota	Omnitrophia	Omnitrophales	Omnitrophaceae	0	0	2.67271e-05	0	0	0	0	0.000330542	0	0.000627703	0	0
742	Bacteria	Proteobacteria	Gammaproteobacteria	Burkholderiales	Comamonadaceae	0	0	0.000193947	0	0.000901752	0	0	0.000330542	0.000420181	0	0.000779862	0.000213835
743	Bacteria	SAR324_clade(Marine_group_B)	SAR324_clade(Marine_group_B)	SAR324_clade(Marine_group_B)	SAR324_clade(Marine_group_B)	0	0	5.44722e-05	0	0	0	0	0.000330542	0.000442674	0	0.000591877	0
744	Bacteria	Planctomycetota	BD7-11	BD7-11	BD7-11	0.000108968	0	0	0	0	0	0	0.000330542	6.98788e-05	0	0	0
745	Bacteria	Bdellovibrionota	Oligoflexia	Oligoflexales	uncultured	0	0	2.67271e-05	0	0	0	0	0.000330542	0	0	0	0
746	Bacteria	Patescibacteria	Parcubacteria	Candidatus_Kaiserbacteria	Candidatus_Kaiserbacteria	0	0	0	0	0	0	0	0.000330542	0	0	0	0
747	Bacteria	Verrucomicrobiota	Omnitrophia	Omnitrophales	Omnitrophales	0	0	0	0	0	0	0	0.000330542	0	0	0	0
748	Bacteria	Chloroflexi	Anaerolineae	SBR1031	SBR1031	2.09688e-05	0	0	0	0	0	0	0.000330542	0	0	0	0
749	Bacteria	Proteobacteria	Alphaproteobacteria	Rickettsiales	SM2D12	0	0	0	9.98452e-05	0	0	0	0.000330542	0	0	0	0
750	Bacteria	Proteobacteria	Gammaproteobacteria	Ectothiorhodospirales	Ectothiorhodospiraceae	2.09688e-05	0	0	0	0	0	0	0.000330542	0	0	0	0
751	Bacteria	Planctomycetota	Phycisphaerae	CCM11a	CCM11a	0	0	0	0.00019969	0	0	0	0.000330542	0	0	0	0
752	Bacteria	Bacteroidota	Bacteroidia	Sphingobacteriales	env.OPS_17	0	0	0.000114605	0.000748839	0	0.00072648	0	0.000330542	0	0	0	0
753	Archaea	Nanoarchaeota	Nanoarchaeia	Woesearchaeales	SCGC_AAA011-D5	0	0	3.52631e-05	0	0	0	0	0.000330542	0	0	0	0
754	Bacteria	Acidobacteriota	Acidobacteriae	Subgroup_2	Subgroup_2	0	8.49589e-05	0	0	0	0	0	0.000330542	0	0	0	0
755	Bacteria	Proteobacteria	Gammaproteobacteria	Burkholderiales	Hydrogenophilaceae	0.000195708	0.00108918	0.00089893	0.00319505	0	0	0	0.000330542	0	0	0	0
756	Bacteria	Bacteroidota	Bacteroidia	Sphingobacteriales	env.OPS_17	0	0	0	0	0	0	0	0.000330542	0	0	0	0
757	Bacteria	Proteobacteria	Alphaproteobacteria	Micavibrionales	uncultured	0	0	7.34994e-05	0	0	0	0	0.000319346	0	0	0	0
758	Bacteria	Dependentiae	Babeliae	Babeliales	Babeliales	0	0	0	0	0	0	0	0.000317746	0	0	0	0
759	Bacteria	Bacteroidota	Bacteroidia	Chitinophagales	Chitinophagaceae	0	0	0	0.000149768	0	0	0	0.000311349	0.000232929	0.0023695	0	0.000423044
760	Bacteria	Proteobacteria	Gammaproteobacteria	Diplorickettsiales	Diplorickettsiaceae	4.89271e-05	0	0.000264753	0	0	0	0	0.000311349	0.000472651	0	0	0
761	Bacteria	Verrucomicrobiota	Omnitrophia	Omnitrophales	Omnitrophaceae	0	0	6.68177e-05	0	0	0	0	0.000311349	0	0	0	0
762	Bacteria	Patescibacteria	Parcubacteria	Candidatus_Nomurabacteria	Candidatus_Nomurabacteria	0	0	0	0	0	0.000311349	0	0.000311349	0	0	0	0
763	Bacteria	Proteobacteria	Alphaproteobacteria	Rickettsiales	SM2D12	4.89271e-05	0	0	0	0	0	0	0.000311349	0.00019799	0	0	0
764	Bacteria	Proteobacteria	Gammaproteobacteria	Steroidobacterales	Woeseiaceae	0	0	0	0	0	0	0	0.000311349	0	0	0	0
765	Bacteria	Verrucomicrobiota	Omnitrophia	Omnitrophales	Omnitrophaceae	0	0	4.00906e-05	0	0	0	0	0.000311349	0	0	0	0
766	Bacteria	Proteobacteria	Alphaproteobacteria	Kiloniellales	Kiloniellaceae	0	0	0	0	0	0	0	0.000311349	0	0	0	0
767	Bacteria	Verrucomicrobiota	Verrucomicrobiae	Methylacidiphilales	Methylacidiphilaceae	0	0	9.07869e-05	0	0	0	0	0.000311349	0	0	0	0
768	Archaea	Nanoarchaeota	Nanoarchaeia	Woesearchaeales	Woesearchaeales	0	0	0	0	0	0	0	0.000311349	0	0	0	0
769	Bacteria	Cyanobacteria	Cyanobacteriia	Leptolyngbyales	Leptolyngbyaceae	0	0	0	0	0	0.000985937	0	0.000311349	0	0	0	0
770	Bacteria	Firmicutes	Clostridia	Clostridiales	Clostridiaceae	0	0	0.000140317	0	0	0	0	0.000311349	0	0	0	0
771	Bacteria	Proteobacteria	Gammaproteobacteria	Burkholderiales	Rhodocyclaceae	4.89271e-05	0	0	0	0	0	0	0.000311349	0	0	0	0
772	Bacteria	Bacteroidota	Bacteroidia	Cytophagales	Flammeovirgaceae	0	0	0	0	0	0	0	0.000311349	0	0	0	0
773	Bacteria	Bacteroidota	Kapabacteria	Kapabacteriales	Kapabacteriales	0	0	7.9342e-05	0	5.83465e-05	0	0	0.000311349	0	0	0	0
774	Bacteria	Proteobacteria	Gammaproteobacteria	Burkholderiales	TRA3-20	0	0	0	0	0	0	0	0.000302997	0.000579027	0	0	0
775	Bacteria	Patescibacteria	Parcubacteria	Parcubacteria	Parcubacteria	4.19375e-05	0	0	0	0	0	0	0.000302997	0.00248463	0	0.00294297	0
776	Bacteria	Planctomycetota	Planctomycetes	Gemmatales	Gemmataceae	0	0	0	0	0	0	0	0.000302997	0	0	0	0
777	Bacteria	Bdellovibrionota	Oligoflexia	Silvanigrellales	Silvanigrellaceae	2.09688e-05	0	0	0	0	0	0	0.000302997	0	0	0.00042038	0
778	Bacteria	Desulfobacterota	Desulfobulbia	Desulfobulbales	Desulfobulbaceae	0	0	0	0	0	0	0	0.000302997	0.000350414	0	0.000516581	0
779	Bacteria	Patescibacteria	Gracilibacteria	Gracilibacteria	Gracilibacteria	0	0	8.6863e-05	0	0.000732536	0	0	0.000302997	0.000491035	0	0	0
780	Bacteria	Proteobacteria	Gammaproteobacteria	Methylococcales	Methylomonadaceae	0	0	0	0	0	0	0	0.000302997	0	0	0	0
781	Bacteria	Proteobacteria	Alphaproteobacteria	Rhizobiales	A0839	0	0	0	0	0	0	0.000661084	0.000302997	0	0	0.000161835	0
782	Archaea	Crenarchaeota	Nitrososphaeria	Nitrosopumilales	Nitrosopumilaceae	0	0	0	0	0	0	0	0.000302997	0	0.00259549	0	0
783	Bacteria	Proteobacteria	Gammaproteobacteria	Burkholderiales	Sutterellaceae	0	0	0	0.000224652	0	0	0	0.000302997	0	0.000767192	0	0
784	Bacteria	Patescibacteria	Parcubacteria	Candidatus_Kaiserbacteria	Candidatus_Kaiserbacteria	0	0	2.00453e-05	0	0	0	0	0.000302997	0	0	0	0
785	Bacteria	Bacteroidota	Bacteroidia	Chitinophagales	Chitinophagaceae	0	0.000133387	0	0	0	0	0	0.000302997	0	0	0	0
786	Bacteria	Bacteroidota	Bacteroidia	Cytophagales	Hymenobacteraceae	3.49479e-05	0	0	0	6.58263e-05	0	0	0.000302997	0	0	0	0
787	Bacteria	Proteobacteria	Gammaproteobacteria	Gammaproteobacteria_Incertae_Sedis	Unknown_Family	0	0	0.000173726	0	0	0	0	0.000302997	0	0	0	0
788	Bacteria	Dependentiae	Babeliae	Babeliales	Vermiphilaceae	0	0	0	0	0	0	0	0.000302997	0	0	0	0
789	Bacteria	Proteobacteria	Alphaproteobacteria	Rhodospirillales	uncultured	0	0	2.67271e-05	0	0	0	0	0.000302997	0	0	0	0
790	Bacteria	Gemmatimonadota	Gemmatimonadetes	Gemmatimonadales	Gemmatimonadaceae	0	0	3.34088e-05	0	0	0	0	0.000302997	0	0	0	0
791	Bacteria	Proteobacteria	Alphaproteobacteria	Rickettsiales	SM2D12	0	0	0.0001675	0	0	0	0	0.000302997	0	0	0	0
792	Bacteria	Bacteroidota	Bacteroidia	Cytophagales	Hymenobacteraceae	2.09688e-05	0	0.000123421	0.000224652	0.000131857	0	0.000385632	0.000302997	0	0	0	0
793	Bacteria	Firmicutes	Clostridia	Lachnospirales	Lachnospiraceae	0	5.09753e-05	0	0	0	0	0	0.000302997	0	0	0	0
794	Bacteria	Verrucomicrobiota	Omnitrophia	Omnitrophales	Omnitrophaceae	0	0	0	0.000149768	0	0	0	0.000302997	0	0	0	0
795	Bacteria	Firmicutes	Negativicutes	Veillonellales-Selenomonadales	Sporomusaceae	0	0	6.68177e-05	0	0	0	0	0.000302997	0	0	0	0
796	Bacteria	Acidobacteriota	Subgroup_22	Subgroup_22	Subgroup_22	0	0	0	0.00019969	0	0	0	0.000302997	0	0	0	0
797	Bacteria	Proteobacteria	Gammaproteobacteria	Burkholderiales	Burkholderiaceae	0.000132802	0	4.67724e-05	0	0.000175537	0	0	0.000302997	0	0	0	0
798	Bacteria	Proteobacteria	Gammaproteobacteria	Xanthomonadales	Xanthomonadaceae	0.000377438	0	0.00152925	0.000673955	0.0045221	0.00124539	0.00247907	0.000302997	0	0	0	0
799	Archaea	Nanoarchaeota	Nanoarchaeia	Woesearchaeales	Woesearchaeales	5.59167e-05	0	0	7.48839e-05	3.29131e-05	0	0	0.000291801	0	0	0	0
800	Bacteria	Desulfobacterota	Desulfobulbia	Desulfobulbales	Desulfurivibrionaceae	0	0	0	0.000299536	0	0	0	0.000285403	0	0	0	0
801	Bacteria	Patescibacteria	Gracilibacteria	Gracilibacteria	Gracilibacteria	0	0	0	0	0	0	0	0.000285403	0.00108192	0.000488213	0.000651573	0
802	Bacteria	Acidobacteriota	Blastocatellia	2025-11-24	2025-11-24	0	0	0	0	0	0	0	0.000285403	0.00089339	0	0	0
803	Bacteria	Firmicutes	Clostridia	Clostridia	Hungateiclostridiaceae	0	0	3.34088e-05	0.000149768	0	0	0	0.000285403	0	0	0	0.000461503
804	Bacteria	Proteobacteria	Gammaproteobacteria	Diplorickettsiales	Diplorickettsiaceae	0	0	0	0	0	0	0	0.000285403	0.000292282	0	0.000741835	0.00042767
805	Bacteria	Actinobacteriota	Acidimicrobiia	uncultured	uncultured	0	0	0	7.48839e-05	0	0	0	0.000285403	0.000235185	0	0	0
806	Bacteria	Bdellovibrionota	Bdellovibrionia	Bacteriovoracales	Bacteriovoracaceae	0.000118823	0	0	0	8.77684e-05	0	0	0.000285403	5.10777e-05	0	0	0
807	Bacteria	Cyanobacteria	Cyanobacteriia	Pseudanabaenales	Pseudanabaenaceae	0	0	0.000105789	0	0	0	0	0.000285403	0	0	0	0
808	Bacteria	Verrucomicrobiota	Verrucomicrobiae	Pedosphaerales	Pedosphaeraceae	0	0	0	0	0	0	0	0.000285403	0	0	0	0
809	Bacteria	Desulfobacterota	Desulfuromonadia	Geobacterales	Geobacteraceae	0	0	0.00011359	0	0	0	0	0.000285403	0	0	0	0
810	Bacteria	Acidobacteriota	Vicinamibacteria	Vicinamibacterales	Vicinamibacteraceae	0	0	0.00103497	0	0	0	0	0.000285403	0	0	0	0
811	Bacteria	Proteobacteria	Gammaproteobacteria	Coxiellales	Coxiellaceae	0	0	0	0	0	0	0	0.000285403	0	0	0	0
812	Bacteria	FCPU426	FCPU426	FCPU426	FCPU426	0	0	2.67271e-05	0	0	0	0	0.000285403	0	0	0	0
813	Bacteria	Bacteroidota	Bacteroidia	Cytophagales	Microscillaceae	0	0	0	0	0.000511237	0	0	0.000285403	0	0	0	0
814	Bacteria	Proteobacteria	Alphaproteobacteria	Rickettsiales	Mitochondria	0	0	0.00355859	0.000524188	0	0.000467023	0	0.000285403	0	0	0	0
815	Bacteria	Bacteroidota	Bacteroidia	Bacteroidales	Prolixibacteraceae	0	0.000169918	0	0.000499226	0	0	0	0.000285403	0	0	0	0
816	Bacteria	Proteobacteria	Gammaproteobacteria	Coxiellales	Coxiellaceae	0	0	0	0	0	0	0	0.000285403	0	0	0	0
817	Bacteria	Firmicutes	Bacilli	Alicyclobacillales	Alicyclobacillaceae	0	0	2.64473e-05	0	0	0	0	0.000275452	0.000361347	0.000906682	0.00254059	0.000534588
818	Bacteria	Verrucomicrobiota	Chlamydiae	LD1-PA32	LD1-PA32	0	0	3.34088e-05	0	0	0	0	0.000275452	0.000980343	0	0	0
819	Bacteria	Bdellovibrionota	Oligoflexia	0319-6G20	0319-6G20	0	0	0	0	0	0	0	0.000275452	0	0	0	0
820	Bacteria	Deinococcota	Deinococci	Thermales	Thermaceae	0	0	3.34088e-05	0.000174729	0	0	0	0.000275452	0	0	0	0
821	Bacteria	Proteobacteria	Alphaproteobacteria	Sphingomonadales	Sphingomonadaceae	0	0	0	0	0	0	0	0.000275452	0.000187431	0	0.00104944	0
822	Bacteria	Proteobacteria	Alphaproteobacteria	Sphingomonadales	Sphingomonadaceae	0	0	0	0	0	0	0	0.000275452	0	0	0	0
823	Bacteria	Proteobacteria	Alphaproteobacteria	Rickettsiales	SM1B06	0	0	0	0	7.67973e-05	0	0	0.000275452	0	0.00251737	0	0
824	Bacteria	Proteobacteria	Alphaproteobacteria	Rickettsiales	SM2D12	0	0	0	0	0	0	0	0.000275452	0	0.00191662	0	0.000384586
825	Bacteria	Myxococcota	Polyangia	mle1-27	mle1-27	0	0	0	0	0	0	0	0.000275452	0	0.000418468	0	0
826	Bacteria	Planctomycetota	Planctomycetes	Pirellulales	Pirellulaceae	0	0	0	0.00019969	0	0	0	0.000275452	0.000104818	0	0.000161835	0.000833798
827	Archaea	Nanoarchaeota	Nanoarchaeia	Woesearchaeales	Woesearchaeales	0	0.000271868	0	0	0	0	0	0.000275452	0.000349541	0	0	0
828	Bacteria	Firmicutes	Bacilli	Paenibacillales	Paenibacillaceae	0.000644884	0	0	0	0	0	0	0.000275452	0.000114088	0	0	0
829	Bacteria	Bacteroidota	Bacteroidia	SM1A07	SM1A07	0	0	0.000149868	0.000424342	0	0	0	0.000275452	0	0	0.000955213	0
830	Bacteria	Bacteroidota	Bacteroidia	Cytophagales	Spirosomaceae	0.000214961	0	0	0	0	0	0	0.000275452	0	0	0.000588591	0
831	Bacteria	Proteobacteria	Gammaproteobacteria	Xanthomonadales	Rhodanobacteraceae	0	0	0	0	0	0	0	0.000275452	0	0	0.000364329	0
832	Bacteria	Bacteroidota	Bacteroidia	Bacteroidales	Rikenellaceae	0	0	2.67271e-05	0	0	0	0	0.000275452	0	0	0	0
833	Bacteria	Proteobacteria	Gammaproteobacteria	PLTA13	PLTA13	0	0	0.000108944	0	0	0	0	0.000275452	0	0	0	0
834	Bacteria	Bacteroidota	Bacteroidia	Chitinophagales	Saprospiraceae	0	0	0.000144241	0	0	0	0	0.000275452	0	0	0	0
835	Bacteria	Bacteroidota	Bacteroidia	Cytophagales	Cytophagaceae	0	0	0.000181574	0	0	0	0	0.000275452	0	0	0	0
836	Bacteria	Bacteroidota	Bacteroidia	Bacteroidales	Bacteroidaceae	0	0	0	0	0	0	0	0.000275452	0	0	0	0
837	Bacteria	Proteobacteria	Alphaproteobacteria	Rickettsiales	SM2D12	7.68854e-05	0	0	0	0	0	0	0.000275452	0	0	0	0
838	Bacteria	Planctomycetota	OM190	OM190	OM190	0	0	0	0	0	0	0	0.000275452	0	0	0	0
839	Bacteria	Proteobacteria	Alphaproteobacteria	Rhodospirillales	uncultured	0	0	0	0.000274574	0	0	0	0.000275452	0	0	0	0
840	Bacteria	Bacteroidota	Bacteroidia	Sphingobacteriales	env.OPS_17	0.00017474	0	0	0	0	0	0	0.000275452	0	0	0	0
841	Bacteria	Proteobacteria	Gammaproteobacteria	Xanthomonadales	Xanthomonadaceae	0	0	0.000105789	0	0	0	0	0.000275452	0	0	0	0
842	Bacteria	Bdellovibrionota	Oligoflexia	0319-6G20	0319-6G20	0	0	0	0.000274574	0	0	0	0.000275452	0	0	0	0
843	Bacteria	Verrucomicrobiota	Verrucomicrobiae	Pedosphaerales	Pedosphaeraceae	0	0	2.64473e-05	0	0	0	0	0.000275452	0	0	0	0
844	Bacteria	Acidobacteriota	Holophagae	Subgroup_7	Subgroup_7	0	0	0	0	0	0	0	0.000275452	0	0	0	0
845	Bacteria	Proteobacteria	Alphaproteobacteria	Rhodospirillales	uncultured	0	0	0.000170753	0	0	0	0	0.000275452	0	0	0	0
846	Bacteria	Acidobacteriota	Subgroup_22	Subgroup_22	Subgroup_22	0	0	0	0	0	0	0	0.000275452	0	0	0	0
847	Archaea	Halobacterota	Methanosarcinia	Methanosarciniales	ANME-2c	0	0	0	0.000224652	0	0	0	0.000275452	0	0	0	0
848	Bacteria	Nitrospirota	Nitrospiria	Nitrospirales	Nitrospiraceae	0	0	0	0.000124807	0	0	0.000826355	0.000275452	0	0	0	0
849	Bacteria	Verrucomicrobiota	Verrucomicrobiae	Opitutales	Puniceicoccaceae	0	0	6.17104e-05	0	0	0	0	0.000267454	0.000153233	0	0	0
850	Bacteria	Proteobacteria	Gammaproteobacteria	Burkholderiales	Neisseriaceae	0	0	0.000106908	0	0	0	0	0.000265855	0	0	0	0
851	Bacteria	Bacteroidota	Bacteroidia	Chitinophagales	Saprospiraceae	4.19375e-05	0	0.000163416	0	0	0	0	0.000259457	0	0	0.00150881	0.000423044
852	Bacteria	Proteobacteria	Alphaproteobacteria	Rickettsiales	Mitochondria	0	6.79671e-05	0	0	0	0	0	0.000259457	0	0	0	0
853	Bacteria	Firmicutes	Clostridia	Oscillospirales	Ethanoligenenaceae	0	0	3.34088e-05	0	0	0	0	0.000259457	4.65858e-05	0	0	0
854	Bacteria	Proteobacteria	Alphaproteobacteria	Rickettsiales	Rickettsiaceae	0	0	8.81578e-05	0	0	0	0	0.000259457	0	0	0	0
855	Bacteria	Myxococcota	Myxococcia	Myxococcales	Anaeromyxobacteraceae	0	0	0	0	3.88976e-05	0	0	0.000259457	0	0	0	0
856	Bacteria	Chloroflexi	Anaerolineae	Anaerolineales	Anaerolineaceae	0	0	0	0.000349458	0	0	0	0.000259457	0	0	0	0
857	Bacteria	Proteobacteria	Gammaproteobacteria	Burkholderiales	Hydrogenophilaceae	0.000454323	0.000766973	0.000893269	0.00626529	0	0	0.00495813	0.000259457	0.000481109	0	0	0
858	Bacteria	Planctomycetota	Phycisphaerae	mle1-8	mle1-8	0	0	0	0	0	0	0	0.000259457	0	0	0	0
859	Bacteria	Myxococcota	Polyangia	FFCH16767	FFCH16767	0	0	0	0	0	0	0.000275452	0.000259457	0.000841729	0	0	0
860	Bacteria	SAR324_clade(Marine_group_B)	SAR324_clade(Marine_group_B)	SAR324_clade(Marine_group_B)	SAR324_clade(Marine_group_B)	0	0	0	0	0	0	0	0.000259457	0.000419273	0	0	0
861	Bacteria	Proteobacteria	Gammaproteobacteria	Xanthomonadales	Rhodanobacteraceae	4.19375e-05	0	0	0	0	0	0	0.000259457	0.000255389	0	0	0
862	Bacteria	Planctomycetota	OM190	OM190	OM190	0	0	0	0.00019969	0	0	0	0.000259457	6.98788e-05	0	0	0
863	Bacteria	Proteobacteria	Gammaproteobacteria	Burkholderiales	Nitrosomonadaceae	0	0	0.000232743	0	0.000322316	0	0	0.000259457	0	0	0	0
864	Bacteria	Verrucomicrobiota	Omnitrophia	Omnitrophales	Omnitrophaceae	0.000118823	0	0	0	0	0	0	0.000259457	0	0	0	0
865	Bacteria	Proteobacteria	Alphaproteobacteria	Rickettsiales	Rickettsiaceae	0	0	0	0	5.48552e-05	0	0	0.000259457	0	0	0	0
866	Bacteria	Firmicutes	Clostridia	Clostridiales	Clostridiaceae	0	0	0.000167044	0	0	0	0	0.000259457	0	0	0	0
867	Bacteria	Proteobacteria	Gammaproteobacteria	Enterobacterales	Morganellaceae	0	0	0	0	0	0	0	0.000259457	0	0	0	0
868	Bacteria	Deinococcota	Deinococci	Deinococcales	Deinococcaceae	0	0	0	0	0	0.00166053	0	0.000259457	0	0	0	0
869	Bacteria	Proteobacteria	Alphaproteobacteria	Rickettsiales	SM2D12	0	0	0	0	0	0	0	0.000259457	0	0	0	0
870	Bacteria	Actinobacteriota	Acidimicrobiia	IMCC26256	IMCC26256	0	0	0	0	0	0	0	0.000259457	0	0	0	0
871	Bacteria	Bacteroidota	Bacteroidia	Bacteroidales	SB-5	0	0	0	0	0	0	0	0.000259457	0	0	0	0
872	Bacteria	Spirochaetota	Spirochaetia	Spirochaetales	Spirochaetaceae	0	0	0	0.000224652	0	0	0	0.000259457	0	0	0	0
873	Bacteria	Desulfobacterota	Desulfobulbia	Desulfobulbales	Desulfobulbaceae	0	0	0	0	0	0	0	0.000247907	0.000510195	0	0.000476431	0
874	Bacteria	Bdellovibrionota	Bdellovibrionia	Bacteriovoracales	Bacteriovoracaceae	0	0	0	0	0	0	0	0.000247907	0.00044651	0.000278979	0.000221969	0
875	Bacteria	Planctomycetota	Pla4_lineage	Pla4_lineage	Pla4_lineage	0	0	0	4.99226e-05	0	0	0	0.000247907	0	0	0	0
876	Bacteria	Planctomycetota	vadinHA49	vadinHA49	vadinHA49	0	0	0	0	0.000822829	0	0	0.000247907	0.000427394	0	0.000308279	0
877	Bacteria	Proteobacteria	Gammaproteobacteria	uncultured	uncultured	0	0	0	0	0	0	0	0.000247907	0	0	0	0
878	Bacteria	Campilobacterota	Campylobacteria	Campylobacterales	Arcobacteraceae	0	8.49589e-05	0	0	0	0	0	0.000247907	0	0	0	0
879	Bacteria	Bdellovibrionota	Oligoflexia	Oligoflexales	uncultured	0	0	6.17104e-05	0	0	0	0	0.000247907	0	0	0	0
880	Bacteria	Bacteroidota	Bacteroidia	Flavobacteriales	Flavobacteriaceae	0	0	0	0	0.000408425	0	0	0.000247907	0	0	0	0
881	Bacteria	Bacteroidota	Bacteroidia	Cytophagales	Spirosomaceae	0	0	0	0	0	0	0	0.000247907	0.000264585	0	0.000533762	0
882	Bacteria	Bdellovibrionota	Oligoflexia	Oligoflexales	uncultured	0	0	0	0	0	0	0	0.000247907	0.000151404	0.00114943	0.000475647	0.00188447
883	Bacteria	Proteobacteria	Gammaproteobacteria	FGL7S	FGL7S	4.19375e-05	0	0	0.000324497	0	0	0	0.000247907	0	0.000627703	0	0
884	Bacteria	Calditrichota	Calditrichia	Calditrichales	Calditrichaceae	0	0.000101951	0	0	0	0	0	0.000247907	0.000152525	0	0.000415513	0.00635109
885	Bacteria	Cyanobacteria	Cyanobacteriia	Chloroplast	Chloroplast	0.000788191	0	0	0	0	0	0	0.000247907	6.98788e-05	0	0	0
886	Bacteria	Cyanobacteria	Cyanobacteriia	Chloroplast	Chloroplast	0	0	0	0	0.000307665	0	0	0.000247907	0	0	0.000252228	0
887	Bacteria	Bdellovibrionota	Oligoflexia	Silvanigrellales	Silvanigrellaceae	0	0	0	0	9.87394e-05	0	0	0.000247907	0	0	0	0
888	Bacteria	Bacteroidota	Bacteroidia	Bacteroidales	Dysgonomonadaceae	6.29063e-05	0	0	0	0	0	0	0.000247907	0	0	0	0
889	Bacteria	Myxococcota	Polyangia	Polyangiales	Sandaracinaceae	0	0	7.05262e-05	0	0	0	0	0.000247907	0	0	0	0
890	Bacteria	Proteobacteria	Gammaproteobacteria	Coxiellales	Coxiellaceae	0	0	0	0	0	0	0	0.000247907	0	0	0	0
891	Bacteria	Acidobacteriota	Vicinamibacteria	Subgroup_17	Subgroup_17	0	0	7.9342e-05	0	0	0	0	0.000247907	0	0	0	0
892	Bacteria	Proteobacteria	Alphaproteobacteria	Rickettsiales	Mitochondria	0	0	0	0	0	0	0	0.000247907	0	0	0	0
893	Bacteria	Bacteroidota	Bacteroidia	Chitinophagales	Chitinophagaceae	0	0	5.34541e-05	0	0.00411773	0	0	0.000247907	0	0	0	0
894	Bacteria	Proteobacteria	Alphaproteobacteria	Caulobacterales	Hyphomonadaceae	0	0	0	0.000299536	0	0	0	0.000247907	0	0	0	0
895	Bacteria	Proteobacteria	Gammaproteobacteria	Coxiellales	Coxiellaceae	0.000125813	0	0.000108944	0.000549149	0	0	0	0.000247907	0	0	0	0
896	Bacteria	Patescibacteria	Parcubacteria	Parcubacteria	Parcubacteria	0	0	0	0	0	0	0	0.000247907	0	0	0	0
897	Bacteria	Chloroflexi	KD4-96	KD4-96	KD4-96	0	0	2.64473e-05	0	0	0	0	0.000247907	0	0	0	0
898	Bacteria	Proteobacteria	Alphaproteobacteria	Rickettsiales	Mitochondria	0	0	6.68177e-05	0	0	0	0	0.000247907	0	0	0	0
899	Bacteria	Patescibacteria	Parcubacteria	Candidatus_Nomurabacteria	Candidatus_Nomurabacteria	0	8.49589e-05	0	0	0	0	0	0.000243108	0	0	0	0
900	Archaea	Crenarchaeota	Nitrososphaeria	Nitrosopumilales	Nitrosopumilaceae	0	0	0	0.000249613	0	0	0	0.000241509	0	0	0	0
901	Bacteria	Bacteroidota	Bacteroidia	Chitinophagales	Saprospiraceae	0	0	0	0	0	0	0	0.000233511	0.00103032	0.000767192	0.000138715	0
902	Bacteria	Proteobacteria	Gammaproteobacteria	Methylococcales	Methylomonadaceae	0	0.000713655	0	0	0	0	0	0.000233511	0	0	0	0
903	Bacteria	Patescibacteria	Gracilibacteria	JGI_0000069-P22	JGI_0000069-P22	0	0	0	0	0	0	0	0.000233511	0.000146685	0	0	0
904	Bacteria	Desulfobacterota	Desulfobacteria	Desulfobacterales	Desulfobacteraceae	0	0.000322844	0	0	0	0	0	0.000233511	0	0	0	0
905	Bacteria	Bacteroidota	Bacteroidia	Cytophagales	Spirosomaceae	9.78542e-05	0	0	0	0	0	0	0.000233511	0	0	0	0
906	Bacteria	Proteobacteria	Gammaproteobacteria	Coxiellales	Coxiellaceae	0	0	0	0	0	0	0	0.000233511	9.31717e-05	0	0.000208073	0.000944548
907	Bacteria	Bdellovibrionota	Oligoflexia	Oligoflexales	uncultured	0	0	9.35447e-05	0	0	0	0	0.000233511	0.000139758	0	0	0
908	Bacteria	Bacteroidota	Bacteroidia	Chitinophagales	Saprospiraceae	0	0	0.000380022	0	0.000175552	0	0	0.000233511	0	0	0	0.00080763
909	Bacteria	Proteobacteria	Gammaproteobacteria	Legionellales	Legionellaceae	0	0	2.67271e-05	0	0	0	0	0.000233511	0.000610216	0	0.000231192	0
910	Bacteria	Verrucomicrobiota	Omnitrophia	Omnitrophales	Omnitrophaceae	0	0	2.67271e-05	0	0	0	0	0.000233511	0.000252624	0	0	0
911	Bacteria	Proteobacteria	Alphaproteobacteria	Rickettsiales	Mitochondria	0	0	0	0	0	0	0	0.000233511	0.00019799	0	0.000231192	0
912	Bacteria	Proteobacteria	Gammaproteobacteria	Burkholderiales	Oxalobacteraceae	0	0	6.01359e-05	0	0	0	0	0.000233511	0	0	0	0
913	Bacteria	Proteobacteria	Gammaproteobacteria	Burkholderiales	Comamonadaceae	0.000118823	0	0.000211579	0	0	0	0	0.000233511	0	0	0	0
914	Bacteria	Bdellovibrionota	Oligoflexia	Oligoflexales	uncultured	0	0	3.34088e-05	0	0	0	0	0.000233511	0	0	0	0
915	Bacteria	Proteobacteria	Gammaproteobacteria	KF-JG30-C25	KF-JG30-C25	0	0	0	0.000174729	0	0	0	0.000233511	0	0	0	0
916	Bacteria	Bacteroidota	Bacteroidia	Flavobacteriales	Flavobacteriaceae	0	0	0	0.000249613	0	0	0	0.000233511	0	0	0	0
917	Bacteria	Campilobacterota	Campylobacteria	Campylobacterales	Sulfurimonadaceae	0	0	0	0	0	0	0	0.000233511	0	0	0	0
918	Bacteria	Bdellovibrionota	Bdellovibrionia	Bdellovibrionales	Bdellovibrionaceae	0	0	3.34088e-05	0	0	0	0	0.000233511	0	0	0	0
919	Bacteria	Proteobacteria	Alphaproteobacteria	Paracaedibacterales	Paracaedibacteraceae	1.39792e-05	0	0	0	0	0	0	0.000233511	0	0	0	0
920	Bacteria	Firmicutes	Bacilli	Thermoactinomycetales	Thermoactinomycetaceae	0	0	3.34088e-05	0	0	0	0	0.000233511	0	0	0	0
921	Bacteria	Cyanobacteria	Cyanobacteriia	Chloroplast	Chloroplast	0	0	0	0	0	0	0	0.000233511	0	0	0	0
922	Bacteria	Bacteroidota	Bacteroidia	Bacteroidales	Rikenellaceae	0	0	2.64473e-05	0	0	0	0.000165271	0.000233511	0	0	0	0
923	Bacteria	Firmicutes	Limnochordia	Limnochordales	Limnochordaceae	0	0	2.00453e-05	0	0	0	0	0.000233511	0	0	0	0
924	Bacteria	Desulfobacterota	Desulfobulbia	Desulfobulbales	Desulfocapsaceae	0	0	0	0	0	0	0	0.000233511	0	0	0	0
925	Bacteria	Proteobacteria	Alphaproteobacteria	Rickettsiales	SM2D12	0	0	0	0	0.000278364	0	0	0.000233511	0	0	0	0
926	Bacteria	Verrucomicrobiota	Chlamydiae	Chlamydiales	Parachlamydiaceae	0	0	0	0	0	0	0	0.000233511	0	0	0	0
927	Archaea	Micrarchaeota	Micrarchaeia	Micrarchaeales	CG1-02-32-21	0	0	0	4.99226e-05	0	0	0	0.000233511	0	0	0	0
928	Bacteria	Proteobacteria	Alphaproteobacteria	Rhodospirillales	uncultured	1.39792e-05	0	0.000230329	0	4.38842e-05	0	0	0.000220361	0	0	0	0
929	Bacteria	Verrucomicrobiota	Chlamydiae	Chlamydiales	cvE6	0	0	9.35447e-05	0	0	0	0	0.000220361	0	0	0	0
930	Bacteria	Firmicutes	Bacilli	Paenibacillales	Paenibacillaceae	0	0	0	0	0	0.00217944	0	0.000220361	0.000154834	0	0	0
931	Bacteria	Proteobacteria	Gammaproteobacteria	Cellvibrionales	Cellvibrionaceae	0	0	0	0	0	0	0	0.000220361	0.000353358	0	0	0
932	Bacteria	Planctomycetota	Planctomycetes	Pirellulales	Pirellulaceae	0	0	0	0	0	0	0	0.000220361	0	0	0	0
933	Bacteria	Dependentiae	Babeliae	Babeliales	Babeliales	0	0	5.74424e-05	0	0	0	0	0.000220361	0	0	0	0
934	Bacteria	Verrucomicrobiota	Omnitrophia	Omnitrophales	Omnitrophaceae	0	0	2.67271e-05	0	0	0	0	0.000220361	0	0.00286609	0	0
935	Bacteria	Bacteroidota	Bacteroidia	Cytophagales	Microscillaceae	0	0	0.000423157	0	0.000322316	0.00166053	0.000881446	0.000220361	0	0.00143769	0	0
936	Bacteria	Verrucomicrobiota	Verrucomicrobiae	Pedosphaerales	Pedosphaeraceae	0	0	4.00906e-05	0	0	0	0	0.000220361	0	0.000383142	0	0
937	Archaea	Nanoarchaeota	Nanoarchaeia	Woesearchaeales	SCGC_AAA011-D5	2.79583e-05	0	0	0	0	0	0	0.000220361	0	0.000278979	0	0
938	Bacteria	Bdellovibrionota	Oligoflexia	0319-6G20	0319-6G20	0.000125813	0	0	0	0	0	0	0.000220361	0.000920443	0	0	0
939	Bacteria	Bacteroidota	Bacteroidia	Sphingobacteriales	AKYH767	0	0	1.33635e-05	0	0	0	0	0.000220361	0.000232929	0	0.000168152	0
940	Bacteria	Bacteroidota	Bacteroidia	Cytophagales	Flammeovirgaceae	7.16538e-05	0	0	0	0.00020511	0	0	0.000220361	0.000154121	0	0	0
941	Bacteria	Bacteroidota	Bacteroidia	Chitinophagales	Saprospiraceae	0	0	3.52631e-05	0.000149768	0.000102555	0.00036324	0	0.000220361	0.000128111	0	0	0
942	Bacteria	Armatimonadota	Armatimonadia	Armatimonadales	Armatimonadaceae	0.000146781	0	0	0	0	0	0	0.000220361	0.000116465	0	0	0
943	Bacteria	Verrucomicrobiota	Omnitrophia	Omnitrophales	Omnitrophales	0	0	0	0	0	0	0	0.000220361	0	0	6.34196e-05	0
944	Bacteria	Bacteroidota	Bacteroidia	Cytophagales	Spirosomaceae	0	0	0	0	0	0	0	0.000220361	0	0	0	0
945	Bacteria	Actinobacteriota	Actinobacteria	Micrococcales	Microbacteriaceae	0.00353136	0	0	0	0.000272283	0	0	0.000220361	0	0	0	0
946	Bacteria	Nitrospirota	Nitrospiria	Nitrospirales	Nitrospiraceae	0	0	0	0.000124807	0	0	0	0.000220361	0	0	0	0
947	Bacteria	Proteobacteria	Alphaproteobacteria	Rhodobacterales	Rhodobacteraceae	0	0	0	0.000224652	0	0	0	0.000220361	0	0	0	0
948	Bacteria	Bacteroidota	Bacteroidia	SM1A07	SM1A07	0	0	5.44722e-05	0	0	0	0	0.000220361	0	0	0	0
949	Bacteria	Bacteroidota	Bacteroidia	Chitinophagales	Chitinophagaceae	0	0	0	0	0	0	0	0.000220361	0	0	0	0
950	Bacteria	Firmicutes	Clostridia	Clostridiales	Clostridiaceae	0.0003105	0	0	0	0	0	0	0.000220361	0	0	0	0
951	Bacteria	Proteobacteria	Alphaproteobacteria	Rhodobacterales	Rhodobacteraceae	0	0	0	0	0	0	0	0.000220361	0	0	0	0
952	Bacteria	Bacteroidota	Bacteroidia	Flavobacteriales	Flavobacteriaceae	0.000209688	0	0	0	0	0	0	0.000220361	0	0	0	0
953	Bacteria	Firmicutes	Clostridia	Peptostreptococcales-Tissierellales	Fusibacteraceae	0	0	0	0.000149768	0	0	0	0.000220361	0	0	0	0
954	Bacteria	Bacteroidota	Bacteroidia	Bacteroidales	Bacteroidetes_vadinHA17	0	0	6.17104e-05	0	0	0	0	0.000220361	0	0	0	0
955	Bacteria	Bacteroidota	Bacteroidia	Flavobacteriales	Crocinitomicaceae	5.59167e-05	0	0	0	0	0	0	0.000220361	0	0	0	0
956	Bacteria	Bacteroidota	Bacteroidia	Sphingobacteriales	E6aC02	0	0	0	0.00019969	0	0	0	0.000220361	0	0	0	0
957	Bacteria	Acidobacteriota	Vicinamibacteria	Vicinamibacterales	uncultured	0	0	0	0	0	0	0.00104672	0.000220361	0	0	0	0
958	Bacteria	SAR324_clade(Marine_group_B)	SAR324_clade(Marine_group_B)	SAR324_clade(Marine_group_B)	SAR324_clade(Marine_group_B)	0	0	0	0	0	0	0	0.000220361	0	0	0	0
959	Bacteria	Proteobacteria	Alphaproteobacteria	uncultured	uncultured	0	0	0	0	0	0	0	0.000220361	0	0	0	0
960	Bacteria	Proteobacteria	Alphaproteobacteria	Rickettsiales	Mitochondria	0	6.79671e-05	0	0	0	0	0	0.000220361	0	0	0	0
961	Bacteria	Firmicutes	Clostridia	Clostridia	Hungateiclostridiaceae	0	0	0	0	0	0	0	0.000220361	0	0	0	0
962	Bacteria	Bacteroidota	Bacteroidia	Flavobacteriales	Crocinitomicaceae	8.3875e-05	0	0	0	0	0	0	0.000220361	0	0	0	0
963	Bacteria	Dependentiae	Babeliae	Babeliales	Babeliales	0	0	0	0	0	0	0	0.000220361	0	0	0	0
964	Bacteria	Bdellovibrionota	Oligoflexia	Oligoflexales	uncultured	0.000181729	0	0.000126954	0	0	0	0	0.000220361	0	0	0	0
965	Bacteria	Planctomycetota	OM190	OM190	OM190	0	0	0	0.000599071	0	0	0	0.000220361	0	0	0	0
966	Bacteria	Bdellovibrionota	Oligoflexia	Oligoflexales	uncultured	0	0	0	0	0	0	0	0.000220361	0	0	0	0
967	Bacteria	Acidobacteriota	Vicinamibacteria	Vicinamibacterales	Vicinamibacteraceae	0	0	0	0	0	0	0	0.000220361	0	0	0	0
968	Bacteria	Proteobacteria	Gammaproteobacteria	Ectothiorhodospirales	Ectothiorhodospiraceae	0	0	0	0	0	0	0	0.000212364	0	0	0	0
969	Bacteria	Proteobacteria	Gammaproteobacteria	Diplorickettsiales	Diplorickettsiaceae	0.000167192	0	0	0	0	0	0	0.000207566	0.000296595	0	0	0
970	Bacteria	Cyanobacteria	Cyanobacteriia	Ambiguous_taxa	Ambiguous_taxa	0	0	0	0.000449304	0.00020845	0	0	0.000207566	0.000245517	0	0	0
971	Bacteria	Firmicutes	Incertae_Sedis	DTU014	DTU014	0	0	0	0.000349458	0	0	0	0.000207566	0	0	0	0
972	Bacteria	Proteobacteria	Gammaproteobacteria	Diplorickettsiales	Diplorickettsiaceae	0	0	0	0	0	0	0	0.000207566	0	0	0	0
973	Bacteria	Firmicutes	Limnochordia	Limnochordia	Limnochordia	0	0	0.000126954	0	0	0	0	0.000207566	4.8895e-05	0.000209234	0	0.000320753
974	Bacteria	Proteobacteria	Ambiguous_taxa	Ambiguous_taxa	Ambiguous_taxa	0	0	0	0	0	0	0	0.000207566	0.000646931	0	0.000208073	0
975	Bacteria	Chloroflexi	Anaerolineae	SBR1031	A4b	0	0	3.34088e-05	0	0	0	0	0.000207566	0.000104818	0	0	0
976	Bacteria	Proteobacteria	Alphaproteobacteria	Rhizobiales	Beijerinckiaceae	0	0	0	0	0.000267742	0	0	0.000207566	0	0	0	0
977	Bacteria	Firmicutes	Clostridia	Lachnospirales	Lachnospiraceae	0	0	6.01359e-05	0	0	0	0	0.000207566	0	0	0	0
978	Bacteria	Planctomycetota	Phycisphaerae	CCM11a	CCM11a	0	0	0	0	0	0	0	0.000207566	0	0	0	0
979	Bacteria	Bacteroidota	Bacteroidia	Bacteroidales	Prevotellaceae	0	0	0	0	0	0	0	0.000207566	0	0	0	0
980	Bacteria	Proteobacteria	Gammaproteobacteria	Xanthomonadales	Xanthomonadaceae	0	0	0.00139782	0.000499226	0	0	0	0.000207566	0	0	0	0
981	Bacteria	Acidobacteriota	Vicinamibacteria	Subgroup_17	Subgroup_17	0	0	0	0	0	0	0	0.000207566	0	0	0	0
982	Bacteria	Bacteroidota	Bacteroidia	Cytophagales	Cytophagaceae	8.3875e-05	0	0.000279912	0	0.000405929	0	0	0.000207566	0	0	0	0
983	Bacteria	Bacteroidota	Bacteroidia	Sphingobacteriales	env.OPS_17	6.29063e-05	0	0	0	0	0	0	0.000207566	0	0	0	0
984	Bacteria	Myxococcota	Polyangia	FFCH16767	FFCH16767	0	0	0	0.000149768	0	0	0	0.000207566	0	0	0	0
985	Bacteria	Chloroflexi	TK10	TK10	TK10	0	0	0	0.000324497	0	0	0	0.000207566	0	0	0	0
986	Bacteria	Proteobacteria	Alphaproteobacteria	Rhizobiales	Xanthobacteraceae	0	0	0	0.00114822	0.000369528	0	0	0.000207566	0	0	0	0
987	Bacteria	Cyanobacteria	Cyanobacteriia	Cyanobacteriales	Chroococcidiopsaceae	0	0	0	0.000249613	0	0	0	0.000207566	0	0	0	0
988	Bacteria	Bacteroidota	Bacteroidia	Chitinophagales	Saprospiraceae	0.000286573	0	0.00206719	0	0.000883307	0.000985937	0.000605994	0.000207566	0	0	0	0
989	Bacteria	Firmicutes	Clostridia	Clostridiales	Clostridiaceae	0	0	0.00011359	0	0	0	0	0.000207566	0	0	0	0
990	Bacteria	Bacteroidota	Bacteroidia	Flavobacteriales	Flavobacteriaceae	0.000190694	0	0	0	0	0	0	0.000192816	0.000153233	0	0	0
991	Bacteria	Patescibacteria	Microgenomatia	Candidatus_Woesebacteria	Candidatus_Woesebacteria	0	0	0	0.000149768	0	0	0	0.000192816	4.8895e-05	0	0	0
992	Bacteria	Bacteroidota	Bacteroidia	Sphingobacteriales	Sphingobacteriaceae	0	0.00563559	0	0	0	0	0	0.000192816	0	0	0	0
993	Bacteria	Cyanobacteria	Cyanobacteriia	Chloroplast	Chloroplast	0	0	0	0	0	0	0	0.000192816	8.96408e-05	0	0.000168152	0
994	Bacteria	Proteobacteria	Gammaproteobacteria	Thiotrichales	Thiotrichaceae	0	0	0	0.000249613	0	0	0	0.000192816	0	0	0	0
995	Bacteria	Proteobacteria	Alphaproteobacteria	Rhodospirillales	uncultured	0	0	0.000240544	0	0	0	0	0.000192816	0.000150323	0	0	0
996	Bacteria	Verrucomicrobiota	Verrucomicrobiae	Chthoniobacterales	Chthoniobacteraceae	0	0	0	0.000224652	0	0	0	0.000192816	0	0	0	0
997	Bacteria	Proteobacteria	Alphaproteobacteria	Rickettsiales	SM2D12	1.39792e-05	0	0	0	0	0	0	0.000192816	0	0	0	0
998	Bacteria	Bacteroidota	Bacteroidia	Cytophagales	Cytophagaceae	0	0.000254877	0	0	0	0	0	0.000192816	0	0	0	0
999	Bacteria	Dependentiae	Babeliae	Babeliales	Babeliales	0	0	0	0	4.38842e-05	0	0	0.000192816	0	0	0	0
1000	Bacteria	Schekmanbacteria	Schekmanbacteria	Schekmanbacteria	Schekmanbacteria	0	0	0	0.000174729	0	0	0	0.000192816	0	0.00153438	0	0
1001	Bacteria	Firmicutes	Bacilli	Brevibacillales	Brevibacillaceae	0.000545188	0.00090036	0	0	0	0	0	0.000192816	0	0.000906682	0	0
1002	Bacteria	Gemmatimonadota	Gemmatimonadetes	Gemmatimonadales	Gemmatimonadaceae	0	0	0	0	0	0	0	0.000192816	0.000260773	0.000766284	0	0.00527808
1003	Bacteria	Bacteroidota	Bacteroidia	Chitinophagales	Saprospiraceae	0	0	9.69735e-05	0	0	0	0	0.000192816	0	0.000697447	0	0
1004	Bacteria	Proteobacteria	Alphaproteobacteria	Sphingomonadales	Sphingomonadaceae	0	0	0.000962342	0	0	0	0	0.000192816	0.000162983	0	0	0
1005	Bacteria	Verrucomicrobiota	Chlamydiae	Chlamydiales	Parachlamydiaceae	0	0	1.76316e-05	0	0	0	0	0.000192816	4.8895e-05	0	0	0
1006	Bacteria	Verrucomicrobiota	Omnitrophia	Omnitrophales	Omnitrophaceae	6.29063e-05	0	0	0	0	0	0	0.000192816	0	0	0	0
1007	Bacteria	Proteobacteria	Alphaproteobacteria	Rhizobiales	Methyloligellaceae	0	0	0	0	0	0	0	0.000192816	0	0	0	0
1008	Bacteria	Acidobacteriota	Aminicenantia	Aminicenantales	Aminicenantales	0	0	0	0	0	0	0	0.000192816	0	0	0	0
1009	Bacteria	Gemmatimonadota	Gemmatimonadetes	Gemmatimonadales	Gemmatimonadaceae	0	0	0	0	0	0.000518914	0	0.000192816	0	0	0	0
1010	Bacteria	Bacteroidota	Bacteroidia	Cytophagales	Microscillaceae	9.55384e-05	0	0	0	0	0	0	0.000192816	0	0	0	0
1011	Bacteria	Campilobacterota	Campylobacteria	Campylobacterales	Arcobacteraceae	0	0	0	0	0	0	0	0.000192816	0	0	0	0
1012	Bacteria	Actinobacteriota	Acidimicrobiia	Actinomarinales	uncultured	0	0	0	0	0	0	0	0.000192816	0	0	0	0
1013	Bacteria	Firmicutes	Desulfitobacteriia	Desulfitobacteriales	Ambiguous_taxa	0	0	3.34088e-05	0	0	0	0	0.000192816	0	0	0	0
1014	Bacteria	Proteobacteria	Gammaproteobacteria	Burkholderiales	Oxalobacteraceae	0	0	0.000617351	0	0	0	0	0.000192816	0	0	0	0
1015	Bacteria	Proteobacteria	Gammaproteobacteria	Diplorickettsiales	Diplorickettsiaceae	0	0	0	0	0	0	0	0.000192816	0	0	0	0
1016	Bacteria	Proteobacteria	Alphaproteobacteria	Rhodospirillales	Magnetospiraceae	0	0	0	0.000124807	0	0	0	0.000192816	0	0	0	0
1017	Bacteria	Bdellovibrionota	Bdellovibrionia	Bdellovibrionales	Bdellovibrionaceae	0	0	5.28947e-05	0	0	0	0	0.000192816	0	0	0	0
1018	Bacteria	Verrucomicrobiota	Verrucomicrobiae	Methylacidiphilales	Methylacidiphilaceae	0	0	5.44722e-05	0	0	0	0	0.000192816	0	0	0	0
1019	Bacteria	Bacteroidota	Bacteroidia	Sphingobacteriales	KD3-93	0.00034249	0	0.000595588	0	0	0	0	0.000192816	0	0	0	0
1020	Bacteria	Proteobacteria	Alphaproteobacteria	Micavibrionales	uncultured	0	0	0	0.000149768	0	0	0	0.000192816	0	0	0	0
1021	Bacteria	Proteobacteria	Alphaproteobacteria	Rhizobiales	Beijerinckiaceae	0.000125813	0	0.000253907	0	0	0	0	0.000192816	0	0	0	0
1022	Bacteria	Bacteroidota	Bacteroidia	Flavobacteriales	Flavobacteriaceae	0	0	0	0	0	0.000882155	0.00154253	0.000192816	0	0	0	0
1023	Bacteria	Cyanobacteria	Cyanobacteriia	Chloroplast	Chloroplast	0	0	0.000352631	0	0	0	0	0.000192816	0	0	0	0
1024	Bacteria	Proteobacteria	Alphaproteobacteria	uncultured	uncultured	0	0	0	0	0.00452299	0	0	0.000192816	0	0	0	0
1025	Bacteria	Cyanobacteria	Cyanobacteriia	Leptolyngbyales	Leptolyngbyaceae	0.000227183	0	0.000127102	0	0.000219421	0.000467023	0	0.000188018	3.49394e-05	0	0	0
1026	Bacteria	Proteobacteria	Gammaproteobacteria	Burkholderiales	TRA3-20	0	0	0.000273289	0.00124807	0.000638039	0	0.00159762	0.000188018	0	0	0	0
1027	Bacteria	Verrucomicrobiota	Omnitrophia	Omnitrophales	Omnitrophaceae	0.00017474	0	0	0	0	0	0	0.00018162	0.000104818	0	0	0
1028	Bacteria	Acidobacteriota	Acidobacteriae	Subgroup_2	Subgroup_2	0	5.09753e-05	0	0	0	0	0	0.00018162	0	0	0	0
1029	Archaea	Crenarchaeota	Nitrososphaeria	Nitrosopumilales	Nitrosopumilaceae	0	0	0	0	0	0	0	0.00018162	0	0	0	0
1030	Archaea	Nanoarchaeota	Nanoarchaeia	Woesearchaeales	SCGC_AAA011-D5	1.39792e-05	0	0	0	0	0	0	0.00018162	0	0	0	0
1031	Bacteria	Bdellovibrionota	Bdellovibrionia	Bdellovibrionales	Bdellovibrionaceae	0	0	3.34088e-05	0	0	0	0	0.00018162	0.00016305	0	0	0
1032	Bacteria	Firmicutes	Bacilli	Paenibacillales	Paenibacillaceae	0	0.000169918	0	0	0	0	0	0.00018162	0.000102155	0	0	0
1033	Bacteria	Proteobacteria	Alphaproteobacteria	Rhodospirillales	uncultured	0	0	0	0	6.58263e-05	0	0	0.00018162	0	0	0	0
1034	Bacteria	Patescibacteria	Parcubacteria	Parcubacteria	Parcubacteria	0	0	0	7.48839e-05	0	0	0	0.00018162	9.77899e-05	0	0.000531109	0
1035	Bacteria	Patescibacteria	Parcubacteria	Candidatus_Azambacteria	Candidatus_Azambacteria	0	0	0	0	2.93015e-05	0	0	0.00018162	0	0	0	0
1036	Bacteria	Bacteroidota	Bacteroidia	Chitinophagales	Chitinophagaceae	0	0	0	0	0	0	0	0.00018162	0.00349577	0	0	0
1037	Bacteria	Proteobacteria	Gammaproteobacteria	Burkholderiales	Hydrogenophilaceae	0.000795697	0.00465664	0.00101308	0.0023214	0.00127298	0.00332105	0.0130013	0.00018162	0	0.00105364	0	0
1038	Bacteria	Bacteroidota	Kapabacteria	Kapabacteriales	Kapabacteriales	1.39792e-05	0	0	0	0	0	0	0.00018162	0.000248039	0	0	0.000106918
1039	Bacteria	Bacteroidota	Bacteroidia	Bacteroidales	Marinilabiliaceae	0	0	0	0	0	0	0	0.00018162	0.000187285	0	0	0
1040	Bacteria	Myxococcota	bacteriap25	bacteriap25	bacteriap25	0	0	0	0	0	0	0	0.00018162	0	0	0	0
1041	Bacteria	Sva0485	Sva0485	Sva0485	Sva0485	0	0	0	0	0	0	0	0.00018162	0	0	0	0
1042	Bacteria	Bacteroidota	Bacteroidia	Flavobacteriales	Flavobacteriaceae	0.000163452	0	0	0	0	0	0	0.00018162	0	0	0	0
1043	Bacteria	Patescibacteria	Gracilibacteria	JGI_0000069-P22	JGI_0000069-P22	0	0	0	0	0	0	0	0.00018162	0	0	0	0
1044	Bacteria	Proteobacteria	Gammaproteobacteria	Burkholderiales	SC-I-84	0	0	6.01359e-05	0	0	0	0	0.00018162	0	0	0	0
1045	Bacteria	Bacteroidota	Bacteroidia	Cytophagales	Cytophagaceae	0	0	0.000127102	0	0	0.00036324	0.000275452	0.00018162	0	0	0	0
1046	Bacteria	Verrucomicrobiota	Omnitrophia	Omnitrophales	Omnitrophaceae	0	0	0	0	0	0	0	0.00018162	0	0	0	0
1047	Bacteria	Desulfobacterota	Desulfobacteria	Desulfatiglandales	Desulfatiglandaceae	0.000108968	0.000679671	0	0	0	0	0	0.00018162	0	0	0	0
1048	Bacteria	Cyanobacteria	Cyanobacteriia	Leptolyngbyales	Leptolyngbyaceae	0	0.000166733	0	0	0	0	0	0.00018162	0	0	0	0
1049	Bacteria	Proteobacteria	Alphaproteobacteria	Rickettsiales	Mitochondria	0	0	0	0.00019969	0	0	0	0.00018162	0	0	0	0
1050	Bacteria	Cyanobacteria	Vampirivibrionia	Vampirovibrionales	Vampirovibrionaceae	0	0	0	0	0	0	0	0.00018162	0	0	0	0
1051	Bacteria	Proteobacteria	Gammaproteobacteria	Burkholderiales	Hydrogenophilaceae	0.000286573	0	0	0.000648994	0.00108613	0	0.00264434	0.00018162	0	0	0	0
1052	Bacteria	Planctomycetota	Phycisphaerae	Pla1_lineage	Pla1_lineage	0	0	0	0	0	0	0	0.00018162	0	0	0	0
1053	Bacteria	PAUC34f	PAUC34f	PAUC34f	PAUC34f	0	0.000101951	0	0	0	0	0	0.00018162	0	0	0	0
1054	Bacteria	Firmicutes	TSAC18	TSAC18	TSAC18	0	0	0	0.000149768	0	0	0	0.00018162	0	0	0	0
1055	Bacteria	Desulfobacterota	Desulfovibrionia	Desulfovibrionales	Desulfovibrionaceae	0	0	0.000105789	0	0	0	0	0.00018162	0	0	0	0
1056	Bacteria	Proteobacteria	Gammaproteobacteria	Coxiellales	Coxiellaceae	0	0	0	0	0	0	0	0.00018162	0	0	0	0
1057	Bacteria	Proteobacteria	Gammaproteobacteria	Burkholderiales	Sulfuricellaceae	0	0	0	0.000748839	0	0	0	0.00018162	0	0	0	0
1058	Bacteria	Proteobacteria	Gammaproteobacteria	Burkholderiales	Burkholderiaceae	0	0	0	0.000673955	0	0	0	0.00018162	0	0	0	0
1059	Bacteria	Campilobacterota	Campylobacteria	Campylobacterales	Sulfurimonadaceae	0	0	0	0	0	0	0	0.000165271	0	0	0	0
1060	Archaea	Nanoarchaeota	Nanoarchaeia	Woesearchaeales	SCGC_AAA011-D5	2.09688e-05	0	0	0	0	0	0	0.000165271	0	0	0	0
1061	Bacteria	Actinobacteriota	Actinobacteria	Corynebacteriales	Nocardiaceae	0	0	0	0	0	0	0	0.000165271	0	0	0	0
1062	Bacteria	Bdellovibrionota	Oligoflexia	Oligoflexales	uncultured	0	0	0	0	4.39522e-05	0	0	0.000165271	0	0	0	0
1063	Bacteria	Cyanobacteria	Cyanobacteriia	Cyanobacteriales	Xenococcaceae	0	0	0	0.000174729	0	0	0	0.000165271	0	0	0	0
1064	Bacteria	Bacteroidota	Bacteroidia	Chitinophagales	Saprospiraceae	0	0	0	0	8.79044e-05	0.00072648	0.000440723	0.000165271	0	0	0	0
1065	Bacteria	Cloacimonadota	Cloacimonadia	Cloacimonadales	MSBL8	0	0	0	0	0	0	0	0.000165271	0	0	0	0
1066	Bacteria	Bdellovibrionota	Bdellovibrionia	Bacteriovoracales	Bacteriovoracaceae	0	0	5.34541e-05	0	0	0	0	0.000165271	0	0.00172414	0	0
1067	Bacteria	Proteobacteria	Alphaproteobacteria	Rhizobiales	Beijerinckiaceae	0	0	0	0	0	0	0	0.000165271	0.000151404	0.000688161	0	0
1068	Bacteria	Verrucomicrobiota	Verrucomicrobiae	Chthoniobacterales	Chthoniobacteraceae	0	0	0	0	0	0	0	0.000165271	0	0.000348724	0	0
1069	Bacteria	Firmicutes	Bacilli	Brevibacillales	Brevibacillaceae	0	0	0.000621997	0	0	0	0	0.000165271	0	0	0.000308279	0.000748423
1070	Bacteria	Proteobacteria	Alphaproteobacteria	Rhizobiales	Hyphomicrobiaceae	0	0	0	0.000399381	0	0	0	0.000165271	0.000186877	0	0.000112101	0.000213835
1071	Bacteria	Firmicutes	Negativicutes	Veillonellales-Selenomonadales	Sporomusaceae	0	0	0	0	0	0	0	0.000165271	0.000373628	0	0	0
1072	Bacteria	Patescibacteria	Parcubacteria	Candidatus_Lloydbacteria	Candidatus_Lloydbacteria	0	0.00018691	0	0	0	0	0	0.000165271	0.000287611	0	0.000323669	0
1073	Bacteria	Bdellovibrionota	Bdellovibrionia	Bdellovibrionales	Bdellovibrionaceae	0	0	8.01812e-05	0	0	0	0	0.000165271	0	0	0	0
1074	Bacteria	Bacteroidota	Bacteroidia	Cytophagales	Microscillaceae	0	0	0	7.48839e-05	0	0	0	0.000165271	0	0	0	0
1075	Bacteria	Proteobacteria	Alphaproteobacteria	Acetobacterales	Acetobacteraceae	0	0	0	0	0	0	0	0.000165271	0	0	0	0
1076	Bacteria	Bacteroidota	Bacteroidia	Sphingobacteriales	env.OPS_17	0.000496261	0	0.000599194	0	0	0	0	0.000165271	0	0	0	0
1077	Bacteria	Proteobacteria	Alphaproteobacteria	Kiloniellales	Kiloniellaceae	0	0	0	0	0	0	0	0.000165271	0	0	0	0
1078	Bacteria	Proteobacteria	Alphaproteobacteria	Rhizobiales	Xanthobacteraceae	0	0.000424794	0	0	0	0	0	0.000165271	0	0	0	0
1079	Bacteria	Proteobacteria	Alphaproteobacteria	Rhodospirillales	uncultured	9.08646e-05	0	0	0	0	0	0	0.000165271	0	0	0	0
1080	Bacteria	Chloroflexi	Anaerolineae	SBR1031	A4b	0	0	9.69735e-05	4.99226e-05	0	0	0	0.000165271	0	0	0	0
1081	Bacteria	Planctomycetota	Planctomycetes	Gemmatales	Gemmataceae	0	0	0	0	0	0.000311349	0	0.000165271	0	0	0	0
1082	Bacteria	Proteobacteria	Gammaproteobacteria	Burkholderiales	Comamonadaceae	0	0	0	0	0.000366268	0	0	0.000165271	0	0	0	0
1083	Bacteria	Proteobacteria	Alphaproteobacteria	Caulobacterales	Hyphomonadaceae	0	0	0	0	0	0.000207566	0	0.000165271	0	0	0	0
1084	Bacteria	Patescibacteria	Parcubacteria	Candidatus_Portnoybacteria	Candidatus_Portnoybacteria	0	0	0.000141052	0	0	0	0	0.000165271	0	0	0	0
1085	Bacteria	Bacteroidota	Bacteroidia	Chitinophagales	Saprospiraceae	0	0	0.000132237	0	0.00203363	0	0	0.000165271	0	0	0	0
1086	Bacteria	Proteobacteria	Gammaproteobacteria	Coxiellales	Coxiellaceae	0	0	0	0	0	0	0.000495813	0.000165271	0	0	0	0
1087	Bacteria	Dependentiae	Babeliae	Babeliales	Babeliales	0	0	6.17104e-05	0	0	0	0	0.000165271	0	0	0	0
1088	Bacteria	Bdellovibrionota	Bdellovibrionia	Bdellovibrionales	Bdellovibrionaceae	0	0	0	0	0	0	0	0.000165271	0	0	0	0
1089	Bacteria	Bacteroidota	Bacteroidia	Sphingobacteriales	Lentimicrobiaceae	0	0	0	0.000698917	0	0	0	0.000165271	0	0	0	0
1090	Bacteria	Chloroflexi	Anaerolineae	RBG-13-54-9	RBG-13-54-9	0	0	0	0	0	0	0	0.000165271	0	0	0	0
1091	Bacteria	Bdellovibrionota	Bdellovibrionia	Bdellovibrionales	Bdellovibrionaceae	0	0	0	0	0	0	0	0.000165271	0	0	0	0
1092	Bacteria	Planctomycetota	Planctomycetes	Pirellulales	Pirellulaceae	0	0	0	0	0	0	0.000220361	0.000165271	0	0	0	0
1093	Bacteria	Patescibacteria	Parcubacteria	Candidatus_Nomurabacteria	Candidatus_Nomurabacteria	0	0	0	0	0	0	0	0.000165271	0	0	0	0
1094	Bacteria	Proteobacteria	Alphaproteobacteria	Kiloniellales	Kiloniellaceae	0	0.000985523	0	0	0	0	0	0.000165271	0	0	0	0
1095	Bacteria	Verrucomicrobiota	Verrucomicrobiae	Verrucomicrobiales	Rubritaleaceae	0	0	0.000365259	0	0	0	0.000991626	0.000165271	0	0	0	0
1096	Bacteria	Bacteroidota	Bacteroidia	Sphingobacteriales	Lentimicrobiaceae	0	0.000356827	0	0.000599071	0	0	0	0.000165271	0	0	0	0
1097	Bacteria	Proteobacteria	Alphaproteobacteria	Micavibrionales	uncultured	0	0	0	0	0	0	0	0.000165271	0	0	0	0
1098	Bacteria	Bdellovibrionota	Oligoflexia	Silvanigrellales	Silvanigrellaceae	3.49479e-05	0	0	0	0	0	0	0.000165271	0	0	0	0
1099	Bacteria	Proteobacteria	Alphaproteobacteria	Sphingomonadales	Sphingomonadaceae	0	0	0	0.000599071	0	0	0	0.000160473	0	0	0	0
1100	Bacteria	Bacteroidota	Bacteroidia	Chitinophagales	Saprospiraceae	0	0	0	0	0.000556728	0	0	0.000155674	0.000637011	0	0.00407362	0.000384586
1101	Bacteria	Patescibacteria	Microgenomatia	Candidatus_Woesebacteria	Candidatus_Woesebacteria	0	0	0	0	0	0	0	0.000155674	0.00363734	0.000278979	0.0017824	0.000160376
1102	Bacteria	Proteobacteria	Gammaproteobacteria	Burkholderiales	Nitrosomonadaceae	0	0	0	0.000748839	0	0	0	0.000155674	0.000137982	0	0	0
1103	Bacteria	Bacteroidota	Bacteroidia	Chitinophagales	Chitinophagaceae	0	0	0.000257056	0	0	0	0	0.000155674	0.000600564	0	0	0
1104	Bacteria	Margulisbacteria	Margulisbacteria	Margulisbacteria	Margulisbacteria	0	0	0	0	0	0	0	0.000155674	0.000840414	0	0	0
1105	Bacteria	Patescibacteria	Gracilibacteria	Absconditabacteriales_(SR1)	Absconditabacteriales_(SR1)	0	0	4.00906e-05	0	0	0	0	0.000155674	0	0	0	0
1106	Bacteria	Cyanobacteria	Cyanobacteriia	Chloroplast	Chloroplast	0	0	0.000714078	0.000624033	0	0	0	0.000155674	0.000683645	0	0	0
1107	Bacteria	Proteobacteria	Alphaproteobacteria	Rickettsiales	Mitochondria	0.000153771	0	0	0	0	0	0	0.000155674	0.000125148	0	0	0
1108	Bacteria	Actinobacteriota	Actinobacteria	Streptosporangiales	Thermomonosporaceae	0	0	0	0.000224652	0	0	0	0.000155674	4.07458e-05	0	0.00130731	0
1109	Bacteria	Cyanobacteria	Cyanobacteriia	Chloroplast	Chloroplast	1.39792e-05	0	0	0	0	0	0	0.000155674	0	0	0	0
1110	Bacteria	Firmicutes	Clostridia	Clostridiales	Clostridiaceae	0	0	6.01359e-05	0	0	0	0	0.000155674	0	0	0	0
1111	Bacteria	Proteobacteria	Gammaproteobacteria	Steroidobacterales	Woeseiaceae	0	0.00100251	0	0	0	0	0	0.000155674	0	0	0	0
1112	Bacteria	Proteobacteria	Alphaproteobacteria	Rhodobacterales	Rhodobacteraceae	0	0	0	0	0	0	0	0.000155674	0	0	0	0
1113	Bacteria	Bacteroidota	Bacteroidia	Chitinophagales	Saprospiraceae	0	0	0.000516828	0	0	0	0	0.000155674	0	0	0	0
1114	Bacteria	Verrucomicrobiota	Omnitrophia	Omnitrophales	Omnitrophaceae	0	0	0.000140317	0	0	0	0	0.000155674	0	0	0	0
1115	Bacteria	Proteobacteria	Gammaproteobacteria	Burkholderiales	Sulfuricellaceae	0	0	0	0	0	0	0	0.000155674	0	0	0	0
1116	Bacteria	Proteobacteria	Gammaproteobacteria	Diplorickettsiales	Diplorickettsiaceae	0	0	0	0	0	0	0	0.000155674	0	0	0	0
1117	Archaea	Nanoarchaeota	Nanoarchaeia	Woesearchaeales	Woesearchaeales	0	3.39836e-05	0	0	0	0	0	0.000155674	0	0	0	0
1118	Bacteria	Bacteroidota	Rhodothermia	Rhodothermales	Rhodothermaceae	0	0	0	9.98452e-05	0	0	0	0.000155674	0	0	0	0
1119	Archaea	Nanoarchaeota	Nanoarchaeia	Woesearchaeales	Woesearchaeales	0	0	0	7.48839e-05	0	0	0	0.000155674	0	0	0	0
1120	Archaea	Halobacterota	ANME-1	ANME-1a	ANME-1a	0	0.000526745	0	0	0	0	0	0.000155674	0	0	0	0
1121	Bacteria	Cyanobacteria	Cyanobacteriia	Cyanobacteriales	Nostocaceae	0	0	0	0	0	0	0.000385632	0.000155674	0	0	0	0
1122	Bacteria	Actinobacteriota	Thermoleophilia	Solirubrobacterales	Solirubrobacteraceae	0	0	0	0.000324497	0	0	0	0.000155674	0	0	0	0
1123	Bacteria	Planctomycetota	Planctomycetes	Pirellulales	Pirellulaceae	0	0	0	0	5.86029e-05	0	0	0.000155674	0	0	0	0
1124	Bacteria	Cyanobacteria	Cyanobacteriia	Cyanobacteriales	Nostocaceae	0	0	0.00011359	0	0	0	0	0.000155674	0	0	0	0
1125	Bacteria	Bacteroidota	Bacteroidia	Bacteroidales	Williamwhitmaniaceae	0	0	0	0	0	0	0	0.000155674	0	0	0	0
1126	Bacteria	Hydrogenedentes	Hydrogenedentia	Hydrogenedentiales	Hydrogenedensaceae	0	0	0	0	0	0	0	0.000155674	0	0	0	0
1127	Bacteria	Patescibacteria	Parcubacteria	Candidatus_Nomurabacteria	Candidatus_Nomurabacteria	0	0	0	0	0	0	0	0.000155674	0	0	0	0
1128	Bacteria	Proteobacteria	Alphaproteobacteria	Rhodobacterales	Rhodobacteraceae	0.000391417	0	0	0	0	0	0	0.000155674	0	0	0	0
1129	Bacteria	Bacteroidota	Kapabacteria	Kapabacteriales	Kapabacteriales	0	0	4.67724e-05	0	0	0	0	0.000155674	0	0	0	0
1130	Bacteria	Proteobacteria	Gammaproteobacteria	Ambiguous_taxa	Ambiguous_taxa	0	0.00047577	0	0	0	0	0	0.000155674	0	0	0	0
1131	Bacteria	Bacteroidota	Bacteroidia	Flavobacteriales	Flavobacteriaceae	0	0	0.000307361	0	0	0	0	0.000155674	0	0	0	0
1132	Bacteria	Firmicutes	Clostridia	Clostridia	Hungateiclostridiaceae	0	0	0.000200453	0	0	0	0	0.000155674	0	0	0	0
1133	Bacteria	Bdellovibrionota	Bdellovibrionia	Bdellovibrionales	Bdellovibrionaceae	0	0	0	0	0	0	0	0.000155674	0	0	0	0
1134	Bacteria	Proteobacteria	Alphaproteobacteria	Rhodospirillales	uncultured	0	0	4.00906e-05	0	0	0	0	0.000137726	2.32929e-05	0.000627703	0	0
1135	Bacteria	Actinobacteriota	Acidimicrobiia	Microtrichales	Iamiaceae	2.79583e-05	0	0	0	0	0	0	0.000137726	0	0	0	0
1136	Bacteria	Proteobacteria	Gammaproteobacteria	Nitrosococcales	Nitrosococcaceae	0.000238846	0	0.000253068	0	0	0	0	0.000137726	0	0	0	0
1137	Bacteria	Patescibacteria	Parcubacteria	Parcubacteria	Parcubacteria	0	0	0	0	0	0.000415132	0	0.000137726	0.000104818	0.00213423	0.000550943	0.000999923
1138	Bacteria	Bacteroidota	Bacteroidia	Cytophagales	Spirosomaceae	0	0	0	0	0	0	0	0.000137726	0	0	0	0
1139	Bacteria	Proteobacteria	Gammaproteobacteria	Cellvibrionales	Porticoccaceae	0	0	0	0	0	0	0	0.000137726	0	0	0	0
1140	Bacteria	Bdellovibrionota	Bdellovibrionia	Bdellovibrionales	Bdellovibrionaceae	0	0	0	0	5.86029e-05	0	0	0.000137726	0.000116465	0	0	0
1141	Bacteria	Firmicutes	Bacilli	Bacillales	Bacillaceae	0	0.000203901	0	0.000823723	0	0	0	0.000137726	0	0	0	0
1142	Bacteria	Bacteroidota	Bacteroidia	Bacteroidetes_VC2.1_Bac22	Bacteroidetes_VC2.1_Bac22	0	0	0	0	0	0	0	0.000137726	5.10777e-05	0	0	0
1143	Bacteria	Firmicutes	Clostridia	Clostridiales	Clostridiaceae	0	0	0.000120272	0	0	0	0	0.000137726	0	0.000209234	0	0
1144	Bacteria	Actinobacteriota	Thermoleophilia	Gaiellales	Gaiellaceae	0	0	6.17104e-05	0	0	0	0	0.000137726	0	0	0.00119234	0.00112263
1145	Archaea	Aenigmarchaeota	Aenigmarchaeia	Aenigmarchaeales	Aenigmarchaeales	0	0	4.00906e-05	0	0	0	0	0.000137726	0	0	0.000796031	0.000267294
1146	Bacteria	Bacteroidota	Bacteroidia	Cytophagales	Flammeovirgaceae	0	0	0	0	0	0	0.000110181	0.000137726	0.000102155	0	0	0
1147	Bacteria	Verrucomicrobiota	Verrucomicrobiae	Pedosphaerales	Pedosphaeraceae	0	0	0	0.000174729	0	0	0	0.000137726	5.70441e-05	0	0	0
1148	Bacteria	Armatimonadota	Fimbriimonadia	Fimbriimonadales	Fimbriimonadales	0	0	0	0	0	0	0.000661084	0.000137726	0	0	0	0
1149	Bacteria	Proteobacteria	Gammaproteobacteria	Burkholderiales	Aquaspirillaceae	0	0.000333467	0	0	0.000487246	0	0	0.000137726	0	0	0	0
1150	Bacteria	Patescibacteria	Parcubacteria	Candidatus_Kaiserbacteria	Candidatus_Kaiserbacteria	0	0	0	0	0	0	0	0.000137726	0	0	0	0
1151	Bacteria	Myxococcota	Polyangia	VHS-B4-70	VHS-B4-70	0	8.49589e-05	0	0	0	0	0	0.000137726	0	0	0	0
1152	Bacteria	Cyanobacteria	Vampirivibrionia	Obscuribacterales	Obscuribacteraceae	0	0	0	0	0	0	0	0.000137726	0	0	0	0
1153	Bacteria	Planctomycetota	Phycisphaerae	Phycisphaerales	Phycisphaeraceae	0	0	7.26296e-05	0	0	0	0	0.000137726	0	0	0	0
1154	Bacteria	Proteobacteria	Gammaproteobacteria	Xanthomonadales	Xanthomonadaceae	0	0	0	0	0	0	0	0.000137726	0	0	0	0
1155	Bacteria	Proteobacteria	Gammaproteobacteria	Burkholderiales	Comamonadaceae	0	0	0	0	0.000454173	0	0	0.000137726	0	0	0	0
1156	Bacteria	Verrucomicrobiota	Verrucomicrobiae	Verrucomicrobiales	Rubritaleaceae	0	0	0.000360815	0	0	0	0	0.000137726	0	0	0	0
1157	Bacteria	Verrucomicrobiota	Lentisphaeria	SS1-B-02-17	SS1-B-02-17	0	0	9.07869e-05	0	0	0	0	0.000137726	0	0	0	0
1158	Bacteria	Proteobacteria	Gammaproteobacteria	Legionellales	Legionellaceae	0	0	0	0	0	0	0	0.000137726	0	0	0	0
1159	Bacteria	Proteobacteria	Alphaproteobacteria	Sphingomonadales	Sphingomonadaceae	0	0	0	0	0.000777953	0	0	0.000137726	0	0	0	0
1160	Bacteria	Planctomycetota	Phycisphaerae	Phycisphaerales	Phycisphaeraceae	0	0	0	0	0	0	0	0.000137726	0	0	0	0
1161	Bacteria	Verrucomicrobiota	Kiritimatiellae	WCHB1-41	WCHB1-41	0	0	0	4.99226e-05	0	0	0	0.000137726	0	0	0	0
1162	Bacteria	Elusimicrobiota	Endomicrobia	Endomicrobiales	Endomicrobiaceae	0	0	2.64473e-05	0	0	0	0	0.000137726	0	0	0	0
1163	Bacteria	Proteobacteria	Gammaproteobacteria	Xanthomonadales	Rhodanobacteraceae	0	0	0	0.000324497	0	0	0	0.000137726	0	0	0	0
1164	Bacteria	Proteobacteria	Alphaproteobacteria	Rhodospirillales	Magnetospirillaceae	0	0	0	4.99226e-05	0	0	0	0.000137726	0	0	0	0
1165	Bacteria	Proteobacteria	Alphaproteobacteria	Rickettsiales	Mitochondria	0	0	0.0034966	0.000324497	0	0	0	0.000137726	0	0	0	0
1166	Bacteria	Cyanobacteria	Vampirivibrionia	Caenarcaniphilales	Caenarcaniphilales	0	0	0	0	4.38842e-05	0	0	0.000137726	0	0	0	0
1167	Archaea	Crenarchaeota	Bathyarchaeia	Bathyarchaeia	Bathyarchaeia	0	0	0	0	0	0	0	0.000137726	0	0	0	0
1168	Bacteria	Acidobacteriota	Thermoanaerobaculia	Thermoanaerobaculales	Thermoanaerobaculaceae	0	0	9.07869e-05	0	0	0	0	0.000137726	0	0	0	0
1169	Bacteria	Patescibacteria	Microgenomatia	Candidatus_Woesebacteria	Candidatus_Woesebacteria	0	0	0	0.000174729	0	0	0	0.000137726	0	0	0	0
1170	Bacteria	Firmicutes	Bacilli	Erysipelotrichales	Erysipelotrichaceae	0.00016076	0.00125739	0	0	0	0	0	0.000137726	0	0	0	0
1171	Bacteria	Bacteroidota	Bacteroidia	Chitinophagales	Chitinophagaceae	7.68854e-05	0	0	0	0	0	0	0.000137726	0	0	0	0
1172	Bacteria	Firmicutes	Bacilli	Bacillales	Bacillaceae	0.000111833	0	0	0	0	0.0139588	0	0.000137726	0	0	0	0
1173	Bacteria	Fibrobacterota	Chitinivibrionia	uncultured	uncultured	0	0	0	0	0	0	0	0.000137726	0	0	0	0
1174	Bacteria	Bacteroidota	Rhodothermia	Rhodothermales	Rhodothermaceae	0	0	0	0	0.000175809	0	0	0.000137726	0	0	0	0
1175	Bacteria	Bacteroidota	Bacteroidia	Chitinophagales	Saprospiraceae	0	0	0.00107023	0.000524188	0	0	0	0.000137726	0	0	0	0
1176	Bacteria	Verrucomicrobiota	Omnitrophia	Omnitrophales	Omnitrophaceae	0	0	0	0	0	0	0	0.000137726	0	0	0	0
1177	Bacteria	Proteobacteria	Gammaproteobacteria	Burkholderiales	Comamonadaceae	0	0	0	0.00114822	0	0	0	0.000137726	0	0	0	0
1178	Bacteria	SAR324_clade(Marine_group_B)	SAR324_clade(Marine_group_B)	SAR324_clade(Marine_group_B)	SAR324_clade(Marine_group_B)	0	0	0	0	0	0	0	0.000137726	0	0	0	0
1179	Bacteria	Firmicutes	Bacilli	Bacillales	Bacillaceae	0	0	0	0	0	0	0.0011569	0.000129729	0	0	0	0
1180	Bacteria	Cyanobacteria	Cyanobacteriia	Cyanobacteriales	Phormidiaceae	0	0	0	0	8.79044e-05	0	0	0.000129729	0	0	0	0
1181	Bacteria	Bdellovibrionota	Oligoflexia	Oligoflexales	uncultured	0	0	0	0	0	0	0	0.000129729	0.000538508	0	0	0
1182	Bacteria	Armatimonadota	Armatimonadia	Armatimonadales	Armatimonadaceae	0	0	5.34541e-05	0	0	0	0	0.000129729	0.00363641	0.000383142	0	0
1183	Bacteria	Firmicutes	Clostridia	Oscillospirales	Oscillospiraceae	0	0	3.34088e-05	0	0	0	0	0.000129729	0	0	0	0
1184	Bacteria	Firmicutes	Clostridia	Clostridia	Hungateiclostridiaceae	0	0	7.9342e-05	0	0	0	0	0.000129729	0.000171132	0	0	0
1185	Bacteria	Cyanobacteria	Cyanobacteriia	Chloroplast	Chloroplast	0.00162458	0.00173403	0	0	0.000998483	0.00191998	0	0.000129729	0	0	0	0.000694964
1186	Bacteria	Deferrisomatota	Defferrisomatia	Defferrisomatales	Defferrisomataceae	6.29063e-05	0	0	0	0	0	0	0.000129729	0	0	0	0.000588047
1187	Bacteria	Proteobacteria	Gammaproteobacteria	Gammaproteobacteria_Incertae_Sedis	Unknown_Family	0	0	0	0	0.000164566	0	0	0.000129729	0.000581136	0	0	0
1188	Bacteria	Proteobacteria	Gammaproteobacteria	Coxiellales	Coxiellaceae	0	0	0	0	0	0	0	0.000129729	0.000518732	0	0	0
1189	Bacteria	Patescibacteria	Parcubacteria	Candidatus_Kaiserbacteria	Candidatus_Kaiserbacteria	2.09688e-05	0	0	0	0	0	0	0.000129729	0.000153233	0	0	0
1190	Bacteria	Campilobacterota	Campylobacteria	Campylobacterales	Sulfurovaceae	0	0	8.6863e-05	0	0	0	0	0.000129729	4.65858e-05	0	0	0
1191	Bacteria	Proteobacteria	Alphaproteobacteria	Rickettsiales	SM2D12	0	0	0.000123421	0	0	0	0	0.000129729	0	0	0	0
1192	Bacteria	Nitrospirota	Thermodesulfovibrionia	uncultured	uncultured	0	0	0	0.000149768	0	0	0	0.000129729	0	0	0	0
1193	Bacteria	Verrucomicrobiota	Verrucomicrobiae	Verrucomicrobiales	Verrucomicrobiaceae	0	0	0.000110897	0	0	0	0	0.000129729	0	0	0	0
1194	Archaea	Nanoarchaeota	Nanoarchaeia	Woesearchaeales	Woesearchaeales	0	0	0	0	2.93015e-05	0	0	0.000129729	0	0	0	0
1195	Bacteria	Acidobacteriota	Acidobacteriae	Acidobacteriales	uncultured	0	0	0	0	0	0	0	0.000129729	0	0	0	0
1196	Bacteria	Desulfobacterota	Desulfovibrionia	Desulfovibrionales	Desulfovibrionaceae	0	0	2.64473e-05	0	0	0	0	0.000129729	0	0	0	0
1197	Bacteria	Verrucomicrobiota	Verrucomicrobiae	Verrucomicrobiales	Verrucomicrobiaceae	0	0	6.17104e-05	0	0	0	0	0.000129729	0	0	0	0
1198	Bacteria	Bacteroidota	Bacteroidia	Cytophagales	Amoebophilaceae	0	0	8.81578e-05	0.00019969	0	0	0	0.000129729	0	0	0	0
1199	Bacteria	Proteobacteria	Gammaproteobacteria	R7C24	R7C24	0	0	0	0	0	0	0	0.000129729	0	0	0	0
1200	Bacteria	Bdellovibrionota	Bdellovibrionia	Bacteriovoracales	Bacteriovoracaceae	0	0	0.000606538	0	0	0	0	0.000129729	0	0	0	0
1201	Bacteria	Desulfobacterota	Desulfomonilia	Desulfomonilales	Desulfomonilaceae	0	0	7.34994e-05	0	0	0	0	0.000129729	0	0	0	0
1202	Bacteria	Proteobacteria	Gammaproteobacteria	Burkholderiales	Comamonadaceae	0	0	0.000238026	0	0	0	0	0.000129729	0	0	0	0
1203	Bacteria	Acidobacteriota	Holophagae	Holophagales	Holophagaceae	0	0	0	0	0	0	0	0.000129729	0	0	0	0
1204	Archaea	Nanoarchaeota	Nanoarchaeia	Woesearchaeales	Woesearchaeales	1.39792e-05	0	0	0	0	0	0	0.000129729	0	0	0	0
1205	Bacteria	Proteobacteria	Alphaproteobacteria	Rhodospirillales	uncultured	0	0	0.000184116	0	0	0	0	0.000129729	0	0	0	0
1206	Bacteria	Bacteroidota	Bacteroidia	Cytophagales	Microscillaceae	0	0	0.000374075	0.000349458	0.000142624	0	0	0.000129729	0	0	0	0
1207	Bacteria	Proteobacteria	Gammaproteobacteria	Burkholderiales	Comamonadaceae	0	0	0	0	0.000278364	0	0	0.000129729	0	0	0	0
1208	Bacteria	Desulfobacterota	Desulfobacteria	Desulfobacterales	Desulfosarcinaceae	0	0.000968531	0	0	0	0	0	0.000129729	0	0	0	0
1209	Bacteria	Dependentiae	Babeliae	Babeliales	Babeliales	0	0	8.01812e-05	0	0	0	0	0.000129729	0	0	0	0
1210	Bacteria	Patescibacteria	Gracilibacteria	Gracilibacteria	Gracilibacteria	0	0	0.000945924	0.000149768	0.000186508	0	0	0.000129729	0	0	0	0
1211	Bacteria	Spirochaetota	Leptospirae	Leptospirales	Leptospiraceae	0	0	0.000144026	0	0	0	0	0.000129729	0	0	0	0
1212	Bacteria	Verrucomicrobiota	Verrucomicrobiae	Pedosphaerales	Pedosphaeraceae	0	0	0.000290518	0	0.000329131	0	0	0.000129729	0	0	0	0
1213	Bacteria	Bdellovibrionota	Bdellovibrionia	Bacteriovoracales	Bacteriovoracaceae	0	0	0	0	0	0	0	0.000110181	0	0	0	0
1214	Bacteria	Cyanobacteria	Cyanobacteriia	Chloroplast	Chloroplast	0.000475292	0	0.00322061	0.00267086	0.000427874	0.00191998	0	0.000110181	0	0	0	0
1215	Bacteria	Patescibacteria	ABY1	Candidatus_Falkowbacteria	Candidatus_Falkowbacteria	0	0.000169918	0	0	0	0	0	0.000110181	0	0	0	0
1216	Bacteria	Proteobacteria	Gammaproteobacteria	Gammaproteobacteria_Incertae_Sedis	Unknown_Family	0	0	4.67724e-05	0	0	0	0	0.000110181	0	0	0	0
1217	Bacteria	Verrucomicrobiota	Omnitrophia	Omnitrophales	Omnitrophales	1.39792e-05	0	0	0	0	0	0	0.000110181	0	0	0	0
1218	Bacteria	Planctomycetota	vadinHA49	vadinHA49	vadinHA49	0.000374572	0	0.000326184	0	0.00134928	0.00114161	0.00209343	0.000110181	0.000299258	0	0.000832293	0
1219	Bacteria	Proteobacteria	Alphaproteobacteria	Rickettsiales	Mitochondria	0	0	0	7.48839e-05	0	0	0	0.000110181	0	0	0	0
1220	Bacteria	Marinimicrobia_(SAR406_clade)	Marinimicrobia_(SAR406_clade)	Marinimicrobia_(SAR406_clade)	Marinimicrobia_(SAR406_clade)	0	0.000152926	0	0	0	0	0	0.000110181	0	0	0	0
1221	Bacteria	Chloroflexi	Dehalococcoidia	Sh765B-AG-111	Sh765B-AG-111	0	0	0	0.000324497	0	0	0	0.000110181	0.000167669	0	0.000190259	0.00042767
1222	Bacteria	Proteobacteria	Alphaproteobacteria	Rhizobiales	Hyphomicrobiaceae	0	0	0	0	0	0	0	0.000110181	0	0	0	0.000153834
1223	Bacteria	Bacteroidota	Kryptonia	Kryptoniales	BSV26	0	0	0	0	0	0	0	0.000110181	0.000258939	0	0	0
1224	Bacteria	Bacteroidota	Bacteroidia	Bacteroidales	p-251-o5	5.59167e-05	0	0	0	0	0	0	0.000110181	2.32929e-05	0	0	0
1225	Bacteria	Chloroflexi	Anaerolineae	SBR1031	SBR1031	0	0.00028886	0	0	0	0	0	0.000110181	0	0	0	0
1226	Bacteria	Verrucomicrobiota	Omnitrophia	Omnitrophales	Omnitrophaceae	0	0	0	0	0	0	0	0.000110181	0	0	0	0
1227	Bacteria	Proteobacteria	Gammaproteobacteria	Pseudomonadales	Moraxellaceae	0	0	0	0	0	0.000467023	0	0.000110181	0	0	0	0
1228	Bacteria	Bdellovibrionota	Bdellovibrionia	Bdellovibrionales	Bdellovibrionaceae	0	0	0	0	0	0	0	0.000110181	0	0	0	0
1229	Bacteria	Proteobacteria	Alphaproteobacteria	Rhizobiales	A0839	0	0	0.000265592	0	0.000460784	0	0	0.000110181	0	0	0	0
1230	Bacteria	Dependentiae	Babeliae	Babeliales	Vermiphilaceae	3.49479e-05	0	0	0	0	0	0	0.000110181	0	0	0	0
1231	Bacteria	Bacteroidota	Bacteroidia	Chitinophagales	Saprospiraceae	0	0	0	0	8.77684e-05	0	0	0.000110181	0	0	0	0
1232	Bacteria	Cyanobacteria	Cyanobacteriia	Chloroplast	Chloroplast	0.000447333	0	0	0	0	0.00212755	0.00209343	0.000110181	0	0	0	0
1233	Bacteria	Firmicutes	Clostridia	Clostridiales	Clostridiaceae	0	0	5.34541e-05	0	0	0	0	0.000110181	0	0	0	0
1234	Bacteria	Myxococcota	Myxococcia	Myxococcales	Myxococcaceae	0	0	0	0.000224652	0	0	0	0.000110181	0	0	0	0
1235	Bacteria	Patescibacteria	Microgenomatia	Candidatus_Woesebacteria	Candidatus_Woesebacteria	0	0	0	0	0	0	0	0.000110181	0	0	0	0
1236	Archaea	Thermoplasmatota	Thermoplasmata	Marine_Group_II	Marine_Group_II	2.09688e-05	0	0	0	0	0	0	0.000110181	0	0	0	0
1237	Bacteria	Bacteroidota	Bacteroidia	Sphingobacteriales	env.OPS_17	0	0	0	0	0	0	0.000661084	0.000110181	0	0	0	0
1238	Bacteria	Proteobacteria	Gammaproteobacteria	Arenicellales	Arenicellaceae	0	0	0	0	0	0	0	0.000110181	0	0	0	0
1239	Bacteria	Dependentiae	Babeliae	Babeliales	Babeliales	0	0	0	0	0	0	0	0.000110181	0	0	0	0
1240	Bacteria	Bacteroidota	Bacteroidia	Cytophagales	Cyclobacteriaceae	5.4484e-05	0	0.000251669	0	0.00105939	0	0	0.000110181	0	0	0	0
1241	Bacteria	Planctomycetota	vadinHA49	vadinHA49	vadinHA49	0	0	0	0	0	0.000207566	0	0.000110181	0	0	0	0
1242	Bacteria	Elusimicrobiota	Lineage_IIb	Lineage_IIb	Lineage_IIb	0	0	0	0.000224652	0	0	0	0.000110181	0	0	0	0
1243	Bacteria	Proteobacteria	Alphaproteobacteria	Rickettsiales	SM2D12	0	0	0.000100227	0	0	0	0	0.000110181	0	0	0	0
1244	Bacteria	Proteobacteria	Gammaproteobacteria	Chromatiales	Chromatiaceae	0.000195708	0	0	0.00019969	0	0	0	0.000110181	0	0	0	0
1245	Bacteria	Planctomycetota	Planctomycetes	Isosphaerales	Isosphaeraceae	0	0	0	0	0	0	0	0.000110181	0	0	0	0
1246	Bacteria	Myxococcota	bacteriap25	bacteriap25	bacteriap25	0	0	0	0	0	0	0	0.000110181	0	0	0	0
1247	Bacteria	Proteobacteria	Alphaproteobacteria	Sphingomonadales	Sphingomonadaceae	0	0	8.41695e-05	0	0	0	0	0.000110181	0	0	0	0
1248	Bacteria	Bdellovibrionota	Bdellovibrionia	Bdellovibrionales	Bdellovibrionaceae	0	0	0	0	0	0	0	0.000110181	0	0	0	0
1249	Bacteria	Proteobacteria	Gammaproteobacteria	Pseudomonadales	Moraxellaceae	0.000202698	0	0	0	0	0	0	0.000110181	0	0	0	0
1250	Bacteria	Planctomycetota	vadinHA49	vadinHA49	vadinHA49	0.000344848	0	0.000718408	0.000349458	0.000945349	0.000778372	0.00165271	0.000110181	0	0	0	0
1251	Bacteria	Proteobacteria	Gammaproteobacteria	Burkholderiales	Hydrogenophilaceae	0	0.00153395	0	0.0030952	0	0	0	0.000110181	0	0	0	0
1252	Bacteria	Myxococcota	Polyangia	Polyangiales	Sandaracinaceae	0	0	0.000193947	0.000224652	0	0	0	0.000103783	0	0	0	0
1253	Bacteria	Proteobacteria	Alphaproteobacteria	Rickettsiales	Mitochondria	0	0.000271868	0	0	0	0	0	0.000103783	4.65858e-05	0	0	0
1254	Bacteria	Firmicutes	Clostridia	Lachnospirales	Lachnospiraceae	0	0	0	0	0	0	0	0.000103783	0	0	0	0
1255	Archaea	Nanoarchaeota	Nanoarchaeia	Woesearchaeales	Woesearchaeales	0	0	0	0.000399381	0	0	0	0.000103783	0	0	0	0
1256	Bacteria	Proteobacteria	Gammaproteobacteria	Burkholderiales	Nitrosomonadaceae	0	0.000237885	0	0	0	0	0	0.000103783	0.000204311	0	0	0
1257	Bacteria	Bdellovibrionota	Oligoflexia	0319-6G20	0319-6G20	0	0	0.000267271	0	0	0	0	0.000103783	0	0	0	0
1258	Bacteria	Proteobacteria	Alphaproteobacteria	Rickettsiales	AB1	0	0	0	0	0	0	0	0.000103783	0	0	0	0
1259	Bacteria	Bacteroidota	Bacteroidia	Chitinophagales	Chitinophagaceae	0	0	0	0	0.000249062	0	0	0.000103783	3.49394e-05	0	0	0
1260	Bacteria	Proteobacteria	Alphaproteobacteria	Caedibacterales	Caedibacteraceae	0	0	8.81578e-05	0	0	0	0	0.000103783	8.96408e-05	0	0	0
1261	Bacteria	Fermentibacterota	Fermentibacteria	Fermentibacterales	Fermentibacteraceae	0	0.000305852	0	0	0	0	0	0.000103783	0	0	0	0
1262	Bacteria	Bacteroidota	Bacteroidia	Bacteroidales	Rikenellaceae	2.79583e-05	0	0	0	0	0	0	0.000103783	0	0	0	0
1263	Bacteria	Fibrobacterota	Chitinivibrionia	uncultured	uncultured	0	0	0	0	0	0	0	0.000103783	0	0	0	0
1264	Bacteria	Elusimicrobiota	Elusimicrobia	MVP-88	MVP-88	2.09688e-05	0	0	0	0	0	0	0.000103783	0	0	0	0
1265	Bacteria	Bacteroidota	Bacteroidia	Chitinophagales	Saprospiraceae	0	0	0	0.000124807	0	0	0	0.000103783	0	0	0	0
1266	Bacteria	Firmicutes	Clostridia	Clostridiales	Clostridiaceae	0.00148554	0.00657245	0	0	0	0	0	0.000103783	0	0	0	0
1267	Bacteria	Bacteroidota	Bacteroidia	Cytophagales	Spirosomaceae	0	0	0	0	0	0	0	0.000103783	0	0	0	0
1268	Bacteria	Bacteroidota	Bacteroidia	Bacteroidales	Bacteroidaceae	0	0	0	4.99226e-05	0	0	0	0.000103783	0	0	0	0
1269	Bacteria	Bdellovibrionota	Bdellovibrionia	Bdellovibrionales	Bdellovibrionaceae	0	0	9.69735e-05	0	0	0	0	0.000103783	0	0	0	0
1270	Bacteria	Proteobacteria	Alphaproteobacteria	Paracaedibacterales	Paracaedibacteraceae	0	0	4.00906e-05	0	0	0	0	0.000103783	0	0	0	0
1271	Bacteria	Spirochaetota	Leptospirae	Leptospirales	Leptospiraceae	0	0	3.52631e-05	0	0	0	0	0.000103783	0	0	0	0
1272	Bacteria	Desulfobacterota	Desulfobulbia	Desulfobulbales	uncultured	8.3875e-05	0	0	0	0	0	0	0.000103783	0	0	0	0
1273	Bacteria	Proteobacteria	Gammaproteobacteria	Enterobacterales	Ambiguous_taxa	0	0	0.000120272	0	0	0	0	0.000103783	0	0	0	0
1274	Bacteria	Acidobacteriota	Subgroup_25	Subgroup_25	Subgroup_25	0	0	0	4.99226e-05	0	0	0	0.000103783	0	0	0	0
1275	Bacteria	Proteobacteria	Alphaproteobacteria	Rickettsiales	Mitochondria	0	0	0.000160362	0	0	0	0	0.000103783	0	0	0	0
1276	Bacteria	Bacteroidota	Bacteroidia	Chitinophagales	Saprospiraceae	0	0	0.000160362	0	0	0	0	0.000103783	0	0	0	0
1277	Bacteria	Bacteroidota	Bacteroidia	Flavobacteriales	Crocinitomicaceae	0	0	0	0	0.000153595	0	0	0.000103783	0	0	0	0
1278	Bacteria	Verrucomicrobiota	Verrucomicrobiae	Pedosphaerales	Pedosphaeraceae	0	0	4.40789e-05	0	0	0	0	0.000103783	0	0	0	0
1279	Bacteria	Bacteroidota	Bacteroidia	Flavobacteriales	Flavobacteriaceae	0	0	0	0	0	0.000985937	0	0.000103783	0	0	0	0
1280	Bacteria	Bacteroidota	Bacteroidia	Bacteroidales	Prolixibacteraceae	0	0	0	0	0	0	0	0.000103783	0	0	0	0
1281	Archaea	Nanoarchaeota	Nanoarchaeia	Woesearchaeales	Woesearchaeales	0	0.000169918	0	0	0	0	0	0.000103783	0	0	0	0
1282	Bacteria	Proteobacteria	Gammaproteobacteria	Steroidobacterales	Steroidobacteraceae	0	0	8.81578e-05	0	0.00061859	0	0	0.000103783	0	0	0	0
1283	Bacteria	Margulisbacteria	Margulisbacteria	Margulisbacteria	Margulisbacteria	0	0	0	0	0	0	0.000220361	0.000103783	0	0	0	0
1284	Archaea	Nanoarchaeota	Nanoarchaeia	Woesearchaeales	Woesearchaeales	0	0	0	0	4.38842e-05	0	0	8.26355e-05	0	0	0	0
1285	Bacteria	Patescibacteria	Gracilibacteria	Absconditabacteriales_(SR1)	Absconditabacteriales_(SR1)	0	0	0	0	0	0	0.000110181	8.26355e-05	0	0	0	0
1286	Bacteria	Planctomycetota	Phycisphaerae	Phycisphaerales	AKAU3564_sediment_group	0	0.000101951	0	0	0	0	0	8.26355e-05	0	0	0	0
1287	Bacteria	Bacteroidota	Bacteroidia	Chitinophagales	Saprospiraceae	0	0	4.00906e-05	0	0	0	0	8.26355e-05	0	0	0	0
1288	Bacteria	Bacteroidota	Bacteroidia	Cytophagales	Microscillaceae	0	0	0	0	0	0	0.000936536	8.26355e-05	0	0	0	0
1289	Bacteria	Bacteroidota	Kapabacteria	Kapabacteriales	Kapabacteriales	0	0	0.000127102	0	0	0	0	8.26355e-05	0	0	0	0
1290	Bacteria	Proteobacteria	Alphaproteobacteria	Rhodospirillales	uncultured	0	0	0	0	0	0	0	8.26355e-05	0	0	0	0
1291	Bacteria	Bacteroidota	Kryptonia	Kryptoniales	MSB-3C8	0	0	6.68177e-05	0	0	0	0	8.26355e-05	0.000302808	0.00135028	0	0
1292	Bacteria	Proteobacteria	Gammaproteobacteria	Burkholderiales	Hydrogenophilaceae	0	0	0	0	0	0	0.00143235	8.26355e-05	0	0.000139489	0	0
1293	Bacteria	Proteobacteria	Gammaproteobacteria	Burkholderiales	Methylophilaceae	0	0	0.000361447	0	0	0	0	8.26355e-05	0	0	0	0.0011153
1294	Bacteria	Proteobacteria	Gammaproteobacteria	Diplorickettsiales	Diplorickettsiaceae	0	0	0	0.00037442	0	0	0	8.26355e-05	0.000266093	0	0	0
1295	Bacteria	Cyanobacteria	Cyanobacteriia	Leptolyngbyales	Leptolyngbyaceae	0	0	0	0.00019969	0	0	0	8.26355e-05	2.32929e-05	0	0	0
1296	Bacteria	Bdellovibrionota	Oligoflexia	Oligoflexales	uncultured	0	0	8.01812e-05	0	0	0	0	8.26355e-05	0	0	0	0
1297	Bacteria	Patescibacteria	CPR2	CPR2	CPR2	0	0	1.76316e-05	0	0	0	0	8.26355e-05	0	0	0	0
1298	Archaea	Nanoarchaeota	Nanoarchaeia	Woesearchaeales	Woesearchaeales	0	0	0	0	0	0	0	8.26355e-05	0	0	0	0
1299	Archaea	Crenarchaeota	Bathyarchaeia	Bathyarchaeia	Bathyarchaeia	0	0	4.67724e-05	0	0	0	0	8.26355e-05	0	0	0	0
1300	Bacteria	Cyanobacteria	Sericytochromatia	Sericytochromatia	Sericytochromatia	0	0	0	0	0	0	0.000220361	8.26355e-05	0	0	0	0
1301	Bacteria	Proteobacteria	Alphaproteobacteria	Rickettsiales	SM2D12	0	0	0	0	8.79044e-05	0	0	8.26355e-05	0	0	0	0
1302	Bacteria	Bdellovibrionota	Bdellovibrionia	Bdellovibrionales	Bdellovibrionaceae	0	0	0	0.00019969	0	0	0	8.26355e-05	0	0	0	0
1303	Bacteria	Patescibacteria	Gracilibacteria	Candidatus_Peregrinibacteria	Candidatus_Peregrinibacteria	0	0	0	0	0	0	0	8.26355e-05	0	0	0	0
1304	Bacteria	Bacteroidota	Bacteroidia	Sphingobacteriales	Sphingobacteriaceae	0	0	0	0	0	0.000155674	0	8.26355e-05	0	0	0	0
1305	Bacteria	Patescibacteria	Microgenomatia	Candidatus_Woesebacteria	Candidatus_Woesebacteria	2.09688e-05	0	0	0	0	0	0	8.26355e-05	0	0	0	0
1306	Bacteria	Desulfobacterota	Desulfobulbia	Desulfobulbales	Desulfobulbaceae	0	0	0	0	0	0	0	8.26355e-05	0	0	0	0
1307	Bacteria	Proteobacteria	Alphaproteobacteria	Micavibrionales	uncultured	0	0	0	0	0	0	0	8.26355e-05	0	0	0	0
1308	Bacteria	Planctomycetota	Planctomycetes	Pirellulales	Pirellulaceae	0	0	0	0	0	0	0	8.26355e-05	0	0	0	0
1309	Bacteria	Chloroflexi	JG30-KF-CM66	JG30-KF-CM66	JG30-KF-CM66	0	0	0	0	0	0	0	8.26355e-05	0	0	0	0
1310	Bacteria	Chloroflexi	Anaerolineae	SBR1031	A4b	0	0	0	0	0	0	0	8.26355e-05	0	0	0	0
1311	Bacteria	Firmicutes	Clostridia	Clostridia	Hungateiclostridiaceae	0	0.000203901	0	0	0	0	0	8.26355e-05	0	0	0	0
1312	Bacteria	Poribacteria	Poribacteria	Poribacteria	Poribacteria	0	0.000356827	0	0	0	0	0	8.26355e-05	0	0	0	0
1313	Bacteria	Proteobacteria	Alphaproteobacteria	Rhodospirillales	Magnetospiraceae	0	0	0	0	0	0	0	8.26355e-05	0	0	0	0
1314	Bacteria	Cyanobacteria	Sericytochromatia	Sericytochromatia	Sericytochromatia	0	0	0	0	0	0	0	8.26355e-05	0	0	0	0
1315	Bacteria	Bacteroidota	Bacteroidia	Cytophagales	Microscillaceae	0.000146781	0	0.000181574	0.000424342	0.000131857	0.000415132	0.000991626	8.26355e-05	0	0	0	0
1316	Bacteria	Proteobacteria	Gammaproteobacteria	Acidiferrobacterales	Acidiferrobacteraceae	0	0	0.000773023	0	0.000219421	0	0	8.26355e-05	0	0	0	0
1317	Bacteria	Bacteroidota	Bacteroidia	Chitinophagales	Saprospiraceae	0	0	1.33635e-05	0	0	0	0	8.26355e-05	0	0	0	0
1318	Bacteria	Proteobacteria	Gammaproteobacteria	B2M28	B2M28	0	0.000611704	0	0	0	0	0	8.26355e-05	0	0	0	0
1319	Bacteria	Proteobacteria	Alphaproteobacteria	Rickettsiales	Mitochondria	0	0	0	0	0	0	0	8.26355e-05	0	0	0	0
1320	Bacteria	Bdellovibrionota	Oligoflexia	0319-6G20	0319-6G20	0	0	4.67724e-05	0	0	0	0	8.26355e-05	0	0	0	0
1321	Bacteria	Proteobacteria	Alphaproteobacteria	Rickettsiales	SM2D12	0	0	0	0	0.000817753	0	0	8.26355e-05	0	0	0	0
1322	Bacteria	Chloroflexi	Anaerolineae	SBR1031	SBR1031	0	0	5.28947e-05	0	0	0	0	8.26355e-05	0	0	0	0
1323	Bacteria	Firmicutes	Clostridia	Peptostreptococcales-Tissierellales	Peptostreptococcaceae	0	0	0.000240544	0	0	0.00072648	0	8.26355e-05	0	0	0	0
1324	Bacteria	Desulfobacterota	Syntrophobacteria	Syntrophobacterales	uncultured	0	0	0	0	0	0	0	8.26355e-05	0	0	0	0
1325	Bacteria	Bdellovibrionota	Bdellovibrionia	Bdellovibrionales	Bdellovibrionaceae	0	0	0	0	2.19421e-05	0	0	8.26355e-05	0	0	0	0
1326	Bacteria	Myxococcota	Polyangia	UASB-TL25	UASB-TL25	3.49479e-05	0	0.000124196	9.98452e-05	0.00010971	0	0	8.26355e-05	0	0	0	0
1327	Bacteria	Planctomycetota	Pla3_lineage	Pla3_lineage	Pla3_lineage	0	0	0	0	0	0	0	8.26355e-05	0	0	0	0
1328	Bacteria	Proteobacteria	Alphaproteobacteria	Rickettsiales	AB1	3.49479e-05	0	0	0	0	0	0	8.26355e-05	0	0	0	0
1329	Bacteria	Planctomycetota	Brocadiae	Brocadiales	Brocadiaceae	0	0	0	0	7.67973e-05	0	0	8.26355e-05	0	0	0	0
1330	Bacteria	Bdellovibrionota	Oligoflexia	Oligoflexales	uncultured	0	0	0	0	6.58263e-05	0	0	8.26355e-05	0	0	0	0
1331	Bacteria	Proteobacteria	Alphaproteobacteria	Rhizobiales	Rhizobiales_Incertae_Sedis	0	0	0.000174741	0.000524188	0	0	0	8.26355e-05	0	0	0	0
1332	Bacteria	Verrucomicrobiota	Verrucomicrobiae	Pedosphaerales	Pedosphaeraceae	0	0	0	0	0	0	0	8.26355e-05	0	0	0	0
1333	Bacteria	Bdellovibrionota	Oligoflexia	Oligoflexales	uncultured	0	0	2.00453e-05	0	0	0	0	7.78372e-05	0	0	0	0
1334	Bacteria	Bacteroidota	Bacteroidia	Bacteroidales	Rikenellaceae	0	0	0	0.000224652	0	0	0	7.78372e-05	0	0	0	0
1335	Bacteria	Proteobacteria	Gammaproteobacteria	Cellvibrionales	Cellvibrionaceae	0	0	0	0	8.77684e-05	0	0	7.78372e-05	0	0	0	0
1336	Bacteria	Proteobacteria	Gammaproteobacteria	Diplorickettsiales	Diplorickettsiaceae	0	0	0	0	0	0	0.000495813	7.78372e-05	0.000671097	0	0.000161835	0.000267294
1337	Bacteria	Bacteroidota	Bacteroidia	Flavobacteriales	Weeksellaceae	0.000385128	0	0	0	0.000194488	0	0	7.78372e-05	0.000754466	0	0.000568757	0
1338	Bacteria	Verrucomicrobiota	Omnitrophia	Omnitrophales	Omnitrophaceae	0	0	0	0	0	0	0	7.78372e-05	4.07458e-05	0	0	0
1339	Bacteria	Proteobacteria	Gammaproteobacteria	uncultured	uncultured	0	0	0	0	0	0	0	7.78372e-05	0	0	0	0
1340	Bacteria	Elusimicrobiota	Lineage_IIc	Lineage_IIc	Lineage_IIc	0	0	0	0	0	0	0	7.78372e-05	0	0	0	0
1341	Bacteria	Myxococcota	Myxococcia	Myxococcales	Myxococcaceae	0	0	4.00906e-05	0	0	0	0	7.78372e-05	0	0	0	0
1342	Bacteria	Proteobacteria	Gammaproteobacteria	Xanthomonadales	Xanthomonadaceae	0	0	0.000246842	0	0	0	0	7.78372e-05	0	0	0	0
1343	Bacteria	Cyanobacteria	Cyanobacteriia	Synechococcales	Synechococcales_Incertae_Sedis	0	0	0.000907869	0.00129799	0	0.00560428	0.00319524	7.78372e-05	0	0	0	0
1344	Bacteria	Nitrospirota	Nitrospiria	Nitrospirales	Nitrospiraceae	0	0	0	0	0	0	0.00209343	7.78372e-05	0	0	0	0
1345	Bacteria	Bacteroidota	Bacteroidia	Cytophagales	Microscillaceae	0	0	0	0	0.000197479	0	0.000771265	7.78372e-05	0	0	0	0
1346	Bacteria	Bacteroidota	Bacteroidia	Chitinophagales	Saprospiraceae	0	0	0	0	4.38842e-05	0	0	7.78372e-05	0	0	0	0
1347	Bacteria	Verrucomicrobiota	Verrucomicrobiae	Pedosphaerales	Pedosphaeraceae	0	0	2.67271e-05	0	0	0	0	7.78372e-05	0	0	0	0
1348	Archaea	Nanoarchaeota	Nanoarchaeia	Woesearchaeales	Woesearchaeales	0	0	0	0	0	0	0	7.78372e-05	0	0	0	0
1349	Bacteria	Cyanobacteria	Cyanobacteriia	Chloroplast	Chloroplast	0	0	0	0.000174729	0	0	0	7.78372e-05	0	0	0	0
1350	Bacteria	Proteobacteria	Gammaproteobacteria	Burkholderiales	Comamonadaceae	0.00017474	0	0.000776452	0.000748839	0	0	0	7.78372e-05	0	0	0	0
1351	Bacteria	Bdellovibrionota	Bdellovibrionia	Bdellovibrionales	Bdellovibrionaceae	0	0	0	0	0	0	0	7.78372e-05	0	0	0	0
1352	Bacteria	Proteobacteria	Alphaproteobacteria	Rickettsiales	Fokiniaceae	0	0	0	7.48839e-05	0	0	0	7.78372e-05	0	0	0	0
1353	Bacteria	Patescibacteria	Parcubacteria	Candidatus_Giovannonibacteria	Candidatus_Giovannonibacteria	0	0	0	0	0	0	0	7.78372e-05	0	0	0	0
1354	Bacteria	Proteobacteria	Gammaproteobacteria	Burkholderiales	Gallionellaceae	0	0	0	0	0	0	0	7.78372e-05	0	0	0	0
1355	Bacteria	Bdellovibrionota	Oligoflexia	0319-6G20	0319-6G20	0	0	0	0	0	0	0	7.78372e-05	0	0	0	0
1356	Bacteria	Proteobacteria	Gammaproteobacteria	Ambiguous_taxa	Ambiguous_taxa	0	0	0	0.000723878	0	0	0	7.78372e-05	0	0	0	0
1357	Bacteria	Planctomycetota	Pla4_lineage	Pla4_lineage	Pla4_lineage	0	0	0	0	8.77684e-05	0	0	7.78372e-05	0	0	0	0
1358	Archaea	Nanoarchaeota	Nanoarchaeia	Woesearchaeales	Woesearchaeales	0	0	0	0	0	0.000103783	0	7.78372e-05	0	0	0	0
1359	Bacteria	Chloroflexi	Anaerolineae	Anaerolineales	Anaerolineaceae	0	0	0	0.000449304	0	0	0	7.78372e-05	0	0	0	0
1360	Bacteria	Verrucomicrobiota	Omnitrophia	Omnitrophales	Omnitrophaceae	0	0	5.34541e-05	0	0	0	0	7.78372e-05	0	0	0	0
1361	Bacteria	Proteobacteria	Alphaproteobacteria	Kiloniellales	Kiloniellaceae	0	0.000271868	0	0.000648994	0	0	0	7.78372e-05	0	0	0	0
1362	Bacteria	Proteobacteria	Gammaproteobacteria	Burkholderiales	Nitrosomonadaceae	0	0	0	0	0	0	0	7.78372e-05	0	0	0	0
1363	Bacteria	Proteobacteria	Gammaproteobacteria	Coxiellales	Coxiellaceae	0	0	0	0	0	0	0.00484795	7.78372e-05	0	0	0	0
1364	Bacteria	Bdellovibrionota	Bdellovibrionia	Bdellovibrionales	Bdellovibrionaceae	0	0	0	0	0	0	0	7.78372e-05	0	0	0	0
1365	Bacteria	Cyanobacteria	Sericytochromatia	Sericytochromatia	Sericytochromatia	6.98959e-05	0	0.000148014	0	0	0	0	7.78372e-05	0	0	0	0
1366	Bacteria	Myxococcota	Polyangia	Polyangiales	BIrii41	0	0	0.000117578	0	0	0	0	7.78372e-05	0	0	0	0
1367	Bacteria	Proteobacteria	Gammaproteobacteria	Acidiferrobacterales	Acidiferrobacteraceae	0	0	0	0.000399381	0	0	0	7.78372e-05	0	0	0	0
1368	Bacteria	Chloroflexi	Anaerolineae	Anaerolineales	Anaerolineaceae	0	0	0	0	0	0	0	7.78372e-05	0	0	0	0
1369	Bacteria	Desulfobacterota	Desulfobulbia	Desulfobulbales	Desulfobulbaceae	0	0	0	0	0	0	0	7.78372e-05	0	0	0	0
1370	Bacteria	Myxococcota	Polyangia	Polyangiales	BIrii41	0	0	0	0.000249613	0	0	0	5.50903e-05	0	0	0	0
1371	Bacteria	Proteobacteria	Alphaproteobacteria	Micavibrionales	Micavibrionaceae	0	0	0	0	0	0	0	5.50903e-05	0	0	0	0
1372	Bacteria	Firmicutes	Clostridia	Lachnospirales	Lachnospiraceae	0	0	0	0	9.87394e-05	0	0	5.50903e-05	0	0	0	0
1373	Bacteria	Actinobacteriota	WCHB1-81	WCHB1-81	WCHB1-81	0	0	0	0	0	0	0	5.50903e-05	0	0	0	0
1374	Bacteria	Bacteroidota	Bacteroidia	Flavobacteriales	Flavobacteriaceae	0.00163452	0	0	0	0	0	0	5.50903e-05	0.000483158	0	0	0
1375	Bacteria	Proteobacteria	Alphaproteobacteria	Holosporales	Holosporaceae	0	0	0	0	0	0	0	5.50903e-05	0	0	0	0
1376	Bacteria	Proteobacteria	Gammaproteobacteria	Steroidobacterales	Woeseiaceae	0	0	1.33635e-05	0	0	0	0	5.50903e-05	0	0	0	0
1377	Bacteria	Proteobacteria	Alphaproteobacteria	Caulobacterales	Hyphomonadaceae	0	0	0.000114605	0.000449304	0	0	0	5.50903e-05	0	0	0	0
1378	Bacteria	Proteobacteria	Gammaproteobacteria	Xanthomonadales	Rhodanobacteraceae	0	0	0	0	0	0	0	5.50903e-05	0	0	0	0
1379	Bacteria	Bacteroidota	Bacteroidia	Bacteroidales	Dysgonomonadaceae	0	0	5.44722e-05	0	0	0	0	5.50903e-05	0	0	0	0
1380	Bacteria	Verrucomicrobiota	Lentisphaeria	SS1-B-02-17	SS1-B-02-17	0	0	0	0	0	0	0	5.50903e-05	0	0	0	0
1381	Bacteria	Proteobacteria	Alphaproteobacteria	Rickettsiales	Mitochondria	0	0	0.00159149	0	0	0	0	5.50903e-05	0	0	0	0
1382	Bacteria	Myxococcota	bacteriap25	bacteriap25	bacteriap25	0	0	0	0	0	0	0	5.50903e-05	0	0	0	0
1383	Bacteria	Proteobacteria	Gammaproteobacteria	Burkholderiales	Burkholderiaceae	0	0	0	0	0	0	0	5.50903e-05	0	0	0	0
1384	Bacteria	Bacteroidota	Bacteroidia	Chitinophagales	Chitinophagaceae	0	0	0	0	0	0	0	5.50903e-05	0	0	0	0
1385	Bacteria	Acidobacteriota	Blastocatellia	DS-100	DS-100	0	0	0	0	0	0	0.000881446	5.50903e-05	0	0	0	0
1386	Bacteria	Planctomycetota	Planctomycetes	Pirellulales	Pirellulaceae	0	0	0.000105789	0	0	0	0	5.50903e-05	0	0	0	0
1387	Bacteria	Bdellovibrionota	Oligoflexia	Oligoflexales	uncultured	0	0	0	0	0	0	0	5.50903e-05	0	0	0	0
1388	Bacteria	Bacteroidota	Bacteroidia	Cytophagales	Microscillaceae	0	0	8.01812e-05	0	0	0	0	5.50903e-05	0	0	0	0
1389	Bacteria	Cyanobacteria	Cyanobacteriia	Cyanobacteriales	Nostocaceae	0	0	0	0	0	0	0	5.50903e-05	0	0	0	0
1390	Bacteria	Cyanobacteria	Cyanobacteriia	Cyanobacteriales	Oscillatoriaceae	0	0	0.000123421	0	0	0	0	5.50903e-05	0	0	0	0
1391	Bacteria	Proteobacteria	Alphaproteobacteria	Rhizobiales	A0839	0	0	8.01812e-05	0	0	0	0	5.50903e-05	0	0	0	0
1392	Bacteria	Verrucomicrobiota	Omnitrophia	Omnitrophales	Omnitrophaceae	0	0	2.67271e-05	0	0	0	0	5.50903e-05	0	0	0	0
1393	Bacteria	Myxococcota	Polyangia	mle1-27	mle1-27	0	0	0	0	0	0	0	5.50903e-05	0	0	0	0
1394	Bacteria	Cyanobacteria	Cyanobacteriia	Leptolyngbyales	Leptolyngbyaceae	0	0	1.76316e-05	0	0	0	0	5.50903e-05	0	0	0	0
1395	Bacteria	Myxococcota	bacteriap25	bacteriap25	bacteriap25	0	0	0	0	0	0	0.000440723	5.18914e-05	0	0	0	0
1396	Bacteria	Proteobacteria	Gammaproteobacteria	Burkholderiales	Comamonadaceae	0.00164077	0	0.00244024	0.00284559	0.00940001	0.00503347	0.00325033	5.18914e-05	7.33425e-05	0	0.000208073	0
1397	Bacteria	Bacteroidota	Bacteroidia	Chitinophagales	Saprospiraceae	0	0	0	0	7.32536e-05	0	0	5.18914e-05	0	0	0	0
1398	Bacteria	Cyanobacteria	Vampirivibrionia	Gastranaerophilales	Gastranaerophilales	0	0	0	0	0	0	0	5.18914e-05	0	0	0	0
1399	Bacteria	Bdellovibrionota	Bdellovibrionia	Bdellovibrionales	Bdellovibrionaceae	0	0	0	0	0	0	0	5.18914e-05	0	0	0	0
1400	Bacteria	Firmicutes	Bacilli	Thermoactinomycetales	Thermoactinomycetaceae	0	8.49589e-05	0	0	0	0	0	5.18914e-05	0	0	0	0
1401	Eukaryota	Eukaryota	Ulvophyceae	Ulvophyceae	Ulvophyceae	0	0	8.81578e-05	0	0	0	0	5.18914e-05	0	0	0	0
1402	Bacteria	Nitrospirota	Nitrospiria	Nitrospirales	Nitrospiraceae	0	0	0	0	7.67973e-05	0	0	5.18914e-05	0	0	0	0
1403	Bacteria	Verrucomicrobiota	Verrucomicrobiae	Pedosphaerales	Pedosphaeraceae	0.000146781	0	0.000526564	0	0	0	0	5.18914e-05	0	0	0	0
1404	Bacteria	Myxococcota	Polyangia	Polyangiales	BIrii41	0	0	0	0.000249613	0	0	0	5.18914e-05	0	0	0	0
1405	Bacteria	Chloroflexi	Anaerolineae	RBG-13-54-9	RBG-13-54-9	0	0	0	0	9.87394e-05	0	0	5.18914e-05	0	0	0	0
1406	Bacteria	Verrucomicrobiota	Omnitrophia	Omnitrophales	Omnitrophaceae	0	0	0	0	0	0	0	5.18914e-05	0	0	0	0
1407	Bacteria	Gemmatimonadota	PAUC43f_marine_benthic_group	PAUC43f_marine_benthic_group	PAUC43f_marine_benthic_group	0	0.000305852	0	0	0	0	0	5.18914e-05	0	0	0	0
1408	Bacteria	Cyanobacteria	Cyanobacteriia	Leptolyngbyales	Leptolyngbyaceae	0	0	9.35447e-05	0	0	0	0	5.18914e-05	0	0	0	0
1409	Bacteria	Bacteroidota	Bacteroidia	Chitinophagales	uncultured	0	0	6.17104e-05	0	0	0	0	5.18914e-05	0	0	0	0
1410	Bacteria	Cyanobacteria	Vampirivibrionia	Vampirovibrionales	Vampirovibrionales	0	0	0	4.99226e-05	0	0	0	5.18914e-05	0	0	0	0
1411	Archaea	Halobacterota	ANME-1	ANME-1b	ANME-1b	0	0	5.28947e-05	0	0	0	0	5.18914e-05	0	0	0	0
1412	Bacteria	Planctomycetota	Pla4_lineage	Pla4_lineage	Pla4_lineage	0	0	0	0	0	0	0	5.18914e-05	0	0	0	0
1413	Bacteria	Bdellovibrionota	Oligoflexia	Silvanigrellales	Silvanigrellaceae	0	0	4.00906e-05	0	0	0	0	5.18914e-05	0	0	0	0
1414	Bacteria	Patescibacteria	ABY1	Candidatus_Magasanikbacteria	Candidatus_Magasanikbacteria	0	0	0	0	0	0	0	5.18914e-05	0	0	0	0
1415	Bacteria	Proteobacteria	Alphaproteobacteria	Rhodospirillales	AEGEAN-169_marine_group	0	0	5.34541e-05	0	0	0	0	5.18914e-05	0	0	0	0
1416	Bacteria	Proteobacteria	Alphaproteobacteria	Rhizobiales	Hyphomicrobiaceae	9.08646e-05	0	0.000525115	0.000873646	0	0	0	5.18914e-05	0	0	0	0
1417	Bacteria	Bacteroidota	Bacteroidia	Chitinophagales	Saprospiraceae	0	0	0	0	0	0	0	5.18914e-05	0	0	0	0
1418	Bacteria	Bacteroidota	Bacteroidia	Cytophagales	Cytophagaceae	0	0	0.0001675	0	0	0	0	5.18914e-05	0	0	0	0
1419	Bacteria	Proteobacteria	Gammaproteobacteria	Diplorickettsiales	Diplorickettsiaceae	0	0	0	0	0	0	0.000495813	5.18914e-05	0	0	0	0
1420	Bacteria	Calditrichota	Calditrichia	Calditrichales	Calditrichaceae	0	0	0	0.000399381	0	0	0	5.18914e-05	0	0	0	0
1421	Bacteria	Dependentiae	Babeliae	Babeliales	Babeliales	0	0	0	0	0	0.000207566	0	0	0	0	0	0
1422	Bacteria	Verrucomicrobiota	Verrucomicrobiae	Verrucomicrobiales	Rubritaleaceae	1.39792e-05	0	0	0	0	0	0	0	0	0	0	0
1423	Bacteria	Armatimonadota	Fimbriimonadia	Fimbriimonadales	Fimbriimonadaceae	0	0	0	0.000149768	0	0	0	0	0.000710434	0	0.00117908	0
1424	Bacteria	Bdellovibrionota	Oligoflexia	0319-6G20	0319-6G20	0	0	0	0	0	0	0	0	0.000675495	0	0.00101471	0.00053842
1425	Bacteria	Proteobacteria	Gammaproteobacteria	Burkholderiales	Sutterellaceae	0	0	0	9.98452e-05	0	0	0	0	0	0	0.00266362	0
1426	Bacteria	Proteobacteria	Gammaproteobacteria	Diplorickettsiales	Diplorickettsiaceae	0	0	0	0	0	0	0	0	0	0	0	0
1427	Bacteria	Proteobacteria	Alphaproteobacteria	Rickettsiales	Candidatus_Hepatincola	0.000125813	0	0.000217889	0.000124807	4.39522e-05	0	0.000495813	0	0.00041306	0	0	0
1428	Bacteria	Proteobacteria	Gammaproteobacteria	Diplorickettsiales	Diplorickettsiaceae	0	0	0	0	0	0	0.000550903	0	3.49394e-05	0	9.51294e-05	0
1429	Bacteria	Acidobacteriota	Thermoanaerobaculia	Thermoanaerobaculales	Thermoanaerobaculaceae	1.39792e-05	0	0	0	2.19421e-05	0	0.000275452	0	0	0	0.00171233	0
1430	Bacteria	Cyanobacteria	Cyanobacteriia	Chloroplast	Chloroplast	0	0	0	0	0	0	0	0	0	0	0	0
1431	Bacteria	Bacteroidota	Bacteroidia	Sphingobacteriales	env.OPS_17	0	0	0	0	0	0	0.000550903	0	0	0	0	0
1432	Bacteria	Acidobacteriota	Blastocatellia	2025-11-24	2025-11-24	0	0	0	0	0	0	0	0	0	0	0	0
1433	Bacteria	SAR324_clade(Marine_group_B)	SAR324_clade(Marine_group_B)	SAR324_clade(Marine_group_B)	SAR324_clade(Marine_group_B)	0	0	0	0	0	0	0	0	0	0	0	0
1434	Bacteria	Cyanobacteria	Cyanobacteriia	Chloroplast	Chloroplast	0.000435872	0	0	0	0	0	0	0	0	0	0	0
1435	Bacteria	Firmicutes	Clostridia	Lachnospirales	Lachnospiraceae	0	0	8.81578e-05	0	0	0	0	0	0.000821682	0	0	0
1436	Bacteria	Proteobacteria	Alphaproteobacteria	Rickettsiales	Rickettsiaceae	0	0	0	0	0	0	0	0	0	0	0	0
1437	Bacteria	Proteobacteria	Gammaproteobacteria	Burkholderiales	Nitrosomonadaceae	0	0	0	0	0	0	0	0	0.00129592	0	0	0
1438	Bacteria	Bdellovibrionota	Bdellovibrionia	Bdellovibrionales	Bdellovibrionaceae	0	0	0	0	0	0	0	0	0.000593969	0	0	0
1439	Bacteria	Verrucomicrobiota	Verrucomicrobiae	Chthoniobacterales	Chthoniobacteraceae	0	0	0	0	0	0	0	0	0.00262946	0.00278979	0.0036604	0.000908799
1440	Bacteria	Proteobacteria	Gammaproteobacteria	Diplorickettsiales	Diplorickettsiaceae	0	0	0	0	0	0	0	0	0	0	0	0
1441	Archaea	Nanoarchaeota	Nanoarchaeia	Woesearchaeales	Woesearchaeales	0	0	0	0	0	0	0	0	0.00264363	0	0.00187266	0
1442	Bacteria	Patescibacteria	Gracilibacteria	Absconditabacteriales_(SR1)	Absconditabacteriales_(SR1)	0	0	2.00453e-05	0.000124807	0.000238953	0	0	0	0.00231075	0	0.0052871	0
1443	Bacteria	Verrucomicrobiota	Verrucomicrobiae	Opitutales	Opitutaceae	0	0	0	0	0	0	0	0	0	0	0	0
1444	Bacteria	Patescibacteria	Saccharimonadia	Saccharimonadales	Saccharimonadaceae	4.19375e-05	0	0	0	0	0	0	0	0	0	0.000868674	0
1445	Bacteria	Bacteroidota	Bacteroidia	Flavobacteriales	Flavobacteriaceae	0.00901369	0	0	0	0	0	0	0	0	0	0	0
1446	Bacteria	Proteobacteria	Gammaproteobacteria	Ga0077536	Ga0077536	0	0	0	0.000624033	0	0	0	0	0.000885131	0.000766284	0	0.00278369
1447	Bacteria	Fibrobacterota	Fibrobacteria	Fibrobacterales	Fibrobacteraceae	0	0	8.6863e-05	0	0	0	0	0	0	0	0	0
1448	Bacteria	Proteobacteria	Gammaproteobacteria	Burkholderiales	Hydrogenophilaceae	0	0	9.07869e-05	0.000474265	0	0	0	0	0.00170215	0	0.00492556	0
1449	Bacteria	Patescibacteria	Parcubacteria	Candidatus_Nomurabacteria	Candidatus_Nomurabacteria	1.39792e-05	0	0	0	0	0	0	0	0.00956413	0	0.00274151	0
1450	Bacteria	Acidobacteriota	Subgroup_22	Subgroup_22	Subgroup_22	0	0	0	0.000249613	0	0	0	0	0	0	0	0
1451	Bacteria	Cyanobacteria	Cyanobacteriia	Cyanobacteriales	Phormidiaceae	9.55384e-05	0	0.00107576	0	0	0	0	0	0	0	0	0
1452	Bacteria	Proteobacteria	Gammaproteobacteria	Enterobacterales	Enterobacteriaceae	0	0	5.34541e-05	0	0	0	0	0	0	0	0	0
1453	Bacteria	Cyanobacteria	Cyanobacteriia	Chloroplast	Chloroplast	0	0	0	0.000224652	0	0	0	0	0	0	0	0
1454	Archaea	Nanoarchaeota	Nanoarchaeia	Woesearchaeales	Woesearchaeales	0	0	0	0.000224652	0	0	0	0	0	0	0	0
1455	Bacteria	Dependentiae	Babeliae	Babeliales	Babeliales	0	0	0	0	0	0	0	0	0	0	0.000439266	0
1456	Bacteria	Bacteroidota	Bacteroidia	Sphingobacteriales	env.OPS_17	0	0	0	0	0	0	0.000385632	0	0	0	0	0
1457	Bacteria	Verrucomicrobiota	Lentisphaeria	SS1-B-02-17	SS1-B-02-17	0	0	0	0	0	0.000207566	0	0	0	0	0	0
1458	Bacteria	Nitrospinota	P9X2b3D02	P9X2b3D02	P9X2b3D02	0	0	0	0	0	0.000259457	0	0	0	0	0	0
1459	Bacteria	Bdellovibrionota	Oligoflexia	0319-6G20	0319-6G20	0	0	0	0	4.38842e-05	0	0	0	0	0	0.000508623	0
1460	Bacteria	Bacteroidota	Bacteroidia	Cytophagales	Microscillaceae	0	0	0.000114605	0	0	0	0	0	0	0	0	0
1461	Bacteria	Elusimicrobiota	Elusimicrobia	Lineage_IV	Lineage_IV	0	0	0	0.000474265	0	0	0	0	0	0	0	0
1462	Bacteria	Campilobacterota	Campylobacteria	Campylobacterales	Sulfurimonadaceae	0	0	0	0	0	0	0	0	0.00160907	0.00446366	0.00483562	0.00267294
1463	Bacteria	Bacteroidota	Bacteroidia	Cytophagales	Cytophagaceae	0	0	0	0	0	0.000518914	0	0	0.000139758	0	0	0
1464	Bacteria	Proteobacteria	Gammaproteobacteria	Gammaproteobacteria_Incertae_Sedis	Unknown_Family	0	0.000237885	0	0	0	0	0	0	0	0	0	0
1465	Bacteria	Bdellovibrionota	Oligoflexia	0319-6G20	0319-6G20	0	0	0	0	0	0	0	0	0	0	0	0
1466	Bacteria	Bacteroidota	Bacteroidia	Flavobacteriales	Flavobacteriaceae	0.000549346	0	0	0	0	0	0	0	0	0	0	0
1467	Bacteria	Proteobacteria	Gammaproteobacteria	Diplorickettsiales	Diplorickettsiaceae	0	0	0	0	0	0	0	0	0	0	0	0
1468	Bacteria	Proteobacteria	Gammaproteobacteria	Diplorickettsiales	Diplorickettsiaceae	0	0	0	0	0	0	0	0	0	0	0	0
1469	Bacteria	Proteobacteria	Gammaproteobacteria	Burkholderiales	Comamonadaceae	0	0.00060024	0	0	0	0	0	0	0.000682758	0.00104617	0	0
1470	Bacteria	Bacteroidota	Bacteroidia	Sphingobacteriales	env.OPS_17	0	0	0	0	0	0	0	0	0	0	0	0
1471	Bacteria	Acidobacteriota	Subgroup_18	Subgroup_18	Subgroup_18	0	0	0	0	0	0.000103783	0	0	0	0	0	0
1472	Bacteria	Bacteroidota	Bacteroidia	Chitinophagales	uncultured	0	0	0	0	2.93015e-05	0	0	0	0.0032327	0	0.00337686	0
1473	Bacteria	Patescibacteria	Microgenomatia	Candidatus_Woesebacteria	Candidatus_Woesebacteria	0	0	0	0	0	0	0	0	0	0	0	0
1474	Bacteria	Firmicutes	Clostridia	Clostridiales	Clostridiaceae	0	0.000509753	0	0	0	0	0	0	0	0	0	0
1475	Bacteria	Campilobacterota	Campylobacteria	Campylobacterales	Sulfurimonadaceae	0.000146781	0	0	0.000973491	0	0	0.00165271	0	0	0	0	0
1476	Bacteria	Proteobacteria	Gammaproteobacteria	Burkholderiales	Sutterellaceae	0	0	0.000158684	0	0	0	0	0	0	0	0.000638115	0
1477	Bacteria	Bdellovibrionota	Oligoflexia	Oligoflexales	Oligoflexales	0	0	0	7.48839e-05	0	0	0	0	0	0	0.000729325	0
1478	Bacteria	Bacteroidota	Bacteroidia	Chitinophagales	Saprospiraceae	0	0	0	0.000174729	0	0	0	0	0	0	0	0
1479	Bacteria	Chloroflexi	Anaerolineae	Anaerolineales	Anaerolineaceae	0	0	0	0.000224652	0	0	0	0	0	0	0	0
1480	Bacteria	Proteobacteria	Gammaproteobacteria	Beggiatoales	Beggiatoaceae	0	0	0	0.000174729	0	0	0	0	0	0	0.000684354	0
1481	Bacteria	Proteobacteria	Gammaproteobacteria	Arenicellales	Arenicellaceae	3.49479e-05	0	3.34088e-05	0	0	0	0	0	0	0	0	0
1482	Bacteria	Bacteroidota	Bacteroidia	Cytophagales	Spirosomaceae	0	0	0.000420951	0	0.000249062	0	0	0	0.000548379	0.00348542	0	0
1483	Bacteria	Proteobacteria	Gammaproteobacteria	Burkholderiales	Chitinibacteraceae	9.08646e-05	0	0.000105789	0.000274574	0.00105177	0	0	0	0	0	0.000280253	0
1484	Bacteria	Bdellovibrionota	Bdellovibrionia	Bdellovibrionales	Bdellovibrionaceae	0	0	0	0	0.000142624	0	0	0	0	0	0	0
1485	Bacteria	Chloroflexi	Anaerolineae	SBR1031	A4b	0	0	0	0	0	0	0.000220361	0	0	0	0	0
1486	Archaea	Nanoarchaeota	Nanoarchaeia	Woesearchaeales	Woesearchaeales	0	0	0	0	0	0	0	0	0	0	0	0
1487	Bacteria	Verrucomicrobiota	Omnitrophia	Omnitrophales	Omnitrophales	0	0	6.01359e-05	0	0	0	0	0	0	0	0	0
1488	Bacteria	Proteobacteria	Gammaproteobacteria	CCM19a	CCM19a	5.59167e-05	0	0.000254203	0	0	0	0	0	0.000829724	0	0	0
1489	Bacteria	Proteobacteria	Gammaproteobacteria	Enterobacterales	Morganellaceae	0	0	0	0	5.86029e-05	0	0	0	0	0	0	0
1490	Bacteria	Proteobacteria	Gammaproteobacteria	Gammaproteobacteria_Incertae_Sedis	Unknown_Family	0	0	0	0	0	0	0	0	0	0	0	0
1491	Bacteria	Bacteroidota	Bacteroidia	Cytophagales	Spirosomaceae	0	0	0.000377504	0	0.00251659	0	0	0	0	0	0	0
1492	Bacteria	Spirochaetota	Brevinematia	Brevinematales	Brevinemataceae	0	0	1.76316e-05	0	0	0	0	0	0.00112177	0.00223183	0.00363751	0
1493	Bacteria	Proteobacteria	Alphaproteobacteria	Micavibrionales	Micavibrionaceae	0	0	3.34088e-05	0	0	0	0	0	0	0	0.000254312	0
1494	Bacteria	Firmicutes	Clostridia	Clostridia	Hungateiclostridiaceae	0	0	0	0	0	0	0	0	8.14916e-05	0	0.000208073	0
1495	Archaea	Halobacterota	Methanosarcinia	Methanosarciniales	Methanosarcinaceae	0	0.000237885	0	0	0	0	0	0	0	0	0.000380518	0
1496	Bacteria	Proteobacteria	Gammaproteobacteria	Burkholderiales	Neisseriaceae	0.000111833	0	0	0	0	0.000518914	0	0	0.000337747	0	0.000985054	0
1497	Archaea	Nanoarchaeota	Nanoarchaeia	Woesearchaeales	SCGC_AAA011-D5	1.39792e-05	0	0	0	0	0	0	0	0.00044262	0.00184778	0	0
1498	Bacteria	Proteobacteria	Alphaproteobacteria	Rickettsiales	Mitochondria	0	0	0	0	0	0	0	0	0.000528637	0	0	0
1499	Bacteria	Fibrobacterota	Fibrobacteria	Fibrobacterales	Fibrobacteraceae	0	0	0.000108944	0	0	0	0	0	0	0	0	0
1500	Bacteria	Bacteroidota	Bacteroidia	Sphingobacteriales	AKYH767	6.98959e-05	0	0	0	0.000186508	0	0	0	0	0	0	0
1501	Bacteria	Proteobacteria	Alphaproteobacteria	Rickettsiales	Rickettsiaceae	0	0	6.68177e-05	0	0	0	0	0	0.000339577	0.0030939	0	0
1502	Bacteria	Proteobacteria	Gammaproteobacteria	Diplorickettsiales	Diplorickettsiaceae	0	0	0	0	0	0	0	0	0.000648706	0.001341	0	0.000499962
1503	Bacteria	Gemmatimonadota	Gemmatimonadetes	Gemmatimonadales	Gemmatimonadaceae	0	0	4.67724e-05	0	0	0	0	0	0.00128209	0.000906682	0.00110181	0
1504	Bacteria	Bacteroidota	Bacteroidia	Sphingobacteriales	NS11-12_marine_group	0.000626566	0.00120048	0	0	0	0	0	0	0	0	0	0
1505	Bacteria	Bacteroidota	Bacteroidia	Flavobacteriales	Crocinitomicaceae	0	0.000733627	0	0	0	0	0	0	0	0	0	0
1506	Bacteria	Chloroflexi	Anaerolineae	SBR1031	SBR1031	0	0.000407803	0	0	0	0	0	0	0.0016294	0	0.0134657	0
1507	Bacteria	Firmicutes	Negativicutes	Veillonellales-Selenomonadales	Sporomusaceae	0	0	0	0	5.86029e-05	0	0	0	0.00142685	0.00453341	0.00557348	0.00283332
1508	Bacteria	Proteobacteria	Alphaproteobacteria	Sphingomonadales	Sphingomonadaceae	0	0	0.000391986	0	0	0	0	0	0	0	0	0
1509	Bacteria	Proteobacteria	Alphaproteobacteria	Rickettsiales	Mitochondria	0	0	1.76316e-05	0	0	0	0	0	0	0	0.000298676	0
1510	Bacteria	Patescibacteria	Parcubacteria	Parcubacteria	Parcubacteria	0	0	0	0	0	0	0	0	0.000982957	0	0	0
1511	Bacteria	Proteobacteria	Alphaproteobacteria	Rickettsiales	Rickettsiales	0	0	0.000106908	0	0	0	0	0	0	0	0	0
1512	Bacteria	Patescibacteria	Microgenomatia	Candidatus_Beckwithbacteria	Candidatus_Beckwithbacteria	0	0.000169918	0	0	0	0	0	0	0	0	0	0
1513	Bacteria	Proteobacteria	Alphaproteobacteria	Rhodospirillales	uncultured	0	0	4.00906e-05	0	0	0	0	0	0	0	0	0
1514	Archaea	Iainarchaeota	Iainarchaeia	Iainarchaeales	Iainarchaeales	0	0	5.44722e-05	0	0	0	0	0	0	0	0	0
1515	Bacteria	Bdellovibrionota	Oligoflexia	0319-6G20	0319-6G20	0.000503292	0	0.000220498	0.000524188	0	0	0	0	0	0	0	0
1516	Bacteria	Bacteroidota	Bacteroidia	Bacteroidales	Marinilabiliaceae	0	0	0	0.000299536	0	0	0	0	0	0	0.000221969	0
1517	Bacteria	Proteobacteria	Gammaproteobacteria	Methylococcales	Methylohalobiaceae	0.000698959	0.000237885	0.000586546	0	0	0	0	0	0	0	0	0
1518	Bacteria	Campilobacterota	Campylobacteria	Campylobacterales	Arcobacteraceae	0.000238846	0	0	0	0	0	0	0	0.00122665	0	0	0
1519	Bacteria	Patescibacteria	Gracilibacteria	JGI_0000069-P22	JGI_0000069-P22	0	0	0.000123421	0	0.000175809	0	0	0	0	0	0	0
1520	Bacteria	Chloroflexi	Anaerolineae	SBR1031	SBR1031	0	0	0	7.48839e-05	0	0	0	0	0	0	0	0
1521	Bacteria	Proteobacteria	Alphaproteobacteria	Sphingomonadales	Sphingomonadaceae	0	0	0	0	0	0	0	0	0.000493736	0.0012545	0	0
1522	Bacteria	Cyanobacteria	Cyanobacteriia	Oxyphotobacteria_Incertae_Sedis	Unknown_Family	0	0	0	0	0	0	0	0	0.00259373	0	0.00381145	0.0026506
1523	Bacteria	Proteobacteria	Alphaproteobacteria	Kiloniellales	Kiloniellaceae	0	0	0	0	4.38842e-05	0	0	0	0.00029337	0	0.00200672	0
1524	Bacteria	Gemmatimonadota	S0134_terrestrial_group	S0134_terrestrial_group	S0134_terrestrial_group	0	0	0.000108944	0	0	0	0	0	0.000323492	0	0.000972394	0
1525	Bacteria	Bdellovibrionota	Oligoflexia	Silvanigrellales	Silvanigrellaceae	0	0	7.34994e-05	0	0	0	0	0	8.51296e-05	0	0	0
1526	Bacteria	Verrucomicrobiota	Verrucomicrobiae	Verrucomicrobiales	Rubritaleaceae	0	0	0	0	0	0	0.000881446	0	0	0	0	0
1527	Bacteria	Firmicutes	Clostridia	Clostridiales	Caloramatoraceae	0	0	6.01359e-05	0	0	0	0	0	0.000451696	0	0	0
1528	Bacteria	Proteobacteria	Alphaproteobacteria	Rhizobiales	A0839	0	0	0	0	0.000272283	0	0	0	0	0	0	0
1529	Bacteria	Bacteroidota	Bacteroidia	Cytophagales	Amoebophilaceae	0	0	0	0	0.000489709	0	0	0	0.000629959	0	0	0
1530	Bacteria	Acidobacteriota	Holophagae	Acanthopleuribacterales	Acanthopleuribacteraceae	2.79583e-05	0	0.00038109	7.48839e-05	0	0	0	0	0	0	0	0
1531	Bacteria	NB1-j	NB1-j	NB1-j	NB1-j	0	0.000237885	0	0	0	0	0	0	0	0	0	0
1532	Bacteria	Verrucomicrobiota	Omnitrophia	Omnitrophales	Omnitrophales	0	0	0	0	0	0	0	0	0	0	0	0
1533	Archaea	Euryarchaeota	Thermococci	Methanofastidiosales	uncultured	0	0	0	7.48839e-05	0	0	0	0	0	0	0	0
1534	Bacteria	Proteobacteria	Gammaproteobacteria	Burkholderiales	TRA3-20	0	0	6.68177e-05	0	0	0	0	0	0.000660352	0	0	0
1535	Bacteria	Bacteroidota	Bacteroidia	Chitinophagales	Saprospiraceae	0	0	0	0	8.79044e-05	0	0.000605994	0	0	0	0	0
1536	Bacteria	Proteobacteria	Gammaproteobacteria	Ectothiorhodospirales	Ectothiorhodospiraceae	0	0	0	0	0	0	0	0	0.000209636	0	0	0
1537	Bacteria	Firmicutes	Bacilli	Ambiguous_taxa	Ambiguous_taxa	0.000202698	0	0	0	0	0.0119869	0	0	0	0	0.000761035	0
1538	Bacteria	Desulfobacterota	Desulfovibrionia	Desulfovibrionales	Desulfovibrionaceae	0	0	0	0.000299536	0	0	0	0	0	0	0	0
1539	Bacteria	Bdellovibrionota	Oligoflexia	Silvanigrellales	Silvanigrellaceae	0.00207591	0	0.00112471	0	0.000175537	0	0	0	0	0	0	0
1540	Bacteria	Proteobacteria	Gammaproteobacteria	211ds20	211ds20	0	0	4.00906e-05	0	0	0	0	0	0	0	0	0
1541	Bacteria	Bacteroidota	Bacteroidia	Chitinophagales	Saprospiraceae	0	0	0	0	0	0	0	0	0	0	0	0
1542	Bacteria	Proteobacteria	Alphaproteobacteria	Sphingomonadales	Sphingomonadaceae	4.19375e-05	0	0	0	0	0	0	0	0	0	0	0
1543	Bacteria	Proteobacteria	Gammaproteobacteria	Burkholderiales	Gallionellaceae	0	0	0	0	0	0	0	0	0.00154025	0.00167387	0.00381939	0.00128301
1544	Bacteria	Bdellovibrionota	Bdellovibrionia	Bdellovibrionales	Bdellovibrionaceae	0	0	0	0	0	0	0	0	0	0	0	0
1545	Bacteria	Bacteroidota	Bacteroidia	Flavobacteriales	Flavobacteriaceae	0	0	3.52631e-05	0	0	0	0	0	0.000255408	0	0	0
1546	Bacteria	Dependentiae	Babeliae	Babeliales	Babeliales	0	0	0	0	0	0	0	0	0	0	0	0
1547	Bacteria	Verrucomicrobiota	Omnitrophia	Omnitrophales	Omnitrophales	0	0	0	0.000249613	0	0	0	0	0	0	0	0
1548	Bacteria	Desulfobacterota	Desulfobacteria	Desulfobacterales	Desulfobacteraceae	0	0.000118942	0	0	0	0	0	0	0	0	0	0
1549	Bacteria	Proteobacteria	Gammaproteobacteria	Thiotrichales	Thiotrichaceae	0	0	0	0	0	0	0	0	0	0	0	0
1550	Bacteria	Firmicutes	Clostridia	Lachnospirales	Lachnospiraceae	0	0	2.00453e-05	0	0	0	0	0	0	0	0	0
1551	Bacteria	Desulfobacterota	Desulfobacteria	Desulfatiglandales	Desulfatiglandaceae	0	0	0	0	0	0	0	0	0	0	0	0
1552	Archaea	Nanoarchaeota	Nanoarchaeia	Woesearchaeales	SCGC_AAA011-D5	0	0	0	0	0	0	0	0	0.00016305	0	0	0
1553	Bacteria	Verrucomicrobiota	Omnitrophia	Omnitrophales	Omnitrophaceae	0	0	2.67271e-05	0	0	0	0	0	0.00300591	0	0	0
1554	Bacteria	Bdellovibrionota	Bdellovibrionia	Bacteriovoracales	Bacteriovoracaceae	0	0	0	0	0	0	0.000330542	0	0	0.00320826	0.000796664	0.0194156
1555	Bacteria	Proteobacteria	Gammaproteobacteria	Burkholderiales	Oxalobacteraceae	0.000111833	0	0	0	0	0	0	0	0	0	0	0
1556	Bacteria	Desulfobacterota	Desulfobulbia	Desulfobulbales	uncultured	0	0.000169918	0	0	0	0	0	0	0.000128111	0	0	0
1557	Bacteria	Bacteroidota	Bacteroidia	Cytophagales	Cyclobacteriaceae	0	0	0.000220394	0	0	0	0	0	0	0	0	0
1558	Bacteria	Bdellovibrionota	Oligoflexia	0319-6G20	0319-6G20	0	0	0	0.000274574	0	0	0	0	9.77899e-05	0	0	7.69172e-05
1559	Bacteria	Myxococcota	Polyangia	Polyangiales	Sandaracinaceae	0.000125813	0	0.000435777	0	0.000306692	0	0	0	0	0	0	0
1560	Bacteria	Proteobacteria	Alphaproteobacteria	Rhodobacterales	Rhodobacteraceae	0	0	0.00123554	0.00137287	0.00214331	0	0	0	0.00254709	0	0.000364329	0.000481129
1561	Bacteria	Planctomycetota	vadinHA49	vadinHA49	vadinHA49	0.000231748	0	0	0	0.000680205	0	0.000330542	0	0.0013337	0	0.00989998	0
1562	Bacteria	Aquificota	Aquificae	Aquificales	Aquificaceae	6.98959e-05	0	0	0	0.000307189	0.000259457	0	0	0.00140997	0.00174362	0	0
1563	Bacteria	Proteobacteria	Alphaproteobacteria	Rickettsiales	Rickettsiaceae	0	0	0	0.000174729	0	0	0	0	0.00128774	0	0.00195666	0.00315407
1564	Bacteria	Verrucomicrobiota	Verrucomicrobiae	Pedosphaerales	Pedosphaeraceae	0	0	0	0	0	0	0	0	0	0	0	0
1565	Bacteria	SAR324_clade(Marine_group_B)	SAR324_clade(Marine_group_B)	SAR324_clade(Marine_group_B)	SAR324_clade(Marine_group_B)	0	0	0	0	0	0	0	0	0	0	0	0
1566	Bacteria	Proteobacteria	Alphaproteobacteria	Rhizobiales	Rhizobiales_Incertae_Sedis	0	0	0	0	0	0	0	0	0	0	0	0
1567	Bacteria	Proteobacteria	Gammaproteobacteria	Diplorickettsiales	Diplorickettsiaceae	0	0	0	0	0.00033063	0.000674589	0	0	0	0	0	0
1568	Archaea	Nanoarchaeota	Nanoarchaeia	Woesearchaeales	GW2011	0	0	0	0	8.77684e-05	0	0	0	0	0	0	0
1569	Bacteria	Proteobacteria	Alphaproteobacteria	Caedibacterales	Caedibacteraceae	0	0	0	0.000149768	0	0	0	0	0	0	0.00138373	0
1570	Bacteria	Proteobacteria	Gammaproteobacteria	Pseudomonadales	Pseudomonadaceae	0	0	0	0	0	0	0	0	0	0	0	0
1571	Bacteria	Proteobacteria	Alphaproteobacteria	Micavibrionales	Micavibrionaceae	0	0	0.000123421	0	0.000186508	0	0.000385632	0	0.00133659	0	0.00202285	0
1572	Bacteria	Proteobacteria	Alphaproteobacteria	Rhizobiales	Hyphomicrobiaceae	0	0.000441786	0	0	0	0	0	0	0	0	0	0
1573	Bacteria	Cyanobacteria	Cyanobacteriia	Cyanobacteriales	Cyanobacteriaceae	0	0	0	0	8.79044e-05	0	0	0	0.0109972	0.00523651	0.000980887	0.00128301
1574	Bacteria	Proteobacteria	Alphaproteobacteria	Micavibrionales	uncultured	9.08646e-05	0	0.000161657	0	0.000394958	0	0	0	0.000220027	0	0	0
1575	Bacteria	Bdellovibrionota	Bdellovibrionia	Bdellovibrionales	Bdellovibrionaceae	0	0	0	0	0	0	0	0	0	0	0	0
1576	Bacteria	Bdellovibrionota	Oligoflexia	Silvanigrellales	Silvanigrellaceae	0	0	0.000284211	0	0	0	0	0	0.000476726	0	0	0
1577	Bacteria	Proteobacteria	Gammaproteobacteria	Burkholderiales	Comamonadaceae	0	0.00106709	0	0	0	0	0	0	0	0	0	0
1578	Bacteria	Proteobacteria	Alphaproteobacteria	Rhizobiales	A0839	0	0	0.000265592	0	0.000249062	0.00114161	0.00181798	0	0	0	0	0
1579	Bacteria	Bacteroidota	Bacteroidia	Cytophagales	Microscillaceae	0	0	1.76316e-05	0	0	0	0	0	0	0	0	0
1580	Archaea	Micrarchaeota	Micrarchaeia	Micrarchaeales	CG1-02-32-21	2.09688e-05	0	0	0	0	0	0	0	0	0	0	0
1581	Bacteria	Proteobacteria	Alphaproteobacteria	Sphingomonadales	Sphingomonadaceae	0.000517229	0.00203415	0	0.00107334	0.000274276	0	0.00126708	0	0	0	0.00107813	0
1582	Bacteria	Proteobacteria	Alphaproteobacteria	Rhodobacterales	Rhodobacteraceae	0	0	0.000282105	0.000923568	0.000584747	0	0	0	0	0	0.000786054	0
1583	Bacteria	Firmicutes	Bacilli	Paenibacillales	Paenibacillaceae	0	0	8.6863e-05	0	0	0	0	0	0	0	0	0
1584	Bacteria	Proteobacteria	Gammaproteobacteria	Xanthomonadales	Rhodanobacteraceae	0	0	3.52631e-05	0	0	0	0	0	0	0	0	0
1585	Bacteria	Bdellovibrionota	Oligoflexia	Oligoflexales	uncultured	1.39792e-05	0	0	0	0	0	0	0	0	0	0	0
1586	Bacteria	Firmicutes	Bacilli	Erysipelotrichales	Erysipelotrichaceae	0	0	0	0	0.000155591	0	0	0	0.000792194	0	0	0
1587	Bacteria	Bacteroidota	Bacteroidia	Bacteroidales	Bacteroidales_UCG-001	7.68854e-05	0	0	0	0	0	0	0	0	0	0	0
1588	Archaea	Nanoarchaeota	Nanoarchaeia	Woesearchaeales	SCGC_AAA011-D5	0	0	0	0	3.29131e-05	0	0	0	2.32929e-05	0	0	0
1589	Bacteria	Acidobacteriota	Blastocatellia	2025-11-24	2025-11-24	0	0	5.44722e-05	0.000399381	0	0	0	0	0	0	0	0
1590	Bacteria	Proteobacteria	Gammaproteobacteria	UBA10353_marine_group	UBA10353_marine_group	0	0	0	0	0	0	0	0	0	0	0	0
1591	Bacteria	Proteobacteria	Gammaproteobacteria	Legionellales	Legionellaceae	0	0	0.000650058	0	0	0	0	0	0	0	0	0
1592	Bacteria	Myxococcota	Polyangia	Haliangiales	Haliangiaceae	0	0	0	0	0	0	0	0	0	0	0	0
1593	Bacteria	Bdellovibrionota	Oligoflexia	Oligoflexales	uncultured	6.98959e-05	0	0.000684325	0	0	0.000934046	0	0	0	0	0	7.69172e-05
1594	Bacteria	Bacteroidota	Bacteroidia	Chitinophagales	Chitinophagaceae	0	0	0	0	0	0.00103783	0.000661084	0	0.000918404	0	0	0
1595	Bacteria	Proteobacteria	Alphaproteobacteria	Rickettsiales	SM2D12	0	0	0	0	0.000136142	0	0	0	0	0	0	0
1596	Archaea	Crenarchaeota	Nitrososphaeria	Nitrososphaerales	Nitrososphaeraceae	0	0	0	0	0	0	0	0	0	0	0	0
1597	Bacteria	Myxococcota	Polyangia	VHS-B3-70	VHS-B3-70	0	0	0	0	0	0	0	0	0	0	0	0
1598	Bacteria	Bacteroidota	Bacteroidia	Bacteroidales	SB-5	0	0	0	0.000299536	0	0	0	0	0	0	0	0
1599	Bacteria	Planctomycetota	Phycisphaerae	Phycisphaerales	Phycisphaeraceae	0	0.000220893	0	0	0	0	0	0	0.000302808	0	0	0
1600	Bacteria	Proteobacteria	Gammaproteobacteria	Diplorickettsiales	Diplorickettsiaceae	0	0	0	0	0	0	0	0	0	0	0	0.00117609
1601	Bacteria	Myxococcota	Polyangia	mle1-27	mle1-27	0	0	0	0.000299536	0	0	0	0	0.00205359	0	0.0026028	0
1602	Bacteria	Firmicutes	Bacilli	Paenibacillales	Paenibacillaceae	0.00100315	0	0	0	0	0	0	0	0.00028362	0	0	0
1603	Bacteria	Bacteroidota	Bacteroidia	Sphingobacteriales	env.OPS_17	0.000629063	0	0.00173223	0.000823723	0.000493697	0	0.000826355	0	0	0	0	0
1604	Bacteria	Actinobacteriota	Thermoleophilia	Solirubrobacterales	67-14	0	0	5.34541e-05	0	0.000194488	0	0	0	0	0	0	0
1605	Archaea	Altiarchaeota	Altiarchaeia	Altiarchaeales	Altiarchaeaceae	0	0	0	9.98452e-05	0	0	0	0	0.00127232	0	0.00131918	0
1606	Bacteria	Planctomycetota	Planctomycetes	Pirellulales	Pirellulaceae	0	0	4.40789e-05	0	0	0	0	0	0	0	0	0
1607	Bacteria	Bacteroidota	Bacteroidia	Bacteroidales	SB-5	0	0	0	0.000424342	0	0	0	0	0	0	0	0
1608	Bacteria	Dependentiae	Babeliae	Babeliales	Babeliales	0	0	4.00906e-05	0	0	0	0	0	0	0	0	0
1609	Bacteria	Nitrospirota	Nitrospiria	Nitrospirales	Nitrospiraceae	0	0	0	0	0.000778944	0	0.00203834	0	0	0	0	0
1610	Bacteria	Myxococcota	Myxococcia	Myxococcales	Myxococcaceae	0	0	0	0	0	0	0.000385632	0	0.000200707	0	0	0
1611	Bacteria	Spirochaetota	Spirochaetia	Spirochaetales	Spirochaetaceae	0	0	2.64473e-05	0	0	0	0	0	0.000909366	0	0.000231192	0
1612	Bacteria	Proteobacteria	Gammaproteobacteria	Legionellales	Legionellaceae	0	0	0	0	0	0.00103783	0	0	0	0	0	0
1613	Bacteria	Cyanobacteria	Sericytochromatia	Sericytochromatia	Sericytochromatia	0	0	5.28947e-05	0	2.93015e-05	0	0	0	0	0	0	0
1614	Bacteria	Proteobacteria	Alphaproteobacteria	Rickettsiales	SM2D12	0	0	0	0	5.48552e-05	0	0	0	0	0	0	0
1615	Bacteria	Bacteroidota	Bacteroidia	Bacteroidales	Prolixibacteraceae	0	0	0.000254203	0	0	0	0	0	0	0	0	0
1616	Bacteria	Bacteroidota	Bacteroidia	Bacteroidales	Dysgonomonadaceae	0	0	0	0	0.000233386	0	0	0	0	0	0	0
1617	Bacteria	Myxococcota	Polyangia	Polyangiales	BIrii41	0	0	0	0	0.000153595	0	0	0	0	0	0	0
1618	Bacteria	Proteobacteria	Alphaproteobacteria	Rickettsiales	Rickettsiaceae	0	0	0	0	7.67973e-05	0	0	0	0	0	0	0
1619	Bacteria	Proteobacteria	Alphaproteobacteria	Rickettsiales	SM2D12	0	0	0	0	0	0	0	0	0.000358563	0.000836937	0.000508623	0
1620	Bacteria	Bdellovibrionota	Oligoflexia	Silvanigrellales	Silvanigrellaceae	0	0	0	0	0	0	0	0	0	0	0	0
1621	Bacteria	Margulisbacteria	Margulisbacteria	Margulisbacteria	Margulisbacteria	0	0	0	0.000124807	0	0	0	0	0	0	0	0
1622	Bacteria	Bacteroidota	Bacteroidia	Cytophagales	Spirosomaceae	0.000195708	0	0	0	0	0	0	0	0	0	0	0
1623	Bacteria	Verrucomicrobiota	Chlamydiae	Chlamydiales	Simkaniaceae	0.000296687	0	0	0	0	0	0	0	0	0	0.000856164	0
1624	Bacteria	Proteobacteria	Alphaproteobacteria	uncultured	uncultured	0	0	0.000132237	0	0	0	0	0	0	0	0	0
1625	Bacteria	Dependentiae	Babeliae	Babeliales	Vermiphilaceae	0	0	0.00032174	0	0	0	0	0	0	0	0	0
1626	Bacteria	Bacteroidota	Bacteroidia	Cytophagales	Microscillaceae	0	0	0	0.000174729	0	0	0	0	0.00160517	0	0	0
1627	Bacteria	Proteobacteria	Gammaproteobacteria	Oceanospirillales	Pseudohongiellaceae	0	0	0	0	0	0	0	0	0	0	0	0
1628	Bacteria	Actinobacteriota	Acidimicrobiia	Microtrichales	Ilumatobacteraceae	0	0	0	0	0	0	0	0	0	0	0	0
1629	Bacteria	Proteobacteria	Gammaproteobacteria	Burkholderiales	Methylophilaceae	0.000146781	0	0.00396584	0.00147272	0.000524012	0.000311349	0	0	0	0	0	0
1630	Bacteria	Proteobacteria	Alphaproteobacteria	Rhizobiales	Hyphomicrobiaceae	0	0	0	0	0	0	0	0	0	0	0	0
1631	Bacteria	Proteobacteria	Alphaproteobacteria	Rickettsiales	Mitochondria	2.09688e-05	0	0	0	0	0	0	0	0.000203729	0	0	0
1632	Bacteria	Proteobacteria	Gammaproteobacteria	BD7-8	BD7-8	0	0	0	0	0	0	0	0	0	0	0	0
1633	Bacteria	Actinobacteriota	Actinobacteria	Frankiales	Sporichthyaceae	0	0	0.000140317	0	0	0	0	0	0	0	0	0
1634	Bacteria	Proteobacteria	Gammaproteobacteria	Acidiferrobacterales	Acidiferrobacteraceae	0	0	0	0.000174729	0	0	0	0	0	0	0	0
1635	Bacteria	Cyanobacteria	Cyanobacteriia	Chloroplast	Chloroplast	0	0	0	0	0	0.000467023	0	0	0	0	0	0
1636	Bacteria	Cyanobacteria	Cyanobacteriia	Chloroplast	Chloroplast	0	0	0	7.48839e-05	0	0	0	0	6.81037e-05	0	0	0
1637	Bacteria	Bdellovibrionota	Bdellovibrionia	Bacteriovoracales	Bacteriovoracaceae	2.09688e-05	0	0	0	0	0	0	0	0	0	0	0
1638	Bacteria	Bacteroidota	Bacteroidia	Bacteroidales	Ambiguous_taxa	0	0	0	0.000124807	0	0	0	0	5.82323e-05	0	0	0
1639	Bacteria	Sva0485	Sva0485	Sva0485	Sva0485	0	0	0	0	0	0	0	0	0	0	0	0
1640	Bacteria	Proteobacteria	Gammaproteobacteria	Methylococcales	Methylococcaceae	8.3875e-05	0	0	0.00019969	0	0	0	0	0	0	0	0
1641	Bacteria	Cyanobacteria	Cyanobacteriia	Chloroplast	Chloroplast	0	0	0	0	0	0.00171242	0	0	0.0015924	0	0	0
1642	Bacteria	Firmicutes	TSAC18	TSAC18	TSAC18	0	0	6.01359e-05	0	0	0	0	0	0	0	0	0
1643	Bacteria	Firmicutes	Bacilli	Exiguobacterales	Exiguobacteraceae	0	0	9.69735e-05	0.000299536	0	0.00996316	0	0	0	0	0	0
1644	Bacteria	Proteobacteria	Alphaproteobacteria	Caulobacterales	Hyphomonadaceae	0	0	0	0	0	0	0	0	0	0	0	0
1645	Bacteria	Proteobacteria	Gammaproteobacteria	Burkholderiales	TRA3-20	0	0	0	0.000299536	0	0	0	0	0	0	0	0
1646	Bacteria	Methylomirabilota	Methylomirabilia	Methylomirabilales	Methylomirabilaceae	0	0	2.64473e-05	0	0	0	0	0	0	0	0	0
1647	Bacteria	Proteobacteria	Gammaproteobacteria	Burkholderiales	Comamonadaceae	0	0.000833667	0	0	0	0	0	0	0	0	0	0
1648	Bacteria	Proteobacteria	Gammaproteobacteria	Gammaproteobacteria_Incertae_Sedis	Unknown_Family	0	0	7.34994e-05	0	0	0	0	0	0.000138536	0	0	0
1649	Bacteria	Armatimonadota	uncultured	uncultured	uncultured	0	0	0	0	2.19421e-05	0	0	0	0	0	0	0
1650	Bacteria	Proteobacteria	Gammaproteobacteria	Acidiferrobacterales	Acidiferrobacteraceae	0.0003355	0	0.000562879	0.00102341	0	0.000934046	0.00143235	0	0	0	0	0
1651	Bacteria	Myxococcota	Myxococcia	Myxococcales	Myxococcaceae	0	0	7.34994e-05	0	0	0	0	0	0.00116558	0	0.000532481	0
1652	Bacteria	Bdellovibrionota	Oligoflexia	0319-6G20	0319-6G20	0	0.000101951	0	0	0	0	0	0	0.000714506	0	0	0
1653	Bacteria	Bacteroidota	Bacteroidia	Sphingobacteriales	env.OPS_17	0	0	0	0.000349458	0	0	0	0	0.000151404	0	0	0
1654	Bacteria	Desulfobacterota	Desulfovibrionia	Desulfovibrionales	Desulfovibrionaceae	0	0	0	0	0	0	0	0	0	0	0	0
1655	Bacteria	Dependentiae	Babeliae	Babeliales	Vermiphilaceae	0	0	1.33635e-05	0	0	0	0	0	0	0	0	0
1656	Bacteria	Patescibacteria	Saccharimonadia	Saccharimonadales	Saccharimonadales	0	0	0	0	0	0	0	0	0	0	0	0
1657	Bacteria	Patescibacteria	Parcubacteria	Candidatus_Nomurabacteria	Candidatus_Nomurabacteria	0	0	0	0	0	0	0	0	0.00097153	0	0.000786054	0
1658	Archaea	Crenarchaeota	Nitrososphaeria	Nitrosopumilales	Nitrosopumilaceae	0	0.000424794	0	0	0	0	0	0	0.000200707	0	0.000602486	0
1659	Bacteria	Bdellovibrionota	Oligoflexia	0319-6G20	0319-6G20	0	0	0.000105789	0	0	0	0	0	0	0	0.000716697	0
1660	Bacteria	Fusobacteriota	Fusobacteriia	Fusobacteriales	Leptotrichiaceae	0	0	0	0	0	0	0	0	0	0	0	0
1661	Archaea	Nanoarchaeota	Nanoarchaeia	Woesearchaeales	GW2011_GWC1_47_15	0	0	3.52631e-05	0	0	0	0	0	0	0	0	0
1662	Bacteria	Firmicutes	Clostridia	Oscillospirales	Ruminococcaceae	0	0	0	0	0.000116693	0	0	0	0	0	0	0
1663	Bacteria	Bacteroidota	Bacteroidia	Cytophagales	Cyclobacteriaceae	0	0	7.9342e-05	0	0	0	0	0	0	0	0	0
1664	Bacteria	Spirochaetota	Spirochaetia	Spirochaetales	Spirochaetaceae	0	0	0	0	7.32536e-05	0	0	0	0.00199827	0	0.00202943	0
1665	Bacteria	Proteobacteria	Gammaproteobacteria	Gammaproteobacteria_Incertae_Sedis	Unknown_Family	0	0	0	0	0	0	0	0	0	0	0	0
1666	Archaea	Crenarchaeota	Bathyarchaeia	Bathyarchaeia	Bathyarchaeia	5.59167e-05	0	0	0	0	0	0	0	0	0	0	0
1667	Bacteria	Myxococcota	bacteriap25	bacteriap25	bacteriap25	0	0	0	0	2.93015e-05	0	0	0	0	0	0	0
1668	Bacteria	Campilobacterota	Campylobacteria	Campylobacterales	Arcobacteraceae	0.000354146	0	0	0	0	0	0	0	0	0	0	0
1669	Bacteria	Myxococcota	Polyangia	Blfdi19	Blfdi19	0	0	0	0	0	0	0	0	0	0	0	0
1670	Bacteria	Planctomycetota	BD7-11	BD7-11	BD7-11	0	0	0	0	0	0	0	0	8.51296e-05	0	0	0
1671	Bacteria	Acidobacteriota	Vicinamibacteria	Subgroup_9	Subgroup_9	0	0	0	0.000224652	0	0	0	0	0.000244475	0	0	0
1672	Bacteria	Proteobacteria	Alphaproteobacteria	Rickettsiales	Mitochondria	0	0	2.67271e-05	0	0	0	0	0	0	0	0	0
1673	Bacteria	Planctomycetota	Planctomycetes	Pirellulales	Pirellulaceae	0	0.000101951	0	0	0	0	0	0	0	0	0	0
1674	Bacteria	Firmicutes	Bacilli	Erysipelotrichales	Erysipelotrichaceae	2.79583e-05	0	0	0	0	0	0	0	0	0	0	0
1675	Bacteria	Verrucomicrobiota	Verrucomicrobiae	Chthoniobacterales	Chthoniobacteraceae	0	0	0	0	0	0	0	0	0.00048895	0	0	0.000588047
1676	Bacteria	Proteobacteria	Gammaproteobacteria	Diplorickettsiales	Diplorickettsiaceae	0	0	0	0	0	0	0	0	9.77899e-05	0	0	0
1677	Archaea	Nanoarchaeota	Nanoarchaeia	Woesearchaeales	Woesearchaeales	0	0	0	7.48839e-05	0	0	0	0	0	0	0	0
1678	Bacteria	Bacteroidota	Bacteroidia	Flavobacteriales	Flavobacteriaceae	0.000217936	0	0	0	0	0	0	0	0.00206175	0	0	0
1679	Bacteria	Patescibacteria	Parcubacteria	Candidatus_Nomurabacteria	Candidatus_Nomurabacteria	6.98959e-05	0	0	0	0	0	0	0	0	0	0	0
1680	Bacteria	Cyanobacteria	Cyanobacteriia	Chloroplast	Chloroplast	0	0	0.00128602	0	0	0	0	0	0	0	0	0
1681	Archaea	Euryarchaeota	Thermococci	Methanofastidiosales	uncultured	1.39792e-05	0	0	0	0	0	0	0	0	0	0	0
1682	Bacteria	Myxococcota	Polyangia	Polyangiales	BIrii41	7.68854e-05	0	0	0	0	0	0	0	0	0	0	0
1683	Bacteria	Verrucomicrobiota	Omnitrophia	Omnitrophales	Omnitrophaceae	0	0	0	0	0	0	0	0	0	0	0	0
1684	Bacteria	Proteobacteria	Gammaproteobacteria	Burkholderiales	Neisseriaceae	0	0	0	0	0	0	0	0	0	0	0	0
1685	Bacteria	Proteobacteria	Gammaproteobacteria	Pseudomonadales	Moraxellaceae	0	0	0.000160362	0	0	0.00160863	0	0	0	0	0	0.000908799
1686	Bacteria	Bacteroidota	Bacteroidia	Flavobacteriales	Flavobacteriaceae	0	0	0.000689981	0	0	0	0	0	0	0	0	0
1687	Bacteria	Proteobacteria	Alphaproteobacteria	Sphingomonadales	Sphingomonadaceae	0.000125813	0	0.000429993	0.000773801	0.00139246	0.00160863	0.00176289	0	0	0	0.00118188	0.000711881
1688	Bacteria	Bacteroidota	Bacteroidia	Sphingobacteriales	KD3-93	0	0	0.000744453	0	0	0	0	0	0	0	0	0
1689	Bacteria	Chloroflexi	Anaerolineae	Anaerolineales	Anaerolineaceae	0	0	0	0	0	0	0	0	0	0	0	0
1690	Bacteria	Proteobacteria	Gammaproteobacteria	Xanthomonadales	Rhodanobacteraceae	0	0	0	0.000224652	7.77953e-05	0	0	0	0	0	0	0
1691	Bacteria	Planctomycetota	Phycisphaerae	Phycisphaerales	Phycisphaeraceae	0	0	0	0.000149768	0	0	0	0	0.000104818	0	0	0
1692	Bacteria	Latescibacterota	Latescibacteria	Latescibacterales	Latescibacteraceae	0	0.00028886	0	0	0	0	0	0	0	0	0	0
1693	Bacteria	Proteobacteria	Gammaproteobacteria	Diplorickettsiales	Diplorickettsiaceae	0	0	0	0	0	0	0	0	0	0	0.00161205	0
1694	Bacteria	Bacteroidota	Kapabacteria	Kapabacteriales	Kapabacteriales	0	0	0	0	3.88976e-05	0	0	0	0	0	0	0
1695	Archaea	Nanoarchaeota	Nanoarchaeia	Woesearchaeales	Woesearchaeales	0	0	4.40789e-05	0	0	0	0	0	0	0	0	0
1696	Bacteria	Proteobacteria	Alphaproteobacteria	Rhizobiales	Hyphomicrobiaceae	0	0	0	0.000224652	0	0	0	0	0.000669928	0	0.00234906	0
1697	Bacteria	Proteobacteria	Gammaproteobacteria	Enterobacterales	Enterobacteriaceae	0	0	0	0	0	0.00238701	0.000826355	0	0.000590566	0	0.000595522	0.00141339
1698	Bacteria	Proteobacteria	Alphaproteobacteria	Rickettsiales	SM2D12	0	0	2.67271e-05	0	0	0	0	0	0	0	0	0
1699	Bacteria	Zixibacteria	Zixibacteria	Zixibacteria	Zixibacteria	0	0	0	0	0	0	0	0	0.000256222	0	0.000476431	0
1700	Bacteria	Proteobacteria	Gammaproteobacteria	Diplorickettsiales	Diplorickettsiaceae	0	0	0	0	0	0	0	0	0	0	0	0
1701	Bacteria	Acidobacteriota	Vicinamibacteria	Vicinamibacterales	Vicinamibacteraceae	0	0	0	0.00094853	0	0	0	0	0	0	0	0
1702	Bacteria	Chloroflexi	Ktedonobacteria	C0119	C0119	0	0	0	0.000299536	0	0	0	0	0.000782575	0	0	0
1703	Bacteria	Elusimicrobiota	Elusimicrobia	Lineage_IV	Lineage_IV	0	0	0	0.000349458	0	0	0	0	0	0	0	0
1704	Bacteria	Latescibacterota	Latescibacteria	Latescibacterales	Latescibacteraceae	0	0	0	0	0	0	0	0	0.000660712	0	0.00106496	0
1705	Bacteria	Patescibacteria	Gracilibacteria	JGI_0000069-P22	JGI_0000069-P22	0	0	0	0	0.000117206	0	0	0	0	0	0.000531743	0
1706	Bacteria	Proteobacteria	Gammaproteobacteria	Enterobacterales	Ambiguous_taxa	0	0	0	0	0	0	0	0	0	0	0	0
1707	Bacteria	Myxococcota	Polyangia	Blfdi19	Blfdi19	0	0	0	0	0	0.000467023	0.000385632	0	0	0	0	0
1708	Bacteria	Firmicutes	Clostridia	Oscillospirales	Oscillospiraceae	0	0	0	0	0	0	0	0	0	0	0	0
1709	Bacteria	Patescibacteria	Parcubacteria	Parcubacteria	Parcubacteria	0	0	0	0	0	0	0	0	0.000974686	0	0	0
1710	Bacteria	Chloroflexi	Anaerolineae	SBR1031	SBR1031	0	0	0	0.000399381	0	0	0	0	0	0	0.00181191	0
1711	Bacteria	Armatimonadota	Fimbriimonadia	Fimbriimonadales	Fimbriimonadaceae	0	0	0.000152497	0	0.000388976	0	0	0	0	0	0	0
1712	Bacteria	Bacteroidota	Bacteroidia	Cytophagales	Hymenobacteraceae	0	0	0	0	0	0	0	0	0	0	0	0
1713	Bacteria	Verrucomicrobiota	Chlamydiae	Chlamydiales	Simkaniaceae	0	0	3.34088e-05	0	0	0	0	0	0.000399309	0.000906682	0	0
1714	Bacteria	Planctomycetota	Planctomycetes	Planctomycetales	Gimesiaceae	0	0	0	0	0	0	0	0	0.000357544	0	0.000346789	0
1715	Bacteria	Bacteroidota	Bacteroidia	Bacteroidales	Dysgonomonadaceae	0	0	2.67271e-05	0	0	0	0	0	0.000171132	0	0	0
1716	Bacteria	Acidobacteriota	Holophagae	Subgroup_7	Subgroup_7	0	0.000152926	0	0	0	0	0	0	0.000130387	0	0	0
1717	Bacteria	Planctomycetota	OM190	OM190	OM190	0	0	2.67271e-05	0	0	0	0	0	0	0	0	0
1718	Bacteria	Verrucomicrobiota	Omnitrophia	Omnitrophales	Omnitrophaceae	0.000181729	0	0	0	0	0	0	0	0.00049281	0	0.00093534	0.00106918
1719	Bacteria	NB1-j	NB1-j	NB1-j	NB1-j	0	0	0	0	0	0	0	0	0.000151404	0.000627703	0	0
1720	Bacteria	Cyanobacteria	Cyanobacteriia	Leptolyngbyales	Leptolyngbyaceae	0	0	9.69735e-05	0.00037442	0	0	0	0	0.000286724	0	0.000439266	0
1721	Bacteria	Proteobacteria	Gammaproteobacteria	Enterobacterales	Enterobacteriaceae	0.000111833	0	0	0	0	0	0	0	0	0	0	0
1722	Bacteria	Patescibacteria	ABY1	Candidatus_Magasanikbacteria	Candidatus_Magasanikbacteria	0	0	0	0	4.39522e-05	0	0	0	0	0	0	0
1723	Bacteria	Proteobacteria	Alphaproteobacteria	Rhodospirillales	Rhodospirillaceae	2.09688e-05	0	0	0	0	0	0	0	0.000317817	0	0	0
1724	Bacteria	Proteobacteria	Alphaproteobacteria	Rickettsiales	SM2D12	0	0	0	0	0	0	0	0	0.000244475	0	0	0
1725	Bacteria	Firmicutes	Clostridia	Clostridiales	Clostridiaceae	0.000119423	0	0	0	0	0	0	0	0.000232929	0	0	0
1726	Bacteria	Spirochaetota	Spirochaetia	Spirochaetales	Spirochaetaceae	0	0	0	0	0	0	0	0	0	0	0	0
1727	Bacteria	Planctomycetota	Phycisphaerae	Phycisphaerales	AKAU3564_sediment_group	0	0	0	0	0	0	0	0	0	0	0	0
1728	Bacteria	Verrucomicrobiota	Omnitrophia	Omnitrophales	Omnitrophales	0	0	0	0	0	0	0	0	0	0	0	0
1729	Bacteria	Desulfobacterota	Desulfobacteria	Desulfobacterales	Desulfobacteraceae	0	0	0	0.000324497	0	0	0	0	0	0	0	0
1730	Bacteria	Myxococcota	bacteriap25	bacteriap25	bacteriap25	0	0	0	7.48839e-05	0	0	0	0	0	0	0	0
1731	Bacteria	Proteobacteria	Gammaproteobacteria	Burkholderiales	Hydrogenophilaceae	0	0.00143391	0	0	0	0	0	0	0	0	0	0
1732	Bacteria	Proteobacteria	Alphaproteobacteria	Rhodobacterales	Rhodobacteraceae	0	0	0	0	0	0	0	0	0	0	0	0
1733	Bacteria	Cyanobacteria	Vampirivibrionia	Vampirovibrionales	Vampirovibrionales	5.59167e-05	0	0	0	0	0	0	0	0.000104818	0	0	0.00106918
1734	Bacteria	WPS-2	WPS-2	WPS-2	WPS-2	0	0	0	7.48839e-05	0	0	0	0	0.000974794	0	0	0
1735	Bacteria	Bacteroidota	Bacteroidia	Flavobacteriales	Flavobacteriaceae	0	0	0	0	0.000136142	0	0	0	0	0	0	0
1736	Bacteria	Nitrospirota	Leptospirillia	Leptospirillales	Leptospirillaceae	0	0	0.000100227	0	3.29131e-05	0	0	0	0.000104818	0	0	0
1737	Bacteria	Chloroflexi	Anaerolineae	SBR1031	SBR1031	0	0	0	0	0	0.000155674	0	0	0	0	0	0
1738	Bacteria	Patescibacteria	Parcubacteria	Candidatus_Nomurabacteria	Candidatus_Nomurabacteria	0	0	3.34088e-05	0	0.000120682	0	0.000165271	0	0.00211177	0	0.00168152	0
1739	Bacteria	Campilobacterota	Campylobacteria	Campylobacterales	Sulfurovaceae	0	0	0	0.000299536	0	0	0	0	0	0	0	0
1740	Bacteria	Desulfobacterota	Desulfobacteria	Desulfatiglandales	Desulfatiglandaceae	0	0.000407803	0	0	0	0	0	0	0	0	0	0
1741	Bacteria	Verrucomicrobiota	Verrucomicrobiae	Pedosphaerales	Pedosphaeraceae	0	0	0	7.48839e-05	0	0	0	0	0	0	0	0
1742	Bacteria	Chloroflexi	Anaerolineae	Anaerolineales	Anaerolineaceae	0	0.00118942	0	0.000399381	0	0.000467023	0	0	0	0	0	0
1743	Bacteria	Bacteroidota	Bacteroidia	Chitinophagales	37-13	3.49479e-05	0	0	0	6.58263e-05	0	0	0	0	0	0	0
1744	Bacteria	Bdellovibrionota	Bdellovibrionia	Bdellovibrionales	Bdellovibrionaceae	0	0	5.34541e-05	0	0	0	0	0	0	0	0	0
1745	Bacteria	Proteobacteria	Alphaproteobacteria	Rhizobiales	Rhizobiaceae	0	0	0	0	0	0.00176431	0	0	0	0	0	0
1746	Bacteria	Bdellovibrionota	Bdellovibrionia	Bdellovibrionales	Bdellovibrionaceae	0	0	0	0	0	0	0	0	0	0	0	0
1747	Bacteria	Proteobacteria	Alphaproteobacteria	Kiloniellales	Fodinicurvataceae	0	0	4.67724e-05	0	0	0	0	0	0	0	0	0
1748	Bacteria	Firmicutes	Clostridia	Oscillospirales	Ruminococcaceae	0	0	0	0	0	0	0	0	0	0	0	0
1749	Bacteria	Proteobacteria	Alphaproteobacteria	Rickettsiales	SM2D12	0	0	0	0	0	0	0.000275452	0	0.000221337	0	0	0
1750	Bacteria	Bacteroidota	Bacteroidia	Bacteroidales	Williamwhitmaniaceae	0	0	0	0	3.29131e-05	0	0	0	0	0	0	0
1751	Bacteria	Proteobacteria	Alphaproteobacteria	uncultured	uncultured	0	0	0	0	0.000380919	0	0	0	0.00180777	0	0.000392355	0.00229873
1752	Bacteria	Proteobacteria	Gammaproteobacteria	Steroidobacterales	Woeseiaceae	0	0.000305852	0	0	0	0	0	0	0	0	0	0
1753	Bacteria	Spirochaetota	Leptospirae	Leptospirales	Leptospiraceae	0	0	0.00011359	0	0	0	0	0	0.000420555	0	0	0
1754	Bacteria	Firmicutes	Clostridia	Oscillospirales	Ruminococcaceae	0	0	0	0	5.83465e-05	0	0	0	0.000772379	0	0.000577981	0
1755	Bacteria	Myxococcota	Polyangia	Blfdi19	Blfdi19	0	0	0	0	0.000175537	0	0	0	0.000425794	0	0.000531743	0
1756	Bacteria	Proteobacteria	Alphaproteobacteria	Rhizobiales	Beijerinckiaceae	0	0	3.34088e-05	0	0	0	0	0	0	0	0.000475647	0
1757	Bacteria	Planctomycetota	BD7-11	BD7-11	BD7-11	0	0	0	0	0	0	0	0	0	0	0	0
1758	Bacteria	Bacteroidota	Bacteroidia	Flavobacteriales	Flavobacteriaceae	1.39792e-05	0	0	0	0	0	0	0	0	0	0	0
1759	Archaea	Nanoarchaeota	Nanoarchaeia	Woesearchaeales	SCGC_AAA011-D5	0	0	1.33635e-05	0	0	0	0	0	0	0	0	0
1760	Bacteria	Planctomycetota	vadinHA49	vadinHA49	vadinHA49	0	0	0	0	0	0	0	0	0	0	0	0
1761	Bacteria	Patescibacteria	Gracilibacteria	Gracilibacteria	Gracilibacteria	0	0	0	0	0	0	0	0	0	0	0	0
1762	Bacteria	Proteobacteria	Gammaproteobacteria	Burkholderiales	Nitrosomonadaceae	0	0	0	0.0010983	0	0.00103783	0	0	0	0	0	0
1763	Bacteria	Proteobacteria	Alphaproteobacteria	Rhodospirillales	uncultured	0	0	0	0	0	0	0	0	0	0	0	0
1764	Bacteria	Deinococcota	Deinococci	Deinococcales	Deinococcaceae	0	0	3.34088e-05	0	0	0	0	0	0	0	0	0
1765	Bacteria	Bdellovibrionota	Bdellovibrionia	Bdellovibrionales	Bdellovibrionaceae	0	0	0	0	5.83465e-05	0	0	0	0	0	0	0
1766	Bacteria	Patescibacteria	Gracilibacteria	Candidatus_Peregrinibacteria	Candidatus_Peregrinibacteria	0	0	3.34088e-05	0	0	0	0	0	0	0	0	0
1767	Bacteria	Proteobacteria	Gammaproteobacteria	Halothiobacillales	Halothiobacillaceae	0	0	3.34088e-05	0	0	0	0	0	3.40518e-05	0	0	0
1768	Bacteria	Armatimonadota	Fimbriimonadia	Fimbriimonadales	Fimbriimonadaceae	0	0	0	0	0	0	0	0	5.10777e-05	0.000209234	0	0
1769	Bacteria	Methylomirabilota	Methylomirabilia	Rokubacteriales	Rokubacteriales	0	0	0	0	0	0	0	0	0.00166037	0	0.000784709	0
1770	Bacteria	Actinobacteriota	Actinobacteria	Frankiales	Sporichthyaceae	0.00054484	0.000433507	0	0	0	0	0	0	0.000350414	0	0	0
1771	Bacteria	Bacteroidota	Bacteroidia	Sphingobacteriales	env.OPS_17	0	0	0	0	0.000175537	0	0.000440723	0	0	0	0	0
1772	Bacteria	Fibrobacterota	Fibrobacteria	Fibrobacterales	Fibrobacteraceae	0	0	0	0	0	0	0	0	0	0	0	0
1773	Bacteria	Proteobacteria	Alphaproteobacteria	Rhizobiales	Rhizobiales_Incertae_Sedis	0	0	0	0	0	0.00160863	0	0	0	0	0	0
1774	Bacteria	Proteobacteria	Gammaproteobacteria	Enterobacterales	Enterobacteriaceae	0	0	0	0	0	0	0	0	0.0004597	0	0	0
1775	Bacteria	Proteobacteria	Alphaproteobacteria	Rickettsiales	Mitochondria	0	0	0	0	0	0	0	0	0	0	0	0
1776	Bacteria	Bdellovibrionota	Bdellovibrionia	Bdellovibrionales	Bdellovibrionaceae	0	0	0	0.000249613	0	0	0	0	0	0	0	0
1777	Bacteria	Bdellovibrionota	Oligoflexia	Silvanigrellales	Silvanigrellaceae	0.00145383	0	0.000915108	0.00019969	0	0	0	0	0	0	0	0
1778	Bacteria	Verrucomicrobiota	Chlamydiae	Chlamydiales	Simkaniaceae	0	0	4.67724e-05	0	0	0	0	0	0	0	0	0
1779	Bacteria	Bdellovibrionota	Oligoflexia	0319-6G20	0319-6G20	0	0	8.41695e-05	0	0	0	0	0	0	0	0	0
1780	Bacteria	Bacteroidota	Bacteroidia	Sphingobacteriales	env.OPS_17	0	0.000366813	0	0.000898607	0	0	0.00104672	0	0	0	0	0
1781	Bacteria	Firmicutes	Symbiobacteriia	Symbiobacteriales	Symbiobacteraceae	0	0	0	0.00019969	0	0	0	0	0	0	0	0
1782	Bacteria	Spirochaetota	MVP-15	MVP-15	MVP-15	0	0	4.40789e-05	0	0	0	0	0	0	0	0	0
1783	Bacteria	Proteobacteria	Alphaproteobacteria	Rickettsiales	Rickettsiaceae	0	0	0	0	0	0	0	0	0	0	0	0.00112263
1784	Bacteria	Proteobacteria	Alphaproteobacteria	Rhodobacterales	Rhodobacteraceae	0	0	0.000140317	0	0	0	0	0	0.00117942	0	0.000670458	0
1785	Bacteria	Desulfobacterota	Desulfobulbia	Desulfobulbales	Desulfurivibrionaceae	0	0.00141032	0	0.000624033	0	0	0	0	0.00048895	0	0	0
1786	Bacteria	Bacteroidota	Bacteroidia	Chitinophagales	Chitinophagaceae	0	0	0	0.000299536	0	0	0	0	0.000459646	0	0.00131261	0
1787	Bacteria	Bacteroidota	Bacteroidia	Cytophagales	Microscillaceae	5.59167e-05	0	0	0	0	0	0	0	0	0	0	0
1788	Archaea	Crenarchaeota	Nitrososphaeria	Nitrososphaerales	Nitrososphaeraceae	0	0	0	0.000399381	0	0	0	0	0	0	0	0
1789	Bacteria	Proteobacteria	Alphaproteobacteria	Rickettsiales	Mitochondria	0	0	0.000299736	0	0	0	0	0	0	0	0	0
1790	Bacteria	Proteobacteria	Alphaproteobacteria	Rhizobiales	Beijerinckiaceae	0	0	0.000146999	0	0	0	0	0	0.000675603	0	0	0
1791	Bacteria	SAR324_clade(Marine_group_B)	SAR324_clade(Marine_group_B)	SAR324_clade(Marine_group_B)	SAR324_clade(Marine_group_B)	0	0	0	0	2.19421e-05	0	0	0	0.00039116	0	0	0
1792	Bacteria	Verrucomicrobiota	Lentisphaeria	Oligosphaerales	Lenti-02	0	0	0	0.00019969	0	0	0	0	0	0	0.000462385	0
1793	Bacteria	Patescibacteria	Parcubacteria	Candidatus_Nomurabacteria	Candidatus_Nomurabacteria	0	0	0	0	0	0	0	0	0	0	0	0
1794	Bacteria	Proteobacteria	Alphaproteobacteria	Rhizobiales	Rhizobiales_Incertae_Sedis	0	0	0.000158684	0	0	0	0	0	0	0	0	0
1795	Bacteria	Bacteroidota	Bacteroidia	Sphingobacteriales	env.OPS_17	0	0	0	0.00019969	0	0	0	0	0	0	0	0
1796	Bacteria	Verrucomicrobiota	Verrucomicrobiae	Pedosphaerales	Pedosphaeraceae	0	0	0	0	0	0	0	0	0.000192524	0	0	0
1797	Bacteria	Proteobacteria	Gammaproteobacteria	Burkholderiales	Comamonadaceae	0	0.00163399	0	0	0	0	0	0	0	0	0	0
1798	Bacteria	Deinococcota	Deinococci	Deinococcales	Deinococcaceae	0	0	5.34541e-05	0	0	0	0	0	0	0	0	0
1799	Bacteria	Dependentiae	Babeliae	Babeliales	Babeliales	0	0	0.000741748	0	0.000420715	0	0	0	0	0	0	0
1800	Bacteria	Planctomycetota	Planctomycetes	Gemmatales	Gemmataceae	0	0	0	0	0.000505669	0	0	0	0	0	0	0
1801	Bacteria	Marinimicrobia_(SAR406_clade)	Marinimicrobia_(SAR406_clade)	Marinimicrobia_(SAR406_clade)	Marinimicrobia_(SAR406_clade)	0	0	2.00453e-05	0	0	0	0	0	0	0	0.000972394	0.00133647
1802	Bacteria	Bdellovibrionota	Oligoflexia	0319-6G20	0319-6G20	7.16538e-05	0	0	0	0	0	0	0	0	0	0	0
1803	Bacteria	Planctomycetota	OM190	OM190	OM190	0	0	0	0	2.93015e-05	0	0	0	0	0	0	0
1804	Archaea	Nanoarchaeota	Nanoarchaeia	Woesearchaeales	Woesearchaeales	0	0	0	0.000224652	0	0	0	0	0	0	0	0
1805	Bacteria	Acidobacteriota	Blastocatellia	DS-100	DS-100	2.09688e-05	0	0	0	0	0	0.000661084	0	0	0	0	0
1806	Bacteria	Desulfobacterota	Desulfobulbia	Desulfobulbales	Desulfocapsaceae	0	6.79671e-05	0	0	0	0	0	0	0	0	0	0
1807	Bacteria	Proteobacteria	Gammaproteobacteria	Xanthomonadales	Xanthomonadaceae	0	0	0.00029176	0.000648994	0	0	0	0	0	0	0	0
1808	Bacteria	Gemmatimonadota	Gemmatimonadetes	Gemmatimonadales	Gemmatimonadaceae	0	0	0	0	0	0	0	0	8.15252e-05	0.000557958	0.000253678	0
1809	Bacteria	Planctomycetota	Planctomycetes	Pirellulales	Pirellulaceae	2.09688e-05	0	0	0	0	0	0	0	0	0	0.000346789	0.00351249
1810	Bacteria	Proteobacteria	Alphaproteobacteria	Rhodospirillales	uncultured	0	0	9.69735e-05	0	0	0	0	0	0	0	0	0
1811	Archaea	Nanoarchaeota	Nanoarchaeia	Woesearchaeales	Woesearchaeales	0	0.000458778	0	0	0	0	0	0	0	0	0	0
1812	Bacteria	Proteobacteria	Gammaproteobacteria	Burkholderiales	Comamonadaceae	0	0.00170068	0	0	0	0	0	0	0	0	0	0
1813	Bacteria	Verrucomicrobiota	Verrucomicrobiae	Opitutales	Opitutaceae	0	0	0	0	0	0	0.000716175	0	0	0	0	0
1814	Bacteria	Proteobacteria	Alphaproteobacteria	Rhizobiales	Rhizobiales_Incertae_Sedis	0	0	0	0	0	0	0	0	0.000268922	0	0.000756684	0.00585621
1815	Bacteria	Bacteroidota	Bacteroidia	Chitinophagales	Saprospiraceae	0	0	0	0	0	0	0	0	0.00028362	0	0	0
1816	Bacteria	Bdellovibrionota	Oligoflexia	Oligoflexales	Oligoflexales	0	0	1.33635e-05	0	0	0	0	0	0.000256222	0	0	0
1817	Bacteria	Firmicutes	Syntrophomonadia	Syntrophomonadales	Syntrophomonadaceae	0	0	0	0	0	0.000103783	0	0	0.000139758	0	0	0
1818	Bacteria	Proteobacteria	Gammaproteobacteria	Burkholderiales	Alcaligenaceae	0	0	0	0	8.79044e-05	0	0	0	0	0	0	0
1819	Bacteria	Patescibacteria	Microgenomatia	Candidatus_Amesbacteria	Candidatus_Amesbacteria	0	0	0	0	0	0	0	0	0	0	0	0
1820	Bacteria	Bacteroidota	Bacteroidia	Bacteroidales	Williamwhitmaniaceae	0	0	0	0.000124807	0	0	0	0	0	0	0	0
1821	Bacteria	Bacteroidota	Bacteroidia	Chitinophagales	37-13	0	0	3.34088e-05	0	0	0	0	0	0	0	0	0
1822	Bacteria	Proteobacteria	Gammaproteobacteria	Diplorickettsiales	Diplorickettsiaceae	0	0	0	0	0	0	0	0	0	0	0	0
1823	Bacteria	Dependentiae	Babeliae	Babeliales	Babeliales	0	0	4.67724e-05	0	0	0	0	0	0	0	0	0
1824	Bacteria	Proteobacteria	Alphaproteobacteria	uncultured	uncultured	0	0	0	0	9.72441e-05	0	0	0	0.000334116	0	0.000784709	0
1825	Bacteria	Bdellovibrionota	Oligoflexia	0319-6G20	0319-6G20	0	0	0	0.000174729	0	0	0	0	0.000886627	0	0	0
1826	Bacteria	Firmicutes	Clostridia	Lachnospirales	Lachnospiraceae	0	0	0	0	0	0	0	0	0.00018906	0	0.000254312	0
1827	Bacteria	Firmicutes	Clostridia	Ambiguous_taxa	Ambiguous_taxa	0.024155	0.0387782	0.000756231	0.000873646	0.000274276	0.00134918	0.00104672	0	0	0	0	0
1828	Bacteria	Sva0485	Sva0485	Sva0485	Sva0485	1.39792e-05	0	0	0	0	0	0	0	0.000489138	0	0	0
1829	Bacteria	Proteobacteria	Alphaproteobacteria	Paracaedibacterales	Paracaedibacteraceae	0	0	0	0.000174729	0	0	0	0	0.000317817	0	0	0
1830	Bacteria	Chloroflexi	Chloroflexia	Chloroflexales	Roseiflexaceae	0	0	0	0	0	0	0	0	0	0	0	0
1831	Bacteria	Chloroflexi	Anaerolineae	Anaerolineales	Anaerolineaceae	0	0	0	0	0	0	0	0	0.00295781	0	0.00109857	0
1832	Bacteria	Myxococcota	Polyangia	Nannocystales	Nannocystaceae	0	0	0	7.48839e-05	0	0	0	0	0.000336914	0	0	0
1833	Bacteria	Bacteroidota	Bacteroidia	Cytophagales	Flammeovirgaceae	0	0	0	0	0	0	0.000165271	0	0	0	0	0
1834	Bacteria	Bacteroidota	Bacteroidia	Flavobacteriales	Weeksellaceae	0	0.00410164	0	0	0	0	0	0	0	0	0	0
1835	Bacteria	Patescibacteria	Gracilibacteria	Absconditabacteriales_(SR1)	Absconditabacteriales_(SR1)	5.59167e-05	0	0	0	0	0	0	0	0	0	0	0
1836	Bacteria	Planctomycetota	Planctomycetes	Gemmatales	Gemmataceae	0	0	0	9.98452e-05	0	0	0	0	0	0	0	0
1837	Bacteria	Patescibacteria	Parcubacteria	Candidatus_Moranbacteria	Candidatus_Moranbacteria	0	0	0	0	0	0	0	0	0	0	0	0
1838	Bacteria	Proteobacteria	Gammaproteobacteria	Burkholderiales	Neisseriaceae	0	0	0	0	0.000131857	0	0	0	0	0	0	0
1839	Bacteria	Proteobacteria	Alphaproteobacteria	Rhizobiales	Rhizobiales_Incertae_Sedis	0	0	0	0	0	0	0	0	4.8895e-05	0.00147211	0	0
1840	Bacteria	Planctomycetota	Planctomycetes	Planctomycetales	Rubinisphaeraceae	9.08646e-05	0	0	0	0	0	0	0	0.000357544	0	0	0
1841	Bacteria	Bacteroidota	Bacteroidia	Chitinophagales	Chitinophagaceae	0	0	0.000326833	0	0	0.000830263	0	0	0	0	0.000158549	0
1842	Bacteria	MBNT15	MBNT15	MBNT15	MBNT15	0	0	0	0.00019969	0	0	0	0	0	0	0	0
1843	Archaea	Nanoarchaeota	Nanoarchaeia	Woesearchaeales	SCGC_AAA011-D5	0	0	2.00453e-05	0	0	0	0	0	0	0	0	0
1844	Bacteria	Bacteroidota	Bacteroidia	Chitinophagales	Saprospiraceae	3.49479e-05	0	0	0.000249613	0	0	0	0	0	0	0	0
1845	Bacteria	Bdellovibrionota	Oligoflexia	Oligoflexales	uncultured	0	0	0	0	0	0	0	0	0	0	0	0
1846	Bacteria	Cyanobacteria	Cyanobacteriia	Leptolyngbyales	Leptolyngbyaceae	0	0	0	0	0	0.00072648	0	0	0	0	0	0
1847	Bacteria	Bdellovibrionota	Bdellovibrionia	Bdellovibrionales	Bdellovibrionaceae	0	0	1.76316e-05	0	0	0	0	0	0	0	0	0
1848	Bacteria	Patescibacteria	Gracilibacteria	JGI_0000069-P22	JGI_0000069-P22	0	0	0	0	0	0	0	0	0.00117779	0	0	0
1849	Bacteria	Chloroflexi	Anaerolineae	SBR1031	A4b	0	0	2.64473e-05	0	0	0	0	0	0.000490152	0	0	0
1850	Bacteria	Bdellovibrionota	Oligoflexia	0319-6G20	0319-6G20	0	0	0	0	0	0	0	0	0.000325821	0	0.00042038	0
1851	Bacteria	Nitrospirota	Thermodesulfovibrionia	uncultured	uncultured	0	0	0	0	0	0	0	0	0	0	0.000416146	0
1852	Bacteria	Proteobacteria	Alphaproteobacteria	Micavibrionales	uncultured	0	0	0	0	0.00057698	0	0	0	0	0	0	0
1853	Bacteria	Firmicutes	Bacilli	Paenibacillales	Paenibacillaceae	0	0	5.34541e-05	0	0	0	0	0	0	0	0	0
1854	Bacteria	Verrucomicrobiota	Omnitrophia	Omnitrophales	Omnitrophaceae	0	0	3.63148e-05	0	0	0	0	0	0	0	0	0
1855	Bacteria	Proteobacteria	Alphaproteobacteria	Rickettsiales	Mitochondria	0.00016076	0	0.000193947	0	0	0	0	0	0	0	0	0
1856	Bacteria	Myxococcota	bacteriap25	bacteriap25	bacteriap25	0	0	0	0	0	0	0	0	0	0	0	0
1857	Bacteria	Proteobacteria	Alphaproteobacteria	Sphingomonadales	Sphingomonadaceae	5.59167e-05	0	0.000430863	0.000149768	0.000275222	0	0	0	0	0	0	0
1858	Bacteria	Proteobacteria	Gammaproteobacteria	Aeromonadales	Aeromonadaceae	0	0	0	0	2.93015e-05	0	0	0	0	0	0	0
1859	Bacteria	Proteobacteria	Gammaproteobacteria	Acidiferrobacterales	Acidiferrobacteraceae	6.98959e-05	0	0	0.000299536	0	0	0.000550903	0	0	0	0	0
1860	Bacteria	Proteobacteria	Alphaproteobacteria	Rickettsiales	Mitochondria	0	0	0.000735906	0	0	0	0	0	0	0	0	0
1861	Bacteria	Bacteroidota	Bacteroidia	Sphingobacteriales	Sphingobacteriaceae	0	0.000433507	0	0	0	0	0	0	0	0	0	0
1862	Bacteria	Actinobacteriota	Actinobacteria	Corynebacteriales	Corynebacteriaceae	0	0	7.34994e-05	0	0	0	0	0	0.00134283	0	0	0
1863	Bacteria	Myxococcota	Myxococcia	Myxococcales	Myxococcaceae	0	0	0	0.000299536	0	0	0	0	0.000619336	0	0	0
1864	Bacteria	Bacteroidota	Bacteroidia	Flavobacteriales	Flavobacteriaceae	0	0	5.44722e-05	0	0	0	0	0	0.000323492	0	0	0
1865	Bacteria	Patescibacteria	Parcubacteria	Parcubacteria	Parcubacteria	0	0	0	4.99226e-05	0	0	0	0	0	0	0	0
1866	Bacteria	Proteobacteria	Alphaproteobacteria	Rhodobacterales	Rhodobacteraceae	0	0	0	0	0	0.000674589	0	0	0	0	0	0
1867	Bacteria	Chloroflexi	Dehalococcoidia	MSBL5	MSBL5	0	8.49589e-05	0	0	0	0	0	0	0	0	0	0
1868	Archaea	Euryarchaeota	Methanobacteria	Methanobacteriales	Methanobacteriaceae	0	0	0	0	0	0	0	0	0.00132836	0.000836937	0.00135986	0
1869	Bacteria	Bacteroidota	Bacteroidia	Cytophagales	Flammeovirgaceae	0	0	0.0001675	0.000149768	0.000117206	0	0.000220361	0	0	0	0.000308279	0
1870	Bacteria	Proteobacteria	Alphaproteobacteria	Holosporales	Holosporaceae	0	0	0	0	0	0	0	0	0.000865517	0	0	0
1871	Archaea	Nanoarchaeota	Nanoarchaeia	Woesearchaeales	Woesearchaeales	0	0.000101951	0	0	0	0	0	0	0.000620921	0	0	0
1872	Bacteria	Bacteroidota	Bacteroidia	Cytophagales	Microscillaceae	0.000125813	0	0	0	0	0.000830263	0	0	0	0	0	0
1873	Bacteria	Proteobacteria	Alphaproteobacteria	Rhizobiales	Rhizobiaceae	0	0.000254877	0	0	0	0	0	0	0	0	0	0
1874	Bacteria	Firmicutes	Clostridia	Peptostreptococcales-Tissierellales	Peptostreptococcaceae	0	0	0.000126954	0	0	0	0	0	0	0	0	0
1875	Bacteria	Proteobacteria	Gammaproteobacteria	Xanthomonadales	Xanthomonadaceae	0	0	0	0.000549149	0	0	0	0	0	0	0	0
1876	Bacteria	Acidobacteriota	Thermoanaerobaculia	Thermoanaerobaculales	Thermoanaerobaculaceae	0	0	0	0	0	0	0	0	0	0	0	0
1877	Bacteria	Latescibacterota	Latescibacterota	Latescibacterota	Latescibacterota	0	0	0	7.48839e-05	0	0	0	0	0	0	0	0
1878	Bacteria	Planctomycetota	Planctomycetes	Pirellulales	Pirellulaceae	0	0	0	0	0	0	0	0	0	0	0	0
1879	Bacteria	Bdellovibrionota	Oligoflexia	0319-6G20	0319-6G20	0	0	6.01359e-05	0	0	0	0	0	0	0	0	0
1880	Bacteria	Proteobacteria	Alphaproteobacteria	Micavibrionales	uncultured	0	0	0	0	0	0	0	0	0	0	0	0
1881	Bacteria	Firmicutes	Negativicutes	Veillonellales-Selenomonadales	Sporomusaceae	0	0	2.67271e-05	0	0	0	0	0	0.000369957	0	0.00159598	0
1882	Bacteria	Bacteroidota	Bacteroidia	Cytophagales	Microscillaceae	0	0	0.000217805	0	0	0	0	0	0	0	0.000761668	0
1883	Bacteria	Actinobacteriota	Thermoleophilia	Solirubrobacterales	Solirubrobacteraceae	0	0	0	0.000673955	0	0	0	0	0	0	0	0
1884	Bacteria	Bacteroidota	Bacteroidia	Cytophagales	Cyclobacteriaceae	0	0	0.000289909	0	0	0	0.000440723	0	0	0	0	0
1885	Bacteria	Proteobacteria	Alphaproteobacteria	Caulobacterales	Caulobacteraceae	6.98959e-05	0.000271868	0	0	0	0	0	0	0	0	0	0
1886	Bacteria	Proteobacteria	Gammaproteobacteria	Salinisphaerales	Solimonadaceae	0	0	0	0	0	0	0	0	0	0	0	0
1887	Bacteria	Bacteroidota	Bacteroidia	Sphingobacteriales	Lentimicrobiaceae	0	0	0	0.000124807	0	0	0	0	0	0	0	0
1888	Bacteria	Proteobacteria	Alphaproteobacteria	Sphingomonadales	Sphingomonadaceae	0.00057323	0	0	0	0.000527426	0	0	0	0	0	0	0
1889	Bacteria	Firmicutes	Bacilli	Mycoplasmatales	Mycoplasmataceae	0	0	0	0	9.87394e-05	0	0	0	0	0	0	0
1890	Bacteria	Proteobacteria	Alphaproteobacteria	Micavibrionales	Micavibrionaceae	0	0	7.34994e-05	0.000524188	0	0	0	0	0	0	0	0
1891	Bacteria	Bacteroidota	Bacteroidia	Flavobacteriales	Flavobacteriaceae	0.000132802	0	6.17104e-05	0	0	0	0	0	0	0	0	0
1892	Bacteria	Deinococcota	Deinococci	Deinococcales	Deinococcaceae	0	0	0	0	7.32536e-05	0	0	0	0.000230359	0	0	0
1893	Bacteria	Patescibacteria	Parcubacteria	Parcubacteria	Parcubacteria	0	0	0	0	0	0.000674589	0.000220361	0	0.000331787	0	0	0
1894	Bacteria	Bacteroidota	Bacteroidia	Chitinophagales	uncultured	0	0	9.69735e-05	0	4.39522e-05	0	0	0	0	0	0	0
1895	Bacteria	Patescibacteria	Gracilibacteria	Gracilibacteria	Gracilibacteria	0	0	0	0	0.000175552	0	0	0	0	0	0	0
1896	Bacteria	Proteobacteria	Alphaproteobacteria	Rhodospirillales	uncultured	0	0	0	0	5.48552e-05	0	0	0	0	0	0	0
1897	Bacteria	Proteobacteria	Alphaproteobacteria	Kiloniellales	Kiloniellaceae	0	0.000220893	0	0	0	0	0	0	0.000218427	0	0	0
1898	Bacteria	PAUC34f	PAUC34f	PAUC34f	PAUC34f	0	0.000101951	0	0	0	0	0	0	0	0.000557958	0	0
1899	Bacteria	Elusimicrobiota	Elusimicrobia	Lineage_IV	Lineage_IV	0	0	3.34088e-05	0	0	0	0	0	0	0.000348724	0.000231192	0
1900	Bacteria	Bacteroidota	Bacteroidia	Bacteroidales	Marinilabiliaceae	0	0.000135934	0	0.000698917	0	0	0	0	0.00261237	0	0.0017494	0
1901	Bacteria	Patescibacteria	Gracilibacteria	Absconditabacteriales_(SR1)	Absconditabacteriales_(SR1)	0	0	8.01812e-05	0	0	0	0	0	0.00225708	0	0	0
1902	Bacteria	Bdellovibrionota	Oligoflexia	Oligoflexales	uncultured	0	0	0	0	0	0	0.000165271	0	0.00131446	0	0	0
1903	Bacteria	Proteobacteria	Alphaproteobacteria	Rhodobacterales	Rhodobacteraceae	0.00156104	0	0	0	0	0	0	0	0.000409902	0	0.000761035	0
1904	Archaea	Nanoarchaeota	Nanoarchaeia	Woesearchaeales	GW2011	7.68854e-05	0	2.00453e-05	0.000124807	0	0	0	0	0	0	0	0
1905	Bacteria	Proteobacteria	Gammaproteobacteria	Steroidobacterales	Steroidobacteraceae	0	0	0	0	0	0	0	0	0	0	0	0
1906	Bacteria	Proteobacteria	Alphaproteobacteria	Micavibrionales	uncultured	0	0	0	0	0	0	0	0	0	0	0	0
1907	Bacteria	Planctomycetota	BD7-11	BD7-11	BD7-11	0	0	0	0	0	0	0	0	0	0	0	0
1908	Bacteria	Firmicutes	Clostridia	Clostridia	Hungateiclostridiaceae	0	0	0.000133635	0	0	0	0	0	0	0	0	0
1909	Bacteria	SAR324_clade(Marine_group_B)	SAR324_clade(Marine_group_B)	SAR324_clade(Marine_group_B)	SAR324_clade(Marine_group_B)	0	0	0	0	0	0	0	0	0	0	0	0
1910	Bacteria	Proteobacteria	Gammaproteobacteria	Burkholderiales	Chromobacteriaceae	0	0	8.01812e-05	0	0	0	0	0	0	0	0	0
1911	Bacteria	Bacteroidota	Bacteroidia	SM1A07	SM1A07	0	0	0.000560507	0.00019969	0	0	0	0	0	0	0	0
1912	Bacteria	Verrucomicrobiota	Omnitrophia	Omnitrophales	Omnitrophaceae	0	0	0	0	0	0	0	0	0.000146685	0	0.000462385	0
1913	Bacteria	Proteobacteria	Alphaproteobacteria	Rhodospirillales	uncultured	0	0	2.67271e-05	0.000174729	0	0	0	0	8.14916e-05	0	0	0
1914	Bacteria	Proteobacteria	Gammaproteobacteria	Diplorickettsiales	Diplorickettsiaceae	0	0	6.17104e-05	0	0	0	0	0	0	0	0.000560507	0
1915	Bacteria	Proteobacteria	Alphaproteobacteria	Rickettsiales	Mitochondria	0	0	0	0	0	0	0.000165271	0	0	0	0	0
1916	Bacteria	Proteobacteria	Gammaproteobacteria	Burkholderiales	Neisseriaceae	0	0	0	0	0.000160577	0.000518914	0	0	0	0	0	0
1917	Bacteria	Acidobacteriota	Thermoanaerobaculia	Thermoanaerobaculales	Thermoanaerobaculaceae	0	0	0	0.00019969	0	0	0	0	0	0	0	0
1918	Bacteria	Nitrospirota	4-29-1	4-29-1	4-29-1	0	0	0	0.000324497	0	0	0	0	0.000325093	0	0.000605334	0.000855341
1919	Bacteria	Firmicutes	Clostridia	Peptostreptococcales-Tissierellales	Peptostreptococcaceae	0	0.000543737	0	0	0	0	0	0	0	0	0	0
1920	Bacteria	Spirochaetota	Spirochaetia	Spirochaetales	Spirochaetaceae	0	0	0	0	0	0	0	0	0	0	0	0
1921	Bacteria	Proteobacteria	Alphaproteobacteria	Caulobacterales	Hyphomonadaceae	0	0	0	0	0	0	0.000440723	0	0	0	0	0
1922	Bacteria	Proteobacteria	Gammaproteobacteria	Oceanospirillales	Halomonadaceae	0	0	4.00906e-05	0	0	0	0	0	0	0	0	0
1923	Bacteria	Verrucomicrobiota	Omnitrophia	Omnitrophales	Omnitrophales	0	0	0	0.000599071	0	0	0	0	0	0	0	0
1924	Archaea	Nanoarchaeota	Nanoarchaeia	Woesearchaeales	Woesearchaeales	0	0	0	0	0	0	0	0	0	0	0	0
1925	Bacteria	Bacteroidota	Bacteroidia	Chitinophagales	Saprospiraceae	5.59167e-05	0	0.000217889	0.000324497	0	0	0	0	0.00067312	0	0	0
1926	Bacteria	Bdellovibrionota	Oligoflexia	0319-6G20	0319-6G20	0	0	0	0.000174729	0	0	0	0	0	0	0	0
1927	Bacteria	Bacteroidota	Bacteroidia	Bacteroidetes_VC2.1_Bac22	Bacteroidetes_VC2.1_Bac22	0	0	0	0.000149768	0	0	0	0	0	0	0	0
1928	Bacteria	Spirochaetota	Leptospirae	Leptospirales	Leptospiraceae	0	0	0	0.000524188	0	0	0	0	0.000419293	0	0	0
1929	Bacteria	Cyanobacteria	Cyanobacteriia	Chloroplast	Chloroplast	0	0	0	0	0	0	0	0	0.000195327	0	0	0
1930	Bacteria	Bdellovibrionota	Oligoflexia	0319-6G20	0319-6G20	0	0	0	0.000174729	0	0	0	0	0	0	0.000208073	0
1931	Bacteria	Bacteroidota	Bacteroidia	Cytophagales	Hymenobacteraceae	0	0	8.6863e-05	0	0	0	0	0	0.00048895	0	0	0
1932	Bacteria	Acidobacteriota	Vicinamibacteria	Vicinamibacterales	Vicinamibacteraceae	0	0	0	0	0	0.00114161	0	0	0.000334116	0	0	0
1933	Bacteria	Cyanobacteria	Cyanobacteriia	Leptolyngbyales	Leptolyngbyaceae	0.000139792	0	0.000653666	0	0	0	0	0	0	0	0	0
1934	Bacteria	Acidobacteriota	AT-s3-28	AT-s3-28	AT-s3-28	0	0	0	0	0	0	0	0	0	0	0	0
1935	Bacteria	Bdellovibrionota	Oligoflexia	Oligoflexales	uncultured	0	0	0	0	0	0	0	0	0	0	0	0
1936	Bacteria	Acidobacteriota	Vicinamibacteria	Vicinamibacterales	uncultured	0	0	0	0.000149768	0	0	0	0	0	0	0	0
1937	Bacteria	Bdellovibrionota	Oligoflexia	0319-6G20	0319-6G20	0	0	0	0	0	0	0	0	0	0	0	0
1938	Bacteria	Bacteroidota	Bacteroidia	Sphingobacteriales	env.OPS_17	0	0	0.00022921	0.000274574	0	0	0	0	0	0	0	0
1939	Bacteria	Bacteroidota	Bacteroidia	Cytophagales	Spirosomaceae	0	0	0	0	0	0	0	0	0	0	0	0
1940	Bacteria	Bacteroidota	Bacteroidia	Chitinophagales	Chitinophagaceae	0	0	0	0.000274574	0	0	0	0	0	0	0	0
1941	Bacteria	Bacteroidota	Rhodothermia	Rhodothermales	Rhodothermaceae	0	0	5.28947e-05	0	5.83465e-05	0	0	0	0	0	0	0
1942	Bacteria	Proteobacteria	Gammaproteobacteria	Burkholderiales	T34	0	0	0	0.000798762	0	0	0	0	7.33425e-05	0	0.000707623	0
1943	Bacteria	Aquificota	Aquificae	Hydrogenothermales	Hydrogenothermaceae	0	0	0	0	8.77684e-05	0	0	0	0	0	0	0
1944	Bacteria	Verrucomicrobiota	Verrucomicrobiae	Pedosphaerales	Pedosphaeraceae	0	0	0	0.000149768	0	0	0	0	0.00275094	0	0.00120576	0
1945	Bacteria	Proteobacteria	Gammaproteobacteria	Burkholderiales	Burkholderiaceae	0	0.0010004	0	0	0	0	0	0	0	0	0	0
1946	Bacteria	Proteobacteria	Gammaproteobacteria	Burkholderiales	Comamonadaceae	0.0017672	0.0146725	0.000652367	0	0.00528737	0	0.00104672	0	0	0	0	0
1947	Bacteria	Desulfobacterota	Thermodesulfobacteria	Thermodesulfobacteriales	Thermodesulfobacteriaceae	0	0	0	0.000124807	0.000233642	0	0	0	0	0	0	0
1948	Bacteria	Deinococcota	Deinococci	Deinococcales	Deinococcaceae	0	0	0	0	0	0.00160863	0	0	0	0	0	0
1949	Bacteria	Acidobacteriota	Thermoanaerobaculia	Thermoanaerobaculales	Thermoanaerobaculaceae	0	0	0	0.000349458	0	0	0	0	0	0	0	0
1950	Bacteria	Firmicutes	Bacilli	Mycoplasmatales	Mycoplasmataceae	0	0	0	0.000399381	0	0	0	0	0	0	0	0
1951	Bacteria	Planctomycetota	Planctomycetes	Gemmatales	Gemmataceae	0	0	0	0	8.79044e-05	0	0	0	0	0	0	0
1952	Bacteria	Actinobacteriota	Actinobacteria	Propionibacteriales	Propionibacteriaceae	0	0	0	0	0.000175039	0	0	0	0	0	0	0
1953	Bacteria	Patescibacteria	Parcubacteria	Parcubacteria	Parcubacteria	0	0	0	0	0	0	0	0	6.51933e-05	0.000697447	0.000115596	0
1954	Bacteria	Chloroflexi	KD4-96	KD4-96	KD4-96	0	0	6.17104e-05	0	0	0	0	0	0.000720473	0	0.000560507	0
1955	Bacteria	Cyanobacteria	Sericytochromatia	Sericytochromatia	Sericytochromatia	0	0	0	0	0	0	0	0	0.000527803	0	0	0
1956	Bacteria	Proteobacteria	Alphaproteobacteria	Rickettsiales	SM2D12	0	0	0	0	0	0	0	0	0	0	0	0
1957	Bacteria	Firmicutes	Clostridia	Clostridiales	Clostridiaceae	7.68854e-05	0.000466853	0	0	0	0	0	0	0	0	0	0
1958	Bacteria	Bdellovibrionota	Oligoflexia	0319-6G20	0319-6G20	0	0	0	0	0.000405929	0	0	0	0	0	0	0
1959	Bacteria	Proteobacteria	Alphaproteobacteria	Rickettsiales	Mitochondria	0	0	8.01812e-05	0	0	0	0	0	0	0	0	0
1960	Bacteria	Myxococcota	Polyangia	Nannocystales	Nannocystaceae	0	0	3.52631e-05	0	0	0	0	0	0	0	0	0
1961	Bacteria	Cyanobacteria	Cyanobacteriia	Chloroplast	Chloroplast	0	0	0.000246842	0	0	0	0	0	0	0	0	0
1962	Bacteria	Verrucomicrobiota	Chlamydiae	Chlamydiales	Parachlamydiaceae	0	0	0	0	0	0	0	0	0	0	0	0
1963	Bacteria	NB1-j	NB1-j	NB1-j	NB1-j	2.09688e-05	0	3.52631e-05	0	0	0	0	0	0	0	0	0
1964	Bacteria	Proteobacteria	Gammaproteobacteria	Burkholderiales	Comamonadaceae	0	0	0	0	0.00206542	0	0	0	0	0	0	0
1965	Bacteria	Firmicutes	Bacilli	Erysipelotrichales	Erysipelotrichaceae	0	0	0	9.98452e-05	0	0	0	0	0	0	0	0
1966	Bacteria	Spirochaetota	Spirochaetia	Spirochaetales	Spirochaetaceae	0	0	0	0.000349458	0	0	0	0	0	0	0	0
1967	Bacteria	Firmicutes	Clostridia	Lachnospirales	Lachnospiraceae	0	0	0.000240544	0	0	0	0	0	0	0	0	0
1968	Bacteria	Planctomycetota	Planctomycetes	Pirellulales	Pirellulaceae	0	0	0	0	0	0.000207566	0	0	0.000543713	0	0	0
1969	Bacteria	Patescibacteria	Gracilibacteria	Absconditabacteriales_(SR1)	Absconditabacteriales_(SR1)	0	0	0	0	0	0	0	0	8.51296e-05	0	0	0
1970	Bacteria	Bacteroidota	Bacteroidia	Cytophagales	Cytophagaceae	0	0	0.00022921	0	0	0	0	0	0.000174697	0.000557958	0	0
1971	Bacteria	Bacteroidota	Bacteroidia	Chitinophagales	Saprospiraceae	0	0	0	0	0	0	0	0	0.000285288	0	0	0
1972	Bacteria	Firmicutes	Bacilli	Lactobacillales	Lactobacillaceae	0	0	8.01812e-05	0	0	0	0	0	0	0	0.00114155	0
1973	Bacteria	Verrucomicrobiota	Verrucomicrobiae	Opitutales	Opitutaceae	0	0	0	0.000174729	0	0	0	0	0	0	0	0
1974	Bacteria	Cyanobacteria	Cyanobacteriia	Cyanobacteriales	Nostocaceae	0.000244635	0	0	0	0	0	0	0	0	0	0	0
1975	Bacteria	Proteobacteria	Alphaproteobacteria	Rickettsiales	AB1	0	0	0.000146719	0	0	0	0	0	0	0	0	0
1976	Bacteria	Cyanobacteria	Cyanobacteriia	Chloroplast	Chloroplast	0	0	0	0.000224652	0	0	0	0	0	0	0	0
1977	Bacteria	Proteobacteria	Gammaproteobacteria	Burkholderiales	Rhodocyclaceae	0.000526737	0.00101994	0	0	0	0	0	0	0	0	0	0
1978	Bacteria	Verrucomicrobiota	Omnitrophia	Omnitrophales	Omnitrophales	0	0	0	0	0	0	0	0	0	0	0	0
1979	Bacteria	Bacteroidota	Bacteroidia	Bacteroidales	Marinilabiliaceae	2.79583e-05	0	0	0	0	0	0	0	0	0	0	0
1980	Bacteria	Gemmatimonadota	BD2-11_terrestrial_group	BD2-11_terrestrial_group	BD2-11_terrestrial_group	0	0.000101951	0	0	0	0	0	0	0	0	0	0
1981	Bacteria	Bacteroidota	Bacteroidia	Flavobacteriales	Flavobacteriaceae	0.00133501	0	0.000421127	0	0	0	0	0	0	0	0	0
1982	Bacteria	Verrucomicrobiota	Verrucomicrobiae	Verrucomicrobiales	Rubritaleaceae	0	0	0	0	0	0.000934046	0	0	0	0	0	0
1983	Bacteria	Bacteroidota	Bacteroidia	Chitinophagales	Chitinophagaceae	0	0	0	0.00019969	0	0	0	0	0	0	0	0
1984	Bacteria	Proteobacteria	Alphaproteobacteria	Paracaedibacterales	Paracaedibacteraceae	0	0	5.28947e-05	0	0	0	0	0	0.000285221	0.00306877	0.00358724	0.0013703
1985	Bacteria	Bdellovibrionota	Bdellovibrionia	Bdellovibrionales	Bdellovibrionaceae	0	0	0	0	0	0	0	0	0	0	0.00109299	0.00645926
1986	Bacteria	Bacteroidota	Bacteroidia	Sphingobacteriales	Lentimicrobiaceae	0	0	0	0	0	0	0	0	0.00080225	0	0.00226823	0
1987	Bacteria	Desulfobacterota	Desulfovibrionia	Desulfovibrionales	Desulfovibrionaceae	0	0	0.000145259	0	0	0	0	0	0.000468629	0	0	0
1988	Archaea	Nanoarchaeota	Nanoarchaeia	Woesearchaeales	Woesearchaeales	1.39792e-05	0	0	0	0	0	0	0	0.000309668	0	0	0
1989	Bacteria	Acidobacteriota	Subgroup_22	Subgroup_22	Subgroup_22	0	0	0	0	0	0	0	0	0.000285221	0	0.000783926	0
1990	Bacteria	Bacteroidota	Bacteroidia	Sphingobacteriales	NS11-12_marine_group	0	0	0	0	0	0	0.000440723	0	0.000277072	0	0	0
1991	Bacteria	Planctomycetota	Pla3_lineage	Pla3_lineage	Pla3_lineage	0	0	0	0	0	0	0	0	0.000220027	0	0.000336304	0
1992	Bacteria	Proteobacteria	Alphaproteobacteria	Rhodospirillales	uncultured	0	0	9.51193e-05	0	0	0	0	0	0	0	0	0
1993	Bacteria	Proteobacteria	Alphaproteobacteria	Micavibrionales	Micavibrionaceae	0	0	0	0	7.77953e-05	0	0	0	0	0	0	0
1994	Bacteria	Bdellovibrionota	Oligoflexia	Oligoflexales	uncultured	0	0	4.67724e-05	0	0	0	0	0	0	0	0	0
1995	Bacteria	Planctomycetota	Planctomycetes	Planctomycetales	uncultured	0	0	0	0	0	0	0	0	0	0	0	0
1996	Bacteria	Actinobacteriota	Actinobacteria	Frankiales	Sporichthyaceae	0.000364601	0.000333467	0	0	0	0	0	0	0	0	0	0
1997	Bacteria	Firmicutes	Clostridia	Clostridiales	Caloramatoraceae	0	0.000390811	0	0	0	0	0	0	0	0	0	0
1998	Bacteria	Caldatribacteriota	JS1	JS1	JS1	0	0.00276202	0	0.00279567	0	0	0	0	0	0	0	0
1999	Bacteria	Proteobacteria	Alphaproteobacteria	Reyranellales	Reyranellaceae	5.59167e-05	0	0	0	0	0	0	0	0	0	0	0
[truncated: 11,006 more rows]
